# Supplementary material for: Multi-structural variational kinetics study on hydrogen abstraction reactions of cyclopentanol and cyclopentane by hydroperoxyl radical with anharmonicity, recrossing and tunneling effects
Source: Royal Society of Chemistry journal article supplement (doi:10.1039/d3cp00251a), 2023-01-01
Supplement: d3cp00251a1.zip [file d3cp00251a1.zip]

Supplementary Material for

**Multi-structural variational kinetics study on hydrogen abstraction reactions of cyclopentanol and cyclopentane by hydroperoxyl radical with anharmonicity, recrossing and tunneling effects**

Mo Yang, Juan Wang\*

*National Key Laboratory of Science and Technology on Aero-Engine Aero-Thermodynamics,  
School of Energy and Power Engineering, Beihang University, Beijing 100191, PR China.*

\*Corresponding author: [juanwang@buaa.edu.cn](mailto:juanwang@buaa.edu.cn) (J. Wang)

**CONTENTS**

|                                                                                             |        |
|---------------------------------------------------------------------------------------------|--------|
| 1. T1 diagnostic values for reaction species and saddle points.....                         | - 2 -  |
| 2. Electronic structure benchmark calculations by different model chemistries .....         | - 3 -  |
| 3. Conformational-rotational-vibrational partition functions .....                          | - 11 - |
| 4. Multistructural torsional anharmonicity factors.....                                     | - 19 - |
| 5. Thermodynamic properties for reactant and each transition state using three models ..... | - 24 - |
| 6. Location of generalized transition state at different temperatures.....                  | - 29 - |
| 7. Transmission coefficients.....                                                           | - 31 - |
| 8. Changes of vibrational frequencies along the reaction coordinate .....                   | - 36 - |
| 9. Vibrationally adiabatic ground energy along MEPs .....                                   | - 37 - |
| 10. Tabulated rate constants using different methods .....                                  | - 38 - |
| 11. Fitting parameters of modified Arrhenius equations.....                                 | - 48 - |
| 12. Temperature-dependent activation energies.....                                          | - 49 - |
| 13. Optimized geometries and calculated non-scaled frequencies .....                        | - 52 - |

## 1. T1 diagnostic values for reaction species and saddle points

Table S1 T1 diagnostic values for reaction species and saddle points calculated at the level of CCSD(T)-F12/jun-cc-pVTZ.

|                      | R1    | R2a   | R2b   | R3a   | R3b   | R4    | $R_{cpt}$ |
|----------------------|-------|-------|-------|-------|-------|-------|-----------|
| saddle points        | 0.019 | 0.018 | 0.017 | 0.018 | 0.016 | 0.033 | 0.016     |
| products             | 0.013 | 0.012 | 0.012 | 0.011 | 0.011 | 0.017 | 0.011     |
| cyclopentanol        | 0.010 |       |       |       |       |       | -         |
| cyclopentane         | -     | -     | -     | -     | -     | -     | 0.009     |
| hydroperoxyl radical | 0.029 |       |       |       |       |       |           |
| hydroperoxide        | 0.011 |       |       |       |       |       |           |

## 2. Electronic structure benchmark calculations by different model chemistries

Table S2 Forward ( $V_f^\ddagger$ ) and reverse ( $V_r^\ddagger$ ) barrier heights, reaction energies ( $\Delta V$ ) and minimum mean unsigned deviations (MUDs) from the coupled cluster benchmark for cyclopentanol + HO<sub>2</sub> and cyclopentane +HO<sub>2</sub> (units: kcal/mol).

| Reaction  | Method      | Basis Set    | $V_f^\ddagger$ | $V_r^\ddagger$ | $\Delta V$ | MUDs |
|-----------|-------------|--------------|----------------|----------------|------------|------|
| <b>R1</b> | CCSD(T)-F12 | jun-cc-pVTZ  | 12.22          | 5.83           | 6.39       | 0.00 |
|           |             | MG3S         | 11.42          | 5.24           | 6.18       | 0.53 |
|           |             | ma-TZVP      | 12.78          | 5.81           | 6.96       | 0.38 |
|           |             | maug-cc-pVTZ | 12.03          | 6.01           | 6.01       | 0.25 |
|           |             | jun-cc-pVTZ  | 11.96          | 5.94           | 6.02       | 0.25 |
|           |             | jul-cc-pVTZ  | 11.89          | 5.90           | 5.98       | 0.27 |
|           |             | aug-cc-pVTZ  | 11.81          | 5.84           | 5.97       | 0.28 |
|           | M08-HX      | MG3S         | 11.64          | 5.88           | 5.76       | 0.42 |
|           |             | ma-TZVP      | 12.99          | 6.03           | 6.96       | 0.52 |
|           |             | maug-cc-pVTZ | 12.64          | 6.50           | 6.14       | 0.45 |
|           |             | jun-cc-pVTZ  | 12.61          | 6.46           | 6.16       | 0.42 |
|           |             | jul-cc-pVTZ  | 12.46          | 6.35           | 6.11       | 0.35 |
|           |             | aug-cc-pVTZ  | 12.41          | 6.30           | 6.12       | 0.31 |
|           | M08-SO      | MG3S         | 10.17          | 3.88           | 6.29       | 1.37 |
|           |             | ma-TZVP      | 10.87          | 4.08           | 6.79       | 1.16 |
|           |             | maug-cc-pVTZ | 10.35          | 4.47           | 5.89       | 1.24 |
|           |             | jun-cc-pVTZ  | 10.34          | 4.43           | 5.91       | 1.25 |
|           |             | jul-cc-pVTZ  | 10.28          | 4.42           | 5.86       | 1.29 |
|           |             | aug-cc-pVTZ  | 10.22          | 4.40           | 5.82       | 1.33 |
|           | M06-2X      | MG3S         | 10.79          | 3.56           | 7.23       | 1.51 |
|           |             | ma-TZVP      | 11.42          | 3.50           | 7.92       | 1.55 |

|            |             |              |       |      |       |      |
|------------|-------------|--------------|-------|------|-------|------|
| <b>R2a</b> |             | maug-cc-pVTZ | 10.90 | 4.08 | 6.81  | 1.16 |
|            |             | jul-cc-pVTZ  | 10.86 | 4.03 | 6.82  | 1.20 |
|            |             | aug-cc-pVTZ  | 10.79 | 4.04 | 6.75  | 1.19 |
|            |             | MG3S         | 10.66 | 6.05 | 4.60  | 1.19 |
|            |             | ma-TZVP      | 11.37 | 5.98 | 5.39  | 0.66 |
|            | MN15        | maug-cc-pVTZ | 11.34 | 6.72 | 4.62  | 1.18 |
|            |             | jul-cc-pVTZ  | 11.30 | 6.68 | 4.62  | 1.18 |
|            |             | jul-cc-pVTZ  | 11.10 | 6.50 | 4.60  | 1.19 |
|            |             | aug-cc-pVTZ  | 11.03 | 6.41 | 4.63  | 1.17 |
|            | CCSD(T)-F12 | jul-cc-pVTZ  | 16.35 | 6.19 | 10.16 | 0.00 |
|            | M08-HX      | MG3S         | 15.22 | 4.50 | 10.72 | 1.13 |
|            |             | ma-TZVP      | 17.07 | 5.29 | 11.77 | 1.08 |
|            |             | maug-cc-pVTZ | 16.04 | 5.59 | 10.44 | 0.39 |
|            |             | jul-cc-pVTZ  | 15.84 | 5.34 | 10.50 | 0.56 |
|            |             | jul-cc-pVTZ  | 15.84 | 5.35 | 10.49 | 0.56 |
|            |             | aug-cc-pVTZ  | 15.77 | 5.30 | 10.47 | 0.59 |
|            | M08-SO      | MG3S         | 15.26 | 6.07 | 9.19  | 0.73 |
|            |             | ma-TZVP      | 17.31 | 6.57 | 10.73 | 0.64 |
|            |             | maug-cc-pVTZ | 16.77 | 7.15 | 9.63  | 0.64 |
|            |             | jul-cc-pVTZ  | 16.62 | 6.90 | 9.73  | 0.47 |
|            |             | jul-cc-pVTZ  | 16.51 | 6.82 | 9.70  | 0.42 |
|            |             | aug-cc-pVTZ  | 16.44 | 6.77 | 9.67  | 0.39 |
|            | M06-2X      | MG3S         | 13.86 | 3.49 | 10.38 | 1.80 |
|            |             | ma-TZVP      | 14.85 | 3.88 | 10.98 | 1.54 |
|            |             | maug-cc-pVTZ | 14.20 | 4.35 | 9.85  | 1.43 |
|            |             | jul-cc-pVTZ  | 14.09 | 4.16 | 9.93  | 1.50 |
|            |             | jul-cc-pVTZ  | 14.07 | 4.19 | 9.88  | 1.52 |
|            |             | aug-cc-pVTZ  | 14.01 | 4.18 | 9.83  | 1.55 |

|            |             |              |       |      |       |      |
|------------|-------------|--------------|-------|------|-------|------|
| <b>R2b</b> | M05-2X      | MG3S         | 14.64 | 3.59 | 11.05 | 1.73 |
|            |             | ma-TZVP      | 15.58 | 3.66 | 11.92 | 1.68 |
|            |             | maug-cc-pVTZ | 14.85 | 4.33 | 10.52 | 1.24 |
|            |             | jun-cc-pVTZ  | 14.72 | 4.15 | 10.58 | 1.36 |
|            |             | jul-cc-pVTZ  | 14.70 | 4.20 | 10.51 | 1.32 |
|            |             | aug-cc-pVTZ  | 14.63 | 4.18 | 10.44 | 1.33 |
|            | MN15        | MG3S         | 13.95 | 4.98 | 8.98  | 1.59 |
|            |             | ma-TZVP      | 15.18 | 5.22 | 9.96  | 0.78 |
|            |             | maug-cc-pVTZ | 14.87 | 5.89 | 8.98  | 0.99 |
|            |             | jun-cc-pVTZ  | 14.75 | 5.71 | 9.04  | 1.06 |
|            |             | jul-cc-pVTZ  | 14.59 | 5.53 | 9.06  | 1.17 |
|            |             | aug-cc-pVTZ  | 14.48 | 5.49 | 8.99  | 1.25 |
|            | CCSD(T)-F12 | jun-cc-pVTZ  | 18.73 | 7.46 | 11.27 | 0.00 |
|            | M08-HX      | MG3S         | 18.65 | 6.86 | 11.78 | 0.40 |
|            |             | ma-TZVP      | 20.07 | 7.27 | 12.80 | 1.02 |
|            |             | maug-cc-pVTZ | 19.14 | 7.64 | 11.50 | 0.27 |
|            |             | jun-cc-pVTZ  | 19.10 | 7.56 | 11.54 | 0.25 |
|            |             | jul-cc-pVTZ  | 19.06 | 7.54 | 11.52 | 0.22 |
|            |             | aug-cc-pVTZ  | 18.95 | 7.43 | 11.51 | 0.16 |
|            | M08-SO      | MG3S         | 18.98 | 8.29 | 10.69 | 0.56 |
|            |             | ma-TZVP      | 20.41 | 8.28 | 12.12 | 1.12 |
|            |             | maug-cc-pVTZ | 19.99 | 8.88 | 11.11 | 0.95 |
|            |             | jun-cc-pVTZ  | 20.00 | 8.82 | 11.18 | 0.91 |
|            |             | jul-cc-pVTZ  | 19.88 | 8.75 | 11.13 | 0.86 |
|            |             | aug-cc-pVTZ  | 19.80 | 8.67 | 11.13 | 0.81 |
|            | M06-2X      | MG3S         | 17.18 | 5.63 | 11.55 | 1.22 |
|            |             | ma-TZVP      | 17.96 | 5.78 | 12.18 | 1.12 |
|            |             | maug-cc-pVTZ | 17.27 | 6.23 | 11.04 | 0.97 |
|            |             | jun-cc-pVTZ  | 17.29 | 6.18 | 11.11 | 0.96 |

|     |             |              |       |      |       |      |
|-----|-------------|--------------|-------|------|-------|------|
|     |             | jul-cc-pVTZ  | 17.24 | 6.19 | 11.04 | 1.00 |
|     |             | aug-cc-pVTZ  | 17.16 | 6.16 | 11.01 | 1.04 |
|     |             | MG3S         | 17.54 | 5.22 | 12.32 | 1.49 |
|     |             | ma-TZVP      | 18.17 | 4.99 | 13.19 | 1.65 |
|     | M05-2X      | maug-cc-pVTZ | 17.44 | 5.66 | 11.78 | 1.20 |
|     |             | jul-cc-pVTZ  | 17.45 | 5.63 | 11.83 | 1.22 |
|     |             | jul-cc-pVTZ  | 17.39 | 5.65 | 11.74 | 1.20 |
|     |             | aug-cc-pVTZ  | 17.29 | 5.60 | 11.69 | 1.24 |
|     |             | MG3S         | 17.70 | 7.42 | 10.29 | 0.69 |
|     |             | ma-TZVP      | 18.44 | 7.21 | 11.23 | 0.20 |
|     | MN15        | maug-cc-pVTZ | 18.18 | 7.92 | 10.25 | 0.68 |
|     |             | jul-cc-pVTZ  | 18.19 | 7.89 | 10.30 | 0.65 |
|     |             | jul-cc-pVTZ  | 18.02 | 7.74 | 10.28 | 0.66 |
|     |             | aug-cc-pVTZ  | 17.93 | 7.67 | 10.26 | 0.68 |
|     | CCSD(T)-F12 | jul-cc-pVTZ  | 13.53 | 3.76 | 9.77  | 0.00 |
|     |             | MG3S         | 12.58 | 2.62 | 9.96  | 0.76 |
|     |             | ma-TZVP      | 14.22 | 3.21 | 11.02 | 0.83 |
|     | M08-HX      | maug-cc-pVTZ | 13.33 | 3.61 | 9.71  | 0.14 |
|     |             | jul-cc-pVTZ  | 13.26 | 3.50 | 9.76  | 0.18 |
|     |             | jul-cc-pVTZ  | 13.24 | 3.50 | 9.74  | 0.19 |
|     |             | aug-cc-pVTZ  | 13.14 | 3.43 | 9.71  | 0.26 |
| R3a |             | MG3S         | 12.53 | 3.63 | 8.90  | 0.67 |
|     |             | ma-TZVP      | 14.31 | 3.92 | 10.39 | 0.52 |
|     | M08-SO      | maug-cc-pVTZ | 13.98 | 4.55 | 9.43  | 0.53 |
|     |             | jul-cc-pVTZ  | 13.95 | 4.43 | 9.52  | 0.45 |
|     |             | jul-cc-pVTZ  | 13.83 | 4.37 | 9.47  | 0.41 |
|     |             | aug-cc-pVTZ  | 13.74 | 4.31 | 9.43  | 0.37 |
|     | M06-2X      | MG3S         | 11.18 | 1.21 | 9.97  | 1.70 |
|     |             | ma-TZVP      | 12.01 | 1.37 | 10.64 | 1.59 |

|            |             |              |       |      |       |      |
|------------|-------------|--------------|-------|------|-------|------|
| <b>R3b</b> |             | maug-cc-pVTZ | 11.46 | 1.97 | 9.49  | 1.38 |
|            |             | jun-cc-pVTZ  | 11.45 | 1.89 | 9.56  | 1.39 |
|            |             | jul-cc-pVTZ  | 11.40 | 1.90 | 9.50  | 1.42 |
|            |             | aug-cc-pVTZ  | 11.33 | 1.89 | 9.45  | 1.46 |
|            | M05-2X      | MG3S         | 11.84 | 1.27 | 10.57 | 1.66 |
|            |             | ma-TZVP      | 12.61 | 1.10 | 11.51 | 1.77 |
|            |             | maug-cc-pVTZ | 11.99 | 1.89 | 10.11 | 1.25 |
|            |             | jun-cc-pVTZ  | 11.96 | 1.81 | 10.15 | 1.30 |
|            |             | jul-cc-pVTZ  | 11.91 | 1.84 | 10.07 | 1.28 |
|            |             | aug-cc-pVTZ  | 11.81 | 1.81 | 10.00 | 1.30 |
|            | MN15        | MG3S         | 11.52 | 3.19 | 8.33  | 1.34 |
|            |             | ma-TZVP      | 12.54 | 3.20 | 9.34  | 0.66 |
|            |             | maug-cc-pVTZ | 12.38 | 3.99 | 8.39  | 0.92 |
|            |             | jun-cc-pVTZ  | 12.36 | 3.92 | 8.44  | 0.89 |
|            |             | jul-cc-pVTZ  | 12.17 | 3.76 | 8.42  | 0.91 |
|            |             | aug-cc-pVTZ  | 12.03 | 3.68 | 8.35  | 1.00 |
|            | CCSD(T)-F12 | jun-cc-pVTZ  | 18.20 | 7.76 | 10.43 | 0.00 |
|            | M08-HX      | MG3S         | 17.68 | 6.96 | 10.72 | 0.53 |
|            |             | ma-TZVP      | 19.07 | 7.40 | 11.67 | 0.82 |
|            |             | maug-cc-pVTZ | 18.18 | 7.76 | 10.42 | 0.01 |
|            |             | jun-cc-pVTZ  | 18.16 | 7.70 | 10.46 | 0.05 |
|            |             | jul-cc-pVTZ  | 18.11 | 7.68 | 10.44 | 0.06 |
|            |             | aug-cc-pVTZ  | 18.00 | 7.58 | 10.42 | 0.13 |
|            | M08-SO      | MG3S         | 18.15 | 8.29 | 9.86  | 0.38 |
|            |             | ma-TZVP      | 19.54 | 8.32 | 11.22 | 0.89 |
|            |             | maug-cc-pVTZ | 19.19 | 8.91 | 10.29 | 0.76 |
|            |             | jun-cc-pVTZ  | 19.22 | 8.86 | 10.36 | 0.73 |
|            |             | jul-cc-pVTZ  | 19.10 | 8.79 | 10.31 | 0.69 |

|           |        |                         |       |      |       |      |
|-----------|--------|-------------------------|-------|------|-------|------|
| <b>R4</b> | M06-2X | aug-cc-pVTZ             | 19.03 | 8.73 | 10.30 | 0.64 |
|           |        | MG3S                    | 16.35 | 5.68 | 10.67 | 1.39 |
|           |        | ma-TZVP                 | 17.11 | 5.81 | 11.30 | 1.31 |
|           |        | maug-cc-pVTZ            | 16.46 | 6.28 | 10.18 | 1.16 |
|           |        | jun-cc-pVTZ             | 16.49 | 6.24 | 10.25 | 1.14 |
|           |        | jul-cc-pVTZ             | 16.43 | 6.25 | 10.18 | 1.18 |
|           |        | aug-cc-pVTZ             | 16.35 | 6.22 | 10.14 | 1.23 |
|           | M05-2X | MG3S                    | 16.73 | 5.39 | 11.34 | 1.58 |
|           |        | ma-TZVP                 | 17.34 | 5.12 | 12.21 | 1.76 |
|           |        | maug-cc-pVTZ            | 16.65 | 5.81 | 10.83 | 1.30 |
|           |        | jun-cc-pVTZ             | 16.66 | 5.80 | 10.87 | 1.31 |
|           |        | jul-cc-pVTZ             | 16.60 | 5.82 | 10.78 | 1.30 |
|           |        | aug-cc-pVTZ             | 16.50 | 5.77 | 10.72 | 1.33 |
|           | MN15   | MG3S                    | 16.90 | 7.69 | 9.21  | 0.86 |
|           |        | ma-TZVP                 | 17.62 | 7.47 | 10.15 | 0.39 |
|           |        | maug-cc-pVTZ            | 17.40 | 8.19 | 9.21  | 0.81 |
|           |        | jun-cc-pVTZ             | 17.43 | 8.18 | 9.25  | 0.79 |
|           |        | jul-cc-pVTZ             | 17.26 | 8.02 | 9.24  | 0.80 |
|           |        | aug-cc-pVTZ             | 17.17 | 7.96 | 9.20  | 0.82 |
|           | M08-HX | CCSD(T)-F12 jun-cc-pVTZ | 22.20 | 4.98 | 17.22 | 0.00 |
|           |        | MG3S                    | 21.37 | 3.64 | 17.73 | 0.89 |
|           |        | ma-TZVP                 | 22.54 | 4.25 | 18.29 | 0.71 |
|           |        | maug-cc-pVTZ            | 21.82 | 4.16 | 17.66 | 0.54 |
|           |        | jun-cc-pVTZ             | 21.80 | 4.14 | 17.66 | 0.56 |
|           |        | jul-cc-pVTZ             | 21.75 | 4.12 | 17.63 | 0.58 |
|           |        | aug-cc-pVTZ             | 21.67 | 4.06 | 17.60 | 0.61 |
|           | M08-SO | MG3S                    | 20.32 | 3.07 | 17.25 | 1.27 |
|           |        | ma-TZVP                 | 21.15 | 3.45 | 17.70 | 1.02 |



|             |              |              |             |       |       |       |
|-------------|--------------|--------------|-------------|-------|-------|-------|
|             |              | maug-cc-pVTZ | 21.20       | 3.71  | 17.49 | 0.85  |
|             |              | jun-cc-pVTZ  | 21.22       | 3.69  | 17.53 | 0.86  |
|             |              | jul-cc-pVTZ  | 21.14       | 3.61  | 17.54 | 0.92  |
|             |              | aug-cc-pVTZ  | 21.09       | 3.57  | 17.52 | 0.94  |
|             | M06-2X       | MG3S         | 18.78       | 1.66  | 17.12 | 2.28  |
|             |              | ma-TZVP      | 19.51       | 2.05  | 17.47 | 1.95  |
|             |              | maug-cc-pVTZ | 19.03       | 2.06  | 16.98 | 2.11  |
|             |              | jun-cc-pVTZ  | 19.05       | 2.06  | 16.99 | 2.10  |
|             |              | jul-cc-pVTZ  | 19.01       | 2.07  | 16.95 | 2.12  |
|             |              | aug-cc-pVTZ  | 18.96       | 2.04  | 16.92 | 2.16  |
|             |              | M05-2X       | MG3S        | 20.38 | 2.68  | 17.71 |
|             | ma-TZVP      |              | 20.84       | 2.65  | 18.19 | 1.55  |
|             | maug-cc-pVTZ |              | 20.43       | 2.89  | 17.55 | 1.39  |
|             | jun-cc-pVTZ  |              | 20.44       | 2.89  | 17.54 | 1.39  |
|             | jul-cc-pVTZ  |              | 20.39       | 2.90  | 17.49 | 1.39  |
|             | aug-cc-pVTZ  |              | 20.31       | 2.85  | 17.45 | 1.42  |
|             | MN15         |              | MG3S        | 18.20 | 1.78  | 16.42 |
|             |              | ma-TZVP      | 18.66       | 1.89  | 16.76 | 2.36  |
|             |              | maug-cc-pVTZ | 18.67       | 2.18  | 16.49 | 2.35  |
|             |              | jun-cc-pVTZ  | 18.67       | 2.19  | 16.48 | 2.35  |
|             |              | jul-cc-pVTZ  | 18.59       | 2.12  | 16.48 | 2.40  |
|             |              | aug-cc-pVTZ  | 18.52       | 2.06  | 16.46 | 2.45  |
|             |              | CCSD(T)-F12  | jun-cc-pVTZ | 18.07 | 7.81  | 10.26 |
|             |              | MG3S         | 17.72       | 7.15  | 10.57 | 0.44  |
|             |              | ma-TZVP      | 19.14       | 7.61  | 11.53 | 0.85  |
| <i>Rcpt</i> | M08-HX       | maug-cc-pVTZ | 18.18       | 7.91  | 10.28 | 0.08  |
|             |              | jun-cc-pVTZ  | 18.15       | 7.84  | 10.32 | 0.06  |
|             |              | jul-cc-pVTZ  | 18.10       | 7.81  | 10.29 | 0.02  |

|        |              |       |      |       |      |
|--------|--------------|-------|------|-------|------|
|        | aug-cc-pVTZ  | 17.99 | 7.72 | 10.27 | 0.06 |
| M08-SO | MG3S         | 17.88 | 8.00 | 9.89  | 0.25 |
|        | ma-TZVP      | 19.33 | 8.03 | 11.30 | 0.84 |
|        | maug-cc-pVTZ | 18.85 | 8.51 | 10.34 | 0.52 |
|        | jun-cc-pVTZ  | 18.86 | 8.45 | 10.41 | 0.52 |
|        | jul-cc-pVTZ  | 18.74 | 8.38 | 10.36 | 0.44 |
|        | aug-cc-pVTZ  | 18.66 | 8.33 | 10.33 | 0.39 |
| M06-2X | MG3S         | 16.32 | 5.80 | 10.52 | 1.34 |
|        | ma-TZVP      | 17.08 | 5.94 | 11.14 | 1.24 |
|        | maug-cc-pVTZ | 16.39 | 6.36 | 10.03 | 1.12 |
|        | jun-cc-pVTZ  | 16.40 | 6.31 | 10.09 | 1.11 |
|        | jul-cc-pVTZ  | 16.34 | 6.32 | 10.02 | 1.15 |
|        | aug-cc-pVTZ  | 16.27 | 6.29 | 9.98  | 1.20 |
| M05-2X | MG3S         | 16.69 | 5.52 | 11.17 | 1.53 |
|        | ma-TZVP      | 17.31 | 5.27 | 12.04 | 1.69 |
|        | maug-cc-pVTZ | 16.58 | 5.92 | 10.66 | 1.26 |
|        | jun-cc-pVTZ  | 16.58 | 5.89 | 10.70 | 1.28 |
|        | jul-cc-pVTZ  | 16.52 | 5.91 | 10.61 | 1.27 |
|        | aug-cc-pVTZ  | 16.42 | 5.87 | 10.56 | 1.29 |
| MN15   | MG3S         | 16.85 | 7.79 | 9.05  | 0.82 |
|        | ma-TZVP      | 17.59 | 7.59 | 9.99  | 0.32 |
|        | maug-cc-pVTZ | 17.32 | 8.27 | 9.05  | 0.81 |
|        | jun-cc-pVTZ  | 17.34 | 8.25 | 9.09  | 0.78 |
|        | jul-cc-pVTZ  | 17.18 | 8.10 | 9.08  | 0.79 |
|        | aug-cc-pVTZ  | 17.08 | 8.04 | 9.04  | 0.81 |

### 3. Conformational-rotational-vibrational partition functions

Table S3 Conformational-rotational-vibrational partition functions with the multi-structural torsional (MS-T) approximation, the multi-structural local harmonic (MS-LH) approximation, and the single-structure quasi-harmonic (SS-QH) approximation.

| $T$ (K) | $Q_{\text{con-rovib}}^{\text{MS-T}}$ | $Q_{\text{con-rovib}}^{\text{MS-LH}}$ | $Q_{\text{rovib,l}}^{\text{SS-QH}}$ |
|---------|--------------------------------------|---------------------------------------|-------------------------------------|
| CPL     |                                      |                                       |                                     |
| 200     | 1.51E-91                             | 1.95E-91                              | 3.87E-92                            |
| 250     | 1.07E-71                             | 1.41E-71                              | 2.69E-72                            |
| 300     | 2.41E-58                             | 3.23E-58                              | 6.00E-59                            |
| 350     | 1.06E-48                             | 1.45E-48                              | 2.64E-49                            |
| 400     | 2.25E-41                             | 3.15E-41                              | 5.66E-42                            |
| 450     | 1.38E-35                             | 1.97E-35                              | 3.50E-36                            |
| 500     | 7.08E-31                             | 1.03E-30                              | 1.81E-31                            |
| 550     | 5.97E-27                             | 8.87E-27                              | 1.55E-27                            |
| 600     | 1.30E-23                             | 1.97E-23                              | 3.42E-24                            |
| 650     | 9.96E-21                             | 1.54E-20                              | 2.66E-21                            |
| 700     | 3.36E-18                             | 5.28E-18                              | 9.08E-19                            |
| 750     | 5.84E-16                             | 9.36E-16                              | 1.60E-16                            |
| 800     | 5.93E-14                             | 9.68E-14                              | 1.65E-14                            |
| 850     | 3.86E-12                             | 6.41E-12                              | 1.09E-12                            |
| 900     | 1.73E-10                             | 2.92E-10                              | 4.95E-11                            |
| 950     | 5.63E-09                             | 9.66E-09                              | 1.64E-09                            |
| 1000    | 1.40E-07                             | 2.44E-07                              | 4.13E-08                            |
| 1100    | 4.41E-05                             | 7.94E-05                              | 1.34E-05                            |
| 1200    | 6.77E-03                             | 1.25E-02                              | 2.11E-03                            |
| 1300    | 5.91E-01                             | 1.13E+00                              | 1.89E-01                            |
| 1400    | 3.28E+01                             | 6.42E+01                              | 1.07E+01                            |
| 1500    | 1.26E+03                             | 2.52E+03                              | 4.21E+02                            |

|      |          |          |          |
|------|----------|----------|----------|
| 1600 | 3.54E+04 | 7.28E+04 | 1.21E+04 |
| 1700 | 7.70E+05 | 1.62E+06 | 2.70E+05 |
| 1800 | 1.34E+07 | 2.88E+07 | 4.80E+06 |
| 1900 | 1.93E+08 | 4.24E+08 | 7.04E+07 |
| 2000 | 2.35E+09 | 5.26E+09 | 8.73E+08 |
| SP1  |          |          |          |
| 200  | 2.58E-98 | 4.74E-98 | 1.10E-98 |
| 250  | 1.46E-76 | 2.67E-76 | 5.10E-77 |
| 300  | 7.54E-62 | 1.37E-61 | 2.19E-62 |
| 350  | 3.67E-51 | 6.59E-51 | 9.02E-52 |
| 400  | 5.39E-43 | 9.53E-43 | 1.14E-43 |
| 450  | 1.64E-36 | 2.86E-36 | 3.03E-37 |
| 500  | 3.29E-31 | 5.64E-31 | 5.39E-32 |
| 550  | 9.07E-27 | 1.53E-26 | 1.34E-27 |
| 600  | 5.61E-23 | 9.35E-23 | 7.54E-24 |
| 650  | 1.09E-19 | 1.80E-19 | 1.35E-20 |
| 700  | 8.52E-17 | 1.39E-16 | 9.81E-18 |
| 750  | 3.18E-14 | 5.14E-14 | 3.44E-15 |
| 800  | 6.51E-12 | 1.04E-11 | 6.64E-13 |
| 850  | 8.08E-10 | 1.29E-09 | 7.83E-11 |
| 900  | 6.57E-08 | 1.04E-07 | 6.09E-09 |
| 950  | 3.74E-06 | 5.93E-06 | 3.33E-07 |
| 1000 | 1.57E-04 | 2.48E-04 | 1.35E-05 |
| 1100 | 1.28E-01 | 2.02E-01 | 1.03E-02 |
| 1200 | 4.57E+01 | 7.28E+01 | 3.54E+00 |
| 1300 | 8.57E+03 | 1.38E+04 | 6.41E+02 |
| 1400 | 9.54E+05 | 1.55E+06 | 6.94E+04 |
| 1500 | 6.92E+07 | 1.14E+08 | 4.94E+06 |
| 1600 | 3.51E+09 | 5.86E+09 | 2.47E+08 |

|      |          |          |          |
|------|----------|----------|----------|
| 1700 | 1.32E+11 | 2.24E+11 | 9.17E+09 |
| 1800 | 3.81E+12 | 6.59E+12 | 2.64E+11 |
| 1900 | 8.82E+13 | 1.56E+14 | 6.10E+12 |
| 2000 | 1.68E+15 | 3.02E+15 | 1.16E+14 |
| SP2a |          |          |          |
| 200  | 2.86E-99 | 4.94E-99 | 1.89E-99 |
| 250  | 1.58E-77 | 2.75E-77 | 7.68E-78 |
| 300  | 8.76E-63 | 1.53E-62 | 2.98E-63 |
| 350  | 4.71E-52 | 8.18E-52 | 1.13E-52 |
| 400  | 7.67E-44 | 1.32E-43 | 1.33E-44 |
| 450  | 2.57E-37 | 4.39E-37 | 3.37E-38 |
| 500  | 5.64E-32 | 9.50E-32 | 5.76E-33 |
| 550  | 1.68E-27 | 2.80E-27 | 1.38E-28 |
| 600  | 1.11E-23 | 1.83E-23 | 7.58E-25 |
| 650  | 2.30E-20 | 3.75E-20 | 1.33E-21 |
| 700  | 1.89E-17 | 3.06E-17 | 9.47E-19 |
| 750  | 7.43E-15 | 1.19E-14 | 3.27E-16 |
| 800  | 1.59E-12 | 2.54E-12 | 6.23E-14 |
| 850  | 2.05E-10 | 3.26E-10 | 7.26E-12 |
| 900  | 1.73E-08 | 2.75E-08 | 5.60E-10 |
| 950  | 1.02E-06 | 1.61E-06 | 3.04E-08 |
| 1000 | 4.38E-05 | 6.95E-05 | 1.22E-06 |
| 1100 | 3.77E-02 | 6.00E-02 | 9.25E-04 |
| 1200 | 1.41E+01 | 2.27E+01 | 3.14E-01 |
| 1300 | 2.76E+03 | 4.46E+03 | 5.63E+01 |
| 1400 | 3.18E+05 | 5.21E+05 | 6.06E+03 |
| 1500 | 2.38E+07 | 3.95E+07 | 4.29E+05 |
| 1600 | 1.24E+09 | 2.10E+09 | 2.14E+07 |
| 1700 | 4.78E+10 | 8.20E+10 | 7.91E+08 |

|      |          |          |          |
|------|----------|----------|----------|
| 1800 | 1.42E+12 | 2.47E+12 | 2.27E+10 |
| 1900 | 3.35E+13 | 5.96E+13 | 5.24E+11 |
| 2000 | 6.49E+14 | 1.18E+15 | 9.95E+12 |
| SP2b |          |          |          |
| 200  | 8.47E-97 | 1.32E-96 | 9.93E-98 |
| 250  | 3.32E-75 | 5.00E-75 | 3.33E-76 |
| 300  | 1.29E-60 | 1.90E-60 | 1.16E-61 |
| 350  | 4.95E-50 | 7.23E-50 | 4.11E-51 |
| 400  | 5.95E-42 | 8.64E-42 | 4.65E-43 |
| 450  | 1.53E-35 | 2.22E-35 | 1.14E-36 |
| 500  | 2.65E-30 | 3.85E-30 | 1.92E-31 |
| 550  | 6.43E-26 | 9.38E-26 | 4.53E-27 |
| 600  | 3.55E-22 | 5.22E-22 | 2.46E-23 |
| 650  | 6.26E-19 | 9.27E-19 | 4.28E-20 |
| 700  | 4.47E-16 | 6.69E-16 | 3.03E-17 |
| 750  | 1.54E-13 | 2.34E-13 | 1.04E-14 |
| 800  | 2.94E-11 | 4.50E-11 | 1.98E-12 |
| 850  | 3.41E-09 | 5.30E-09 | 2.30E-10 |
| 900  | 2.62E-07 | 4.12E-07 | 1.77E-08 |
| 950  | 1.41E-05 | 2.26E-05 | 9.57E-07 |
| 1000 | 5.61E-04 | 9.12E-04 | 3.83E-05 |
| 1100 | 4.18E-01 | 7.03E-01 | 2.91E-02 |
| 1200 | 1.39E+02 | 2.41E+02 | 9.84E+00 |
| 1300 | 2.43E+04 | 4.38E+04 | 1.77E+03 |
| 1400 | 2.55E+06 | 4.76E+06 | 1.90E+05 |
| 1500 | 1.75E+08 | 3.40E+08 | 1.34E+07 |
| 1600 | 8.50E+09 | 1.71E+10 | 6.70E+08 |
| 1700 | 3.06E+11 | 6.36E+11 | 2.48E+10 |
| 1800 | 8.52E+12 | 1.84E+13 | 7.12E+11 |

|      |          |          |          |
|------|----------|----------|----------|
| 1900 | 1.91E+14 | 4.26E+14 | 1.64E+13 |
| 2000 | 3.51E+15 | 8.14E+15 | 3.12E+14 |
| SP3a |          |          |          |
| 200  | 2.93E-99 | 4.74E-99 | 2.08E-99 |
| 250  | 1.37E-77 | 2.15E-77 | 8.32E-78 |
| 300  | 6.48E-63 | 9.82E-63 | 3.19E-63 |
| 350  | 3.10E-52 | 4.57E-52 | 1.20E-52 |
| 400  | 4.74E-44 | 6.89E-44 | 1.40E-44 |
| 450  | 1.55E-37 | 2.26E-37 | 3.52E-38 |
| 500  | 3.40E-32 | 5.04E-32 | 5.99E-33 |
| 550  | 1.03E-27 | 1.57E-27 | 1.43E-28 |
| 600  | 7.00E-24 | 1.10E-23 | 7.80E-25 |
| 650  | 1.49E-20 | 2.43E-20 | 1.36E-21 |
| 700  | 1.27E-17 | 2.14E-17 | 9.66E-19 |
| 750  | 5.11E-15 | 8.95E-15 | 3.32E-16 |
| 800  | 1.12E-12 | 2.04E-12 | 6.31E-14 |
| 850  | 1.48E-10 | 2.79E-10 | 7.34E-12 |
| 900  | 1.28E-08 | 2.50E-08 | 5.64E-10 |
| 950  | 7.69E-07 | 1.55E-06 | 3.05E-08 |
| 1000 | 3.38E-05 | 7.06E-05 | 1.22E-06 |
| 1100 | 3.00E-02 | 6.68E-02 | 9.25E-04 |
| 1200 | 1.16E+01 | 2.74E+01 | 3.13E-01 |
| 1300 | 2.30E+03 | 5.78E+03 | 5.60E+01 |
| 1400 | 2.70E+05 | 7.17E+05 | 6.02E+03 |
| 1500 | 2.05E+07 | 5.74E+07 | 4.25E+05 |
| 1600 | 1.08E+09 | 3.19E+09 | 2.11E+07 |
| 1700 | 4.21E+10 | 1.30E+11 | 7.82E+08 |
| 1800 | 1.26E+12 | 4.08E+12 | 2.24E+10 |
| 1900 | 2.99E+13 | 1.02E+14 | 5.16E+11 |

|      |          |          |          |
|------|----------|----------|----------|
| 2000 | 5.83E+14 | 2.07E+15 | 9.81E+12 |
| SP3b |          |          |          |
| 200  | 6.24E-97 | 9.31E-97 | 5.32E-98 |
| 250  | 2.45E-75 | 3.53E-75 | 1.80E-76 |
| 300  | 9.63E-61 | 1.34E-60 | 6.29E-62 |
| 350  | 3.76E-50 | 5.11E-50 | 2.24E-51 |
| 400  | 4.60E-42 | 6.11E-42 | 2.55E-43 |
| 450  | 1.20E-35 | 1.57E-35 | 6.27E-37 |
| 500  | 2.12E-30 | 2.72E-30 | 1.05E-31 |
| 550  | 5.23E-26 | 6.64E-26 | 2.49E-27 |
| 600  | 2.93E-22 | 3.69E-22 | 1.35E-23 |
| 650  | 5.23E-19 | 6.56E-19 | 2.36E-20 |
| 700  | 3.78E-16 | 4.73E-16 | 1.67E-17 |
| 750  | 1.32E-13 | 1.65E-13 | 5.73E-15 |
| 800  | 2.54E-11 | 3.18E-11 | 1.09E-12 |
| 850  | 2.98E-09 | 3.74E-09 | 1.27E-10 |
| 900  | 2.31E-07 | 2.91E-07 | 9.74E-09 |
| 950  | 1.26E-05 | 1.59E-05 | 5.27E-07 |
| 1000 | 5.04E-04 | 6.43E-04 | 2.11E-05 |
| 1100 | 3.81E-01 | 4.95E-01 | 1.60E-02 |
| 1200 | 1.28E+02 | 1.70E+02 | 5.41E+00 |
| 1300 | 2.27E+04 | 3.08E+04 | 9.71E+02 |
| 1400 | 2.41E+06 | 3.35E+06 | 1.05E+05 |
| 1500 | 1.67E+08 | 2.39E+08 | 7.39E+06 |
| 1600 | 8.16E+09 | 1.20E+10 | 3.68E+08 |
| 1700 | 2.96E+11 | 4.47E+11 | 1.36E+10 |
| 1800 | 8.29E+12 | 1.29E+13 | 3.91E+11 |
| 1900 | 1.87E+14 | 2.99E+14 | 9.01E+12 |
| 2000 | 3.46E+15 | 5.72E+15 | 1.71E+14 |



| SP4  |          |          |          |
|------|----------|----------|----------|
| 200  | 9.23E-97 | 1.42E-96 | 3.81E-97 |
| 250  | 3.52E-75 | 5.27E-75 | 1.21E-75 |
| 300  | 1.36E-60 | 1.98E-60 | 3.98E-61 |
| 350  | 5.20E-50 | 7.39E-50 | 1.34E-50 |
| 400  | 6.27E-42 | 8.70E-42 | 1.45E-42 |
| 450  | 1.62E-35 | 2.19E-35 | 3.42E-36 |
| 500  | 2.82E-30 | 3.74E-30 | 5.52E-31 |
| 550  | 6.88E-26 | 8.97E-26 | 1.26E-26 |
| 600  | 3.83E-22 | 4.91E-22 | 6.62E-23 |
| 650  | 6.80E-19 | 8.59E-19 | 1.12E-19 |
| 700  | 4.90E-16 | 6.11E-16 | 7.71E-17 |
| 750  | 1.70E-13 | 2.10E-13 | 2.58E-14 |
| 800  | 3.27E-11 | 4.00E-11 | 4.80E-12 |
| 850  | 3.84E-09 | 4.66E-09 | 5.47E-10 |
| 900  | 2.97E-07 | 3.58E-07 | 4.13E-08 |
| 950  | 1.61E-05 | 1.94E-05 | 2.20E-06 |
| 1000 | 6.48E-04 | 7.77E-04 | 8.67E-05 |
| 1100 | 4.91E-01 | 5.89E-01 | 6.40E-02 |
| 1200 | 1.66E+02 | 1.99E+02 | 2.12E+01 |
| 1300 | 2.95E+04 | 3.58E+04 | 3.73E+03 |
| 1400 | 3.15E+06 | 3.85E+06 | 3.95E+05 |
| 1500 | 2.20E+08 | 2.73E+08 | 2.75E+07 |
| 1600 | 1.08E+10 | 1.36E+10 | 1.35E+09 |
| 1700 | 3.93E+11 | 5.03E+11 | 4.96E+10 |
| 1800 | 1.11E+13 | 1.45E+13 | 1.41E+12 |
| 1900 | 2.51E+14 | 3.34E+14 | 3.23E+13 |
| 2000 | 4.69E+15 | 6.36E+15 | 6.10E+14 |

SPc<sub>pt</sub>

|      |          |          |          |
|------|----------|----------|----------|
| 200  | 1.66E-94 | 2.67E-94 | 6.13E-95 |
| 250  | 1.14E-73 | 1.82E-73 | 3.94E-74 |
| 300  | 1.31E-59 | 2.05E-59 | 4.25E-60 |
| 350  | 2.01E-49 | 3.08E-49 | 6.20E-50 |
| 400  | 1.17E-41 | 1.76E-41 | 3.46E-42 |
| 450  | 1.66E-35 | 2.46E-35 | 4.74E-36 |
| 500  | 1.75E-30 | 2.55E-30 | 4.83E-31 |
| 550  | 2.76E-26 | 3.98E-26 | 7.44E-27 |
| 600  | 1.05E-22 | 1.49E-22 | 2.77E-23 |
| 650  | 1.33E-19 | 1.87E-19 | 3.43E-20 |
| 700  | 7.08E-17 | 9.87E-17 | 1.79E-17 |
| 750  | 1.87E-14 | 2.59E-14 | 4.68E-15 |
| 800  | 2.80E-12 | 3.85E-12 | 6.90E-13 |
| 850  | 2.60E-10 | 3.56E-10 | 6.35E-11 |
| 900  | 1.63E-08 | 2.22E-08 | 3.93E-09 |
| 950  | 7.25E-07 | 9.85E-07 | 1.74E-07 |
| 1000 | 2.42E-05 | 3.28E-05 | 5.77E-06 |
| 1100 | 1.31E-02 | 1.77E-02 | 3.10E-03 |
| 1200 | 3.27E+00 | 4.44E+00 | 7.72E-01 |
| 1300 | 4.44E+02 | 6.06E+02 | 1.05E+02 |
| 1400 | 3.70E+04 | 5.08E+04 | 8.76E+03 |
| 1500 | 2.06E+06 | 2.86E+06 | 4.90E+05 |
| 1600 | 8.22E+07 | 1.15E+08 | 1.97E+07 |
| 1700 | 2.47E+09 | 3.50E+09 | 5.96E+08 |
| 1800 | 5.82E+10 | 8.34E+10 | 1.42E+10 |
| 1900 | 1.11E+12 | 1.62E+12 | 2.74E+11 |
| 2000 | 1.77E+13 | 2.61E+13 | 4.42E+12 |

---

#### 4. Multistructural torsional anharmonicity factors

Table S4 Multistructural torsional anharmonicity (MS-T) factors for cyclopentanol and saddle points in cyclopentanol + HO<sub>2</sub> and cyclopentane +HO<sub>2</sub>.

| <i>T</i> (K) | cyclopentanol | SP1   | SP2a  | SP2b  | SP3a  | SP3b  | SP4  | SP <sub>cpt</sub> |
|--------------|---------------|-------|-------|-------|-------|-------|------|-------------------|
| 200          | 3.91          | 2.35  | 1.51  | 8.53  | 1.41  | 11.72 | 2.42 | 2.70              |
| 250          | 3.99          | 2.86  | 2.06  | 9.96  | 1.65  | 13.62 | 2.92 | 2.91              |
| 300          | 4.01          | 3.43  | 2.94  | 11.12 | 2.03  | 15.30 | 3.41 | 3.08              |
| 350          | 4.01          | 4.07  | 4.18  | 12.05 | 2.60  | 16.78 | 3.87 | 3.24              |
| 400          | 3.98          | 4.73  | 5.76  | 12.79 | 3.38  | 18.07 | 4.32 | 3.38              |
| 450          | 3.95          | 5.42  | 7.64  | 13.38 | 4.40  | 19.19 | 4.73 | 3.51              |
| 500          | 3.90          | 6.10  | 9.78  | 13.83 | 5.69  | 20.14 | 5.11 | 3.62              |
| 550          | 3.85          | 6.78  | 12.14 | 14.19 | 7.22  | 20.96 | 5.46 | 3.72              |
| 600          | 3.80          | 7.44  | 14.65 | 14.45 | 8.98  | 21.64 | 5.79 | 3.80              |
| 650          | 3.75          | 8.08  | 17.29 | 14.63 | 10.95 | 22.21 | 6.09 | 3.88              |
| 700          | 3.69          | 8.69  | 19.99 | 14.76 | 13.10 | 22.68 | 6.36 | 3.95              |
| 750          | 3.64          | 9.27  | 22.73 | 14.83 | 15.38 | 23.05 | 6.60 | 4.01              |
| 800          | 3.59          | 9.81  | 25.47 | 14.85 | 17.76 | 23.34 | 6.82 | 4.06              |
| 850          | 3.54          | 10.32 | 28.19 | 14.84 | 20.21 | 23.56 | 7.01 | 4.10              |
| 900          | 3.49          | 10.79 | 30.86 | 14.79 | 22.69 | 23.72 | 7.19 | 4.13              |
| 950          | 3.44          | 11.23 | 33.46 | 14.72 | 25.18 | 23.81 | 7.34 | 4.16              |
| 1000         | 3.39          | 11.63 | 35.98 | 14.63 | 27.65 | 23.86 | 7.47 | 4.19              |
| 1100         | 3.30          | 12.33 | 40.75 | 14.38 | 32.46 | 23.83 | 7.68 | 4.22              |
| 1200         | 3.21          | 12.91 | 45.10 | 14.09 | 36.98 | 23.65 | 7.83 | 4.23              |
| 1300         | 3.13          | 13.38 | 49.00 | 13.76 | 41.14 | 23.38 | 7.92 | 4.23              |
| 1400         | 3.06          | 13.74 | 52.47 | 13.41 | 44.91 | 23.03 | 7.97 | 4.22              |
| 1500         | 2.98          | 14.01 | 55.50 | 13.05 | 48.27 | 22.62 | 7.98 | 4.20              |
| 1600         | 2.92          | 14.21 | 58.14 | 12.69 | 51.22 | 22.17 | 7.96 | 4.17              |
| 1700         | 2.86          | 14.35 | 60.40 | 12.32 | 53.78 | 21.70 | 7.92 | 4.14              |
| 1800         | 2.80          | 14.42 | 62.32 | 11.97 | 55.99 | 21.20 | 7.86 | 4.10              |

|      |      |       |       |       |       |       |      |      |
|------|------|-------|-------|-------|-------|-------|------|------|
| 1900 | 2.74 | 14.45 | 63.93 | 11.61 | 57.86 | 20.70 | 7.78 | 4.05 |
| 2000 | 2.69 | 14.44 | 65.26 | 11.27 | 59.42 | 20.20 | 7.68 | 4.01 |

Table S5 Multistructural local harmonic (MS-LH) factors for cyclopentanol and saddle points in cyclopentanol + HO<sub>2</sub> and cyclopentane +HO<sub>2</sub>.

| <i>T</i> (K) | cyclopentanol | SP1    | SP2a   | SP2b   | SP3a    | SP3b   | SP4    | SP <sub>cpt</sub> |
|--------------|---------------|--------|--------|--------|---------|--------|--------|-------------------|
| 200          | 5.037         | 4.318  | 2.611  | 13.246 | 2.278   | 17.483 | 3.714  | 4.348             |
| 250          | 5.24          | 5.238  | 3.574  | 15.024 | 2.586   | 19.626 | 4.363  | 4.615             |
| 300          | 5.382         | 6.248  | 5.125  | 16.445 | 3.079   | 21.369 | 4.965  | 4.815             |
| 350          | 5.486         | 7.306  | 7.26   | 17.606 | 3.825   | 22.803 | 5.507  | 4.97              |
| 400          | 5.565         | 8.376  | 9.921  | 18.572 | 4.908   | 23.998 | 5.988  | 5.093             |
| 450          | 5.628         | 9.433  | 13.025 | 19.385 | 6.414   | 25.008 | 6.412  | 5.193             |
| 500          | 5.678         | 10.462 | 16.484 | 20.08  | 8.416   | 25.871 | 6.788  | 5.276             |
| 550          | 5.72          | 11.452 | 20.215 | 20.68  | 10.968  | 26.616 | 7.121  | 5.346             |
| 600          | 5.755         | 12.399 | 24.143 | 21.203 | 14.1    | 27.266 | 7.418  | 5.405             |
| 650          | 5.785         | 13.299 | 28.207 | 21.663 | 17.817  | 27.838 | 7.684  | 5.456             |
| 700          | 5.811         | 14.154 | 32.353 | 22.07  | 22.106  | 28.345 | 7.923  | 5.5               |
| 750          | 5.833         | 14.963 | 36.54  | 22.434 | 26.939  | 28.797 | 8.138  | 5.539             |
| 800          | 5.852         | 15.728 | 40.733 | 22.76  | 32.276  | 29.203 | 8.334  | 5.574             |
| 850          | 5.87          | 16.452 | 44.905 | 23.054 | 38.072  | 29.57  | 8.512  | 5.605             |
| 900          | 5.885         | 17.137 | 49.035 | 23.321 | 44.278  | 29.902 | 8.674  | 5.632             |
| 950          | 5.899         | 17.784 | 53.107 | 23.565 | 50.845  | 30.206 | 8.823  | 5.657             |
| 1000         | 5.911         | 18.397 | 57.108 | 23.788 | 57.723  | 30.483 | 8.961  | 5.68              |
| 1100         | 5.932         | 19.528 | 64.864 | 24.181 | 72.233  | 30.973 | 9.205  | 5.719             |
| 1200         | 5.95          | 20.544 | 72.258 | 24.518 | 87.471  | 31.393 | 9.415  | 5.752             |
| 1300         | 5.964         | 21.462 | 79.271 | 24.81  | 103.154 | 31.756 | 9.598  | 5.78              |
| 1400         | 5.977         | 22.293 | 85.902 | 25.065 | 119.055 | 32.074 | 9.759  | 5.805             |
| 1500         | 5.988         | 23.049 | 92.161 | 25.29  | 134.993 | 32.354 | 9.901  | 5.826             |
| 1600         | 5.998         | 23.739 | 98.062 | 25.49  | 150.829 | 32.603 | 10.028 | 5.845             |

|      |       |        |         |        |         |        |        |       |
|------|-------|--------|---------|--------|---------|--------|--------|-------|
| 1700 | 6.006 | 24.37  | 103.624 | 25.669 | 166.459 | 32.826 | 10.142 | 5.861 |
| 1800 | 6.013 | 24.95  | 108.867 | 25.83  | 181.807 | 33.026 | 10.244 | 5.876 |
| 1900 | 6.02  | 25.484 | 113.812 | 25.976 | 196.816 | 33.208 | 10.337 | 5.89  |
| 2000 | 6.026 | 25.978 | 118.479 | 26.109 | 211.448 | 33.373 | 10.422 | 5.902 |

Table S6 Multistructural torsional anharmonicity (MS-T) factors for each studied reaction.

| <i>T</i> (K) | R1   | R2a   | R2b  | R3a   | R3b  | R4   | <i>Rcpt</i> |
|--------------|------|-------|------|-------|------|------|-------------|
| 200          | 0.60 | 0.39  | 2.18 | 0.36  | 2.99 | 0.62 | 2.70        |
| 250          | 0.72 | 0.52  | 2.50 | 0.41  | 3.42 | 0.73 | 2.91        |
| 300          | 0.86 | 0.73  | 2.77 | 0.51  | 3.81 | 0.85 | 3.08        |
| 350          | 1.02 | 1.04  | 3.01 | 0.65  | 4.19 | 0.97 | 3.24        |
| 400          | 1.19 | 1.45  | 3.21 | 0.85  | 4.54 | 1.08 | 3.38        |
| 450          | 1.37 | 1.94  | 3.39 | 1.12  | 4.86 | 1.20 | 3.51        |
| 500          | 1.56 | 2.51  | 3.55 | 1.46  | 5.16 | 1.31 | 3.62        |
| 550          | 1.76 | 3.15  | 3.68 | 1.87  | 5.44 | 1.42 | 3.72        |
| 600          | 1.96 | 3.86  | 3.80 | 2.36  | 5.70 | 1.52 | 3.80        |
| 650          | 2.16 | 4.61  | 3.91 | 2.92  | 5.93 | 1.62 | 3.88        |
| 700          | 2.35 | 5.41  | 4.00 | 3.55  | 6.14 | 1.72 | 3.95        |
| 750          | 2.55 | 6.24  | 4.07 | 4.22  | 6.33 | 1.81 | 4.01        |
| 800          | 2.74 | 7.10  | 4.14 | 4.95  | 6.51 | 1.90 | 4.06        |
| 850          | 2.92 | 7.97  | 4.20 | 5.72  | 6.67 | 1.98 | 4.10        |
| 900          | 3.10 | 8.85  | 4.24 | 6.51  | 6.81 | 2.06 | 4.13        |
| 950          | 3.27 | 9.74  | 4.28 | 7.33  | 6.93 | 2.14 | 4.16        |
| 1000         | 3.43 | 10.62 | 4.32 | 8.16  | 7.04 | 2.20 | 4.19        |
| 1100         | 3.74 | 12.36 | 4.36 | 9.85  | 7.23 | 2.33 | 4.22        |
| 1200         | 4.02 | 14.04 | 4.39 | 11.52 | 7.37 | 2.44 | 4.23        |
| 1300         | 4.27 | 15.66 | 4.40 | 13.14 | 7.47 | 2.53 | 4.23        |
| 1400         | 4.50 | 17.17 | 4.39 | 14.70 | 7.54 | 2.61 | 4.22        |
| 1500         | 4.70 | 18.60 | 4.37 | 16.17 | 7.58 | 2.67 | 4.20        |

|      |      |       |      |       |      |      |      |
|------|------|-------|------|-------|------|------|------|
| 1600 | 4.87 | 19.92 | 4.35 | 17.55 | 7.60 | 2.73 | 4.17 |
| 1700 | 5.02 | 21.16 | 4.32 | 18.84 | 7.60 | 2.77 | 4.14 |
| 1800 | 5.16 | 22.29 | 4.28 | 20.02 | 7.58 | 2.81 | 4.10 |
| 1900 | 5.27 | 23.32 | 4.24 | 21.11 | 7.55 | 2.84 | 4.05 |
| 2000 | 5.37 | 24.28 | 4.19 | 22.11 | 7.51 | 2.86 | 4.01 |

Table S7 Multistructural local harmonic (MS-LH) factors for each studied reaction.

| <i>T</i> (K) | R1   | R2a   | R2b  | R3a   | R3b  | R4   | <i>R<sub>cpt</sub></i> |
|--------------|------|-------|------|-------|------|------|------------------------|
| 200          | 0.86 | 0.52  | 2.63 | 0.45  | 3.47 | 0.74 | 4.35                   |
| 250          | 1.00 | 0.68  | 2.87 | 0.49  | 3.75 | 0.83 | 4.62                   |
| 300          | 1.16 | 0.95  | 3.06 | 0.57  | 3.97 | 0.92 | 4.82                   |
| 350          | 1.33 | 1.32  | 3.21 | 0.70  | 4.16 | 1.00 | 4.97                   |
| 400          | 1.51 | 1.78  | 3.34 | 0.88  | 4.31 | 1.08 | 5.09                   |
| 450          | 1.68 | 2.31  | 3.44 | 1.14  | 4.44 | 1.14 | 5.19                   |
| 500          | 1.84 | 2.90  | 3.54 | 1.48  | 4.56 | 1.20 | 5.28                   |
| 550          | 2.00 | 3.53  | 3.62 | 1.92  | 4.65 | 1.24 | 5.35                   |
| 600          | 2.15 | 4.20  | 3.68 | 2.45  | 4.74 | 1.29 | 5.41                   |
| 650          | 2.30 | 4.88  | 3.74 | 3.08  | 4.81 | 1.33 | 5.46                   |
| 700          | 2.44 | 5.57  | 3.80 | 3.80  | 4.88 | 1.36 | 5.50                   |
| 750          | 2.57 | 6.26  | 3.85 | 4.62  | 4.94 | 1.40 | 5.54                   |
| 800          | 2.69 | 6.96  | 3.89 | 5.52  | 4.99 | 1.42 | 5.57                   |
| 850          | 2.80 | 7.65  | 3.93 | 6.49  | 5.04 | 1.45 | 5.61                   |
| 900          | 2.91 | 8.33  | 3.96 | 7.52  | 5.08 | 1.47 | 5.63                   |
| 950          | 3.01 | 9.00  | 3.99 | 8.62  | 5.12 | 1.50 | 5.66                   |
| 1000         | 3.11 | 9.66  | 4.02 | 9.77  | 5.16 | 1.52 | 5.68                   |
| 1100         | 3.29 | 10.93 | 4.08 | 12.18 | 5.22 | 1.55 | 5.72                   |
| 1200         | 3.45 | 12.14 | 4.12 | 14.70 | 5.28 | 1.58 | 5.75                   |
| 1300         | 3.60 | 13.29 | 4.16 | 17.30 | 5.32 | 1.61 | 5.78                   |
| 1400         | 3.73 | 14.37 | 4.19 | 19.92 | 5.37 | 1.63 | 5.81                   |

|      |      |       |      |       |      |      |      |
|------|------|-------|------|-------|------|------|------|
| 1500 | 3.85 | 15.39 | 4.22 | 22.54 | 5.40 | 1.65 | 5.83 |
| 1600 | 3.96 | 16.35 | 4.25 | 25.15 | 5.44 | 1.67 | 5.85 |
| 1700 | 4.06 | 17.25 | 4.27 | 27.72 | 5.47 | 1.69 | 5.86 |
| 1800 | 4.15 | 18.11 | 4.30 | 30.24 | 5.49 | 1.70 | 5.88 |
| 1900 | 4.23 | 18.91 | 4.31 | 32.69 | 5.52 | 1.72 | 5.89 |
| 2000 | 4.31 | 19.66 | 4.33 | 35.09 | 5.54 | 1.73 | 5.90 |

---

## 5. Thermodynamic properties for reactant and each transition state using three models

Table S8 Standard-state entropy ( $S_T^\ominus$ ), heat capacity ( $C_p^\ominus(T)$ ) and relative enthalpy ( $H_p^\ominus(T)$ )<sup>a</sup> of cyclopentanol and each transition state calculated using three models of torsional anharmonicity.

| $T$ (K) | $S_T^\ominus$ (cal/mol/K) |       |                    | $C_p^\ominus(T)$ (cal/mol/K) |       |                    | $H_p^\ominus(T)$ (kcal/mol) |       |                    |
|---------|---------------------------|-------|--------------------|------------------------------|-------|--------------------|-----------------------------|-------|--------------------|
|         | MS-T                      | MS-LH | SS-QH <sup>b</sup> | MS-T                         | MS-LH | SS-QH <sup>b</sup> | MS-T                        | MS-LH | SS-QH <sup>b</sup> |
| CPL     |                           |       |                    |                              |       |                    |                             |       |                    |
| 200     | 74.3                      | 75.0  | 72.7               | 17.6                         | 17.9  | 17.9               | 91.5                        | 91.5  | 91.5               |
| 250     | 78.6                      | 79.4  | 77.1               | 21.2                         | 21.6  | 21.6               | 92.5                        | 92.5  | 92.4               |
| 300     | 82.8                      | 83.7  | 81.4               | 25.3                         | 25.8  | 25.8               | 93.6                        | 93.7  | 93.6               |
| 350     | 87.1                      | 88.0  | 85.7               | 29.6                         | 30.2  | 30.2               | 95.0                        | 95.1  | 95.0               |
| 400     | 91.3                      | 92.3  | 90.0               | 33.9                         | 34.5  | 34.5               | 96.6                        | 96.7  | 96.6               |
| 450     | 95.5                      | 96.6  | 94.3               | 37.9                         | 38.6  | 38.6               | 98.4                        | 98.6  | 98.5               |
| 500     | 99.7                      | 100.8 | 98.6               | 41.6                         | 42.3  | 42.3               | 100.4                       | 100.6 | 100.5              |
| 550     | 103.8                     | 105.0 | 102.8              | 44.9                         | 45.7  | 45.7               | 102.5                       | 102.8 | 102.7              |
| 600     | 107.9                     | 109.1 | 106.9              | 48.0                         | 48.8  | 48.8               | 104.9                       | 105.1 | 105.1              |
| 650     | 111.8                     | 113.2 | 110.9              | 50.8                         | 51.6  | 51.6               | 107.3                       | 107.7 | 107.6              |
| 700     | 115.7                     | 117.1 | 114.8              | 53.3                         | 54.2  | 54.2               | 109.9                       | 110.3 | 110.2              |
| 750     | 119.4                     | 120.9 | 118.7              | 55.6                         | 56.5  | 56.5               | 112.7                       | 113.1 | 113.0              |
| 800     | 123.1                     | 124.6 | 122.4              | 57.8                         | 58.7  | 58.7               | 115.5                       | 115.9 | 115.9              |
| 850     | 126.6                     | 128.2 | 126.0              | 59.8                         | 60.7  | 60.7               | 118.4                       | 118.9 | 118.8              |
| 900     | 130.1                     | 131.8 | 129.5              | 61.6                         | 62.5  | 62.5               | 121.5                       | 122.0 | 121.9              |
| 950     | 133.5                     | 135.2 | 132.9              | 63.3                         | 64.2  | 64.2               | 124.6                       | 125.2 | 125.1              |
| 1000    | 136.8                     | 138.5 | 136.3              | 64.8                         | 65.8  | 65.8               | 127.8                       | 128.4 | 128.3              |
| 1100    | 143.1                     | 144.9 | 142.7              | 67.6                         | 68.6  | 68.6               | 134.4                       | 135.1 | 135.1              |
| 1200    | 149.1                     | 151.0 | 148.8              | 70.0                         | 71.0  | 71.0               | 141.3                       | 142.1 | 142.0              |
| 1300    | 154.8                     | 156.7 | 154.5              | 72.1                         | 73.1  | 73.1               | 148.4                       | 149.3 | 149.3              |
| 1400    | 160.2                     | 162.2 | 160.0              | 74.0                         | 74.9  | 74.9               | 155.7                       | 156.7 | 156.7              |
| 1500    | 165.3                     | 167.5 | 165.2              | 75.6                         | 76.5  | 76.5               | 163.2                       | 164.3 | 164.2              |
| 1600    | 170.3                     | 172.4 | 170.2              | 76.9                         | 77.9  | 77.9               | 170.8                       | 172.0 | 172.0              |
| 1700    | 175.0                     | 177.2 | 175.0              | 78.2                         | 79.1  | 79.1               | 178.6                       | 179.9 | 179.8              |
| 1800    | 179.5                     | 181.8 | 179.5              | 79.2                         | 80.2  | 80.2               | 186.5                       | 187.9 | 187.8              |
| 1900    | 183.8                     | 186.1 | 183.9              | 80.2                         | 81.2  | 81.2               | 194.4                       | 195.9 | 195.8              |
| 2000    | 187.9                     | 190.3 | 188.1              | 81.0                         | 82.0  | 82.0               | 202.5                       | 204.1 | 204.0              |
| SP1     |                           |       |                    |                              |       |                    |                             |       |                    |
| 200     | 87.8                      | 89.0  | 85.9               | 29.1                         | 28.9  | 26.1               | 99.9                        | 99.9  | 99.6               |
| 250     | 94.8                      | 96.0  | 92.2               | 34.1                         | 33.7  | 30.9               | 101.5                       | 101.5 | 101.0              |
| 300     | 101.5                     | 102.5 | 98.3               | 39.0                         | 38.4  | 35.9               | 103.3                       | 103.3 | 102.7              |
| 350     | 107.9                     | 108.8 | 104.2              | 43.8                         | 43.2  | 41.0               | 105.4                       | 105.3 | 104.6              |
| 400     | 114.0                     | 114.9 | 110.0              | 48.3                         | 47.7  | 45.9               | 107.7                       | 107.6 | 106.8              |
| 450     | 119.9                     | 120.8 | 115.7              | 52.6                         | 52.0  | 50.5               | 110.2                       | 110.1 | 109.2              |
| 500     | 125.7                     | 126.5 | 121.2              | 56.4                         | 55.9  | 54.7               | 113.0                       | 112.8 | 111.8              |
| 550     | 131.2                     | 132.0 | 126.6              | 59.8                         | 59.5  | 58.5               | 115.9                       | 115.7 | 114.7              |
| 600     | 136.6                     | 137.3 | 131.9              | 63.0                         | 62.8  | 61.9               | 118.9                       | 118.8 | 117.7              |



|      |       |       |       |      |      |      |       |       |       |
|------|-------|-------|-------|------|------|------|-------|-------|-------|
| 650  | 141.7 | 142.4 | 136.9 | 65.8 | 65.7 | 65.0 | 122.2 | 122.0 | 120.9 |
| 700  | 146.7 | 147.4 | 141.9 | 68.3 | 68.4 | 67.8 | 125.5 | 125.3 | 124.2 |
| 750  | 151.5 | 152.2 | 146.6 | 70.6 | 70.9 | 70.3 | 129.0 | 128.8 | 127.6 |
| 800  | 156.1 | 156.8 | 151.2 | 72.7 | 73.1 | 72.6 | 132.6 | 132.4 | 131.2 |
| 850  | 160.6 | 161.3 | 155.7 | 74.7 | 75.2 | 74.7 | 136.3 | 136.1 | 134.9 |
| 900  | 164.9 | 165.7 | 160.0 | 76.4 | 77.1 | 76.7 | 140.0 | 139.9 | 138.7 |
| 950  | 169.1 | 169.9 | 164.2 | 78.1 | 78.9 | 78.5 | 143.9 | 143.8 | 142.6 |
| 1000 | 173.1 | 174.0 | 168.3 | 79.6 | 80.5 | 80.2 | 147.8 | 147.8 | 146.5 |
| 1100 | 180.8 | 181.8 | 176.1 | 82.3 | 83.4 | 83.2 | 155.9 | 156.0 | 154.7 |
| 1200 | 188.1 | 189.2 | 183.4 | 84.7 | 86.0 | 85.7 | 164.3 | 164.5 | 163.1 |
| 1300 | 195.0 | 196.2 | 190.4 | 86.7 | 88.1 | 87.9 | 172.9 | 173.2 | 171.8 |
| 1400 | 201.4 | 202.8 | 197.0 | 88.4 | 90.0 | 89.9 | 181.6 | 182.1 | 180.7 |
| 1500 | 207.6 | 209.0 | 203.2 | 90.0 | 91.7 | 91.5 | 190.5 | 191.2 | 189.8 |
| 1600 | 213.5 | 215.0 | 209.2 | 91.3 | 93.1 | 93.0 | 199.6 | 200.4 | 199.0 |
| 1700 | 219.0 | 220.7 | 214.9 | 92.5 | 94.4 | 94.3 | 208.8 | 209.8 | 208.4 |
| 1800 | 224.3 | 226.1 | 220.3 | 93.5 | 95.5 | 95.4 | 218.1 | 219.3 | 217.9 |
| 1900 | 229.4 | 231.3 | 225.5 | 94.4 | 96.5 | 96.4 | 227.5 | 228.9 | 227.5 |
| 2000 | 234.3 | 236.3 | 230.4 | 95.3 | 97.4 | 97.3 | 237.0 | 238.6 | 237.2 |

SP2a

|      |       |       |       |      |      |      |       |       |       |
|------|-------|-------|-------|------|------|------|-------|-------|-------|
| 200  | 82.7  | 83.8  | 81.2  | 32.8 | 33.1 | 24.9 | 99.8  | 99.8  | 99.4  |
| 250  | 90.8  | 91.9  | 87.3  | 39.1 | 39.1 | 30.0 | 101.6 | 101.6 | 100.7 |
| 300  | 98.3  | 99.4  | 93.2  | 43.3 | 42.9 | 35.3 | 103.7 | 103.7 | 102.4 |
| 350  | 105.2 | 106.3 | 99.1  | 46.9 | 46.3 | 40.7 | 105.9 | 105.9 | 104.3 |
| 400  | 111.7 | 112.7 | 104.9 | 50.6 | 49.9 | 45.8 | 108.4 | 108.3 | 106.4 |
| 450  | 117.9 | 118.8 | 110.5 | 54.2 | 53.6 | 50.5 | 111.0 | 110.9 | 108.9 |
| 500  | 123.8 | 124.6 | 116.1 | 57.7 | 57.2 | 54.8 | 113.8 | 113.7 | 111.5 |
| 550  | 129.5 | 130.2 | 121.5 | 60.9 | 60.6 | 58.6 | 116.7 | 116.6 | 114.3 |
| 600  | 134.9 | 135.6 | 126.7 | 63.8 | 63.7 | 62.1 | 119.9 | 119.7 | 117.3 |
| 650  | 140.1 | 140.8 | 131.8 | 66.5 | 66.5 | 65.2 | 123.1 | 123.0 | 120.5 |
| 700  | 145.1 | 145.9 | 136.8 | 69.0 | 69.1 | 68.0 | 126.5 | 126.4 | 123.9 |
| 750  | 150.0 | 150.7 | 141.5 | 71.2 | 71.5 | 70.5 | 130.0 | 129.9 | 127.3 |
| 800  | 154.6 | 155.4 | 146.2 | 73.3 | 73.7 | 72.8 | 133.6 | 133.5 | 130.9 |
| 850  | 159.1 | 159.9 | 150.6 | 75.2 | 75.7 | 74.9 | 137.3 | 137.2 | 134.6 |
| 900  | 163.5 | 164.3 | 155.0 | 76.9 | 77.6 | 76.9 | 141.1 | 141.1 | 138.4 |
| 950  | 167.7 | 168.6 | 159.2 | 78.5 | 79.3 | 78.7 | 145.0 | 145.0 | 142.3 |
| 1000 | 171.7 | 172.7 | 163.3 | 80.0 | 80.9 | 80.4 | 149.0 | 149.0 | 146.3 |
| 1100 | 179.5 | 180.5 | 171.1 | 82.7 | 83.8 | 83.3 | 157.1 | 157.3 | 154.4 |
| 1200 | 186.8 | 187.9 | 178.4 | 85.0 | 86.3 | 85.9 | 165.5 | 165.8 | 162.9 |
| 1300 | 193.7 | 194.9 | 185.4 | 87.0 | 88.4 | 88.1 | 174.1 | 174.5 | 171.6 |
| 1400 | 200.2 | 201.5 | 192.0 | 88.8 | 90.3 | 90.0 | 182.9 | 183.4 | 180.5 |
| 1500 | 206.4 | 207.8 | 198.2 | 90.3 | 91.9 | 91.7 | 191.9 | 192.5 | 189.6 |
| 1600 | 212.2 | 213.8 | 204.2 | 91.6 | 93.3 | 93.1 | 201.0 | 201.8 | 198.8 |
| 1700 | 217.8 | 219.5 | 209.9 | 92.8 | 94.6 | 94.4 | 210.2 | 211.2 | 208.2 |
| 1800 | 223.2 | 224.9 | 215.3 | 93.8 | 95.7 | 95.5 | 219.5 | 220.7 | 217.7 |
| 1900 | 228.3 | 230.1 | 220.5 | 94.7 | 96.7 | 96.5 | 228.9 | 230.3 | 227.3 |
| 2000 | 233.1 | 235.1 | 225.5 | 95.5 | 97.5 | 97.4 | 238.5 | 240.0 | 237.0 |

SP2b

|      |       |       |       |      |      |      |       |       |       |
|------|-------|-------|-------|------|------|------|-------|-------|-------|
| 200  | 91.4  | 92.0  | 87.0  | 27.0 | 26.9 | 26.4 | 99.3  | 99.2  | 99.0  |
| 250  | 97.9  | 98.4  | 93.4  | 31.5 | 31.5 | 31.2 | 100.7 | 100.7 | 100.4 |
| 300  | 104.0 | 104.6 | 99.5  | 36.4 | 36.6 | 36.3 | 102.4 | 102.4 | 102.1 |
| 350  | 110.0 | 110.7 | 105.5 | 41.4 | 41.7 | 41.5 | 104.4 | 104.3 | 104.0 |
| 400  | 115.9 | 116.5 | 111.4 | 46.2 | 46.6 | 46.4 | 106.5 | 106.5 | 106.2 |
| 450  | 121.6 | 122.3 | 117.1 | 50.6 | 51.2 | 51.0 | 109.0 | 109.0 | 108.7 |
| 500  | 127.1 | 127.9 | 122.7 | 54.7 | 55.4 | 55.2 | 111.6 | 111.6 | 111.3 |
| 550  | 132.5 | 133.4 | 128.1 | 58.3 | 59.1 | 59.0 | 114.4 | 114.5 | 114.2 |
| 600  | 137.7 | 138.7 | 133.4 | 61.6 | 62.5 | 62.4 | 117.4 | 117.5 | 117.2 |
| 650  | 142.8 | 143.8 | 138.5 | 64.5 | 65.5 | 65.4 | 120.6 | 120.7 | 120.4 |
| 700  | 147.6 | 148.7 | 143.5 | 67.1 | 68.3 | 68.2 | 123.9 | 124.1 | 123.8 |
| 750  | 152.4 | 153.5 | 148.3 | 69.5 | 70.8 | 70.7 | 127.3 | 127.6 | 127.2 |
| 800  | 156.9 | 158.2 | 152.9 | 71.7 | 73.1 | 73.0 | 130.8 | 131.2 | 130.8 |
| 850  | 161.3 | 162.7 | 157.4 | 73.7 | 75.2 | 75.1 | 134.5 | 134.9 | 134.5 |
| 900  | 165.6 | 167.0 | 161.8 | 75.6 | 77.1 | 77.0 | 138.2 | 138.7 | 138.3 |
| 950  | 169.7 | 171.3 | 166.0 | 77.3 | 78.9 | 78.8 | 142.0 | 142.6 | 142.2 |
| 1000 | 173.7 | 175.3 | 170.1 | 78.8 | 80.5 | 80.5 | 145.9 | 146.6 | 146.2 |
| 1100 | 181.4 | 183.2 | 177.9 | 81.7 | 83.5 | 83.4 | 154.0 | 154.8 | 154.4 |
| 1200 | 188.6 | 190.5 | 185.2 | 84.1 | 86.0 | 85.9 | 162.2 | 163.2 | 162.9 |
| 1300 | 195.4 | 197.5 | 192.2 | 86.2 | 88.2 | 88.1 | 170.8 | 172.0 | 171.6 |
| 1400 | 201.9 | 204.1 | 198.8 | 88.0 | 90.1 | 90.0 | 179.5 | 180.9 | 180.5 |
| 1500 | 208.0 | 210.4 | 205.1 | 89.6 | 91.7 | 91.7 | 188.3 | 190.0 | 189.6 |
| 1600 | 213.8 | 216.3 | 211.0 | 90.9 | 93.2 | 93.1 | 197.4 | 199.2 | 198.8 |
| 1700 | 219.4 | 222.0 | 216.7 | 92.1 | 94.4 | 94.4 | 206.5 | 208.6 | 208.2 |
| 1800 | 224.7 | 227.5 | 222.2 | 93.2 | 95.6 | 95.5 | 215.8 | 218.1 | 217.7 |
| 1900 | 229.7 | 232.7 | 227.4 | 94.2 | 96.5 | 96.5 | 225.2 | 227.7 | 227.3 |
| 2000 | 234.6 | 237.6 | 232.3 | 95.0 | 97.4 | 97.4 | 234.6 | 237.4 | 237.0 |

SP3a

|      |       |       |       |      |      |      |       |       |       |
|------|-------|-------|-------|------|------|------|-------|-------|-------|
| 200  | 81.6  | 82.3  | 81.2  | 28.7 | 28.0 | 24.9 | 99.5  | 99.5  | 99.3  |
| 250  | 88.8  | 89.3  | 87.3  | 36.2 | 35.3 | 29.9 | 101.2 | 101.1 | 100.7 |
| 300  | 96.0  | 96.4  | 93.2  | 43.4 | 43.0 | 35.2 | 103.2 | 103.0 | 102.3 |
| 350  | 103.2 | 103.6 | 99.1  | 49.5 | 50.3 | 40.6 | 105.5 | 105.4 | 104.2 |
| 400  | 110.1 | 110.8 | 104.8 | 54.3 | 56.3 | 45.7 | 108.1 | 108.1 | 106.4 |
| 450  | 116.7 | 117.7 | 110.5 | 58.1 | 60.8 | 50.4 | 110.9 | 111.0 | 108.8 |
| 500  | 123.0 | 124.2 | 116.0 | 61.2 | 64.0 | 54.7 | 113.9 | 114.1 | 111.4 |
| 550  | 129.0 | 130.5 | 121.4 | 63.8 | 66.5 | 58.5 | 117.0 | 117.4 | 114.3 |
| 600  | 134.6 | 136.3 | 126.7 | 66.1 | 68.6 | 62.0 | 120.3 | 120.8 | 117.3 |
| 650  | 140.0 | 141.9 | 131.8 | 68.2 | 70.5 | 65.1 | 123.6 | 124.2 | 120.5 |
| 700  | 145.1 | 147.2 | 136.7 | 70.2 | 72.4 | 67.9 | 127.1 | 127.8 | 123.8 |
| 750  | 150.1 | 152.3 | 141.5 | 72.1 | 74.1 | 70.5 | 130.6 | 131.5 | 127.2 |
| 800  | 154.8 | 157.1 | 146.1 | 73.9 | 75.8 | 72.8 | 134.3 | 135.2 | 130.8 |
| 850  | 159.3 | 161.8 | 150.6 | 75.6 | 77.5 | 74.9 | 138.0 | 139.0 | 134.5 |
| 900  | 163.7 | 166.2 | 154.9 | 77.1 | 79.0 | 76.9 | 141.8 | 143.0 | 138.3 |
| 950  | 167.9 | 170.5 | 159.1 | 78.6 | 80.5 | 78.7 | 145.7 | 147.0 | 142.2 |
| 1000 | 171.9 | 174.7 | 163.2 | 80.0 | 81.9 | 80.3 | 149.7 | 151.0 | 146.2 |
| 1100 | 179.7 | 182.6 | 171.0 | 82.5 | 84.5 | 83.3 | 157.8 | 159.3 | 154.4 |
| 1200 | 187.0 | 190.1 | 178.3 | 84.7 | 86.8 | 85.9 | 166.2 | 167.9 | 162.8 |

|      |       |       |       |      |      |      |       |       |       |
|------|-------|-------|-------|------|------|------|-------|-------|-------|
| 1300 | 193.8 | 197.1 | 185.3 | 86.7 | 88.8 | 88.1 | 174.8 | 176.7 | 171.5 |
| 1400 | 200.3 | 203.8 | 191.9 | 88.4 | 90.6 | 90.0 | 183.5 | 185.7 | 180.4 |
| 1500 | 206.5 | 210.1 | 198.2 | 89.9 | 92.1 | 91.7 | 192.4 | 194.8 | 189.5 |
| 1600 | 212.3 | 216.1 | 204.1 | 91.2 | 93.5 | 93.1 | 201.5 | 204.1 | 198.8 |
| 1700 | 217.9 | 221.8 | 209.8 | 92.4 | 94.7 | 94.4 | 210.7 | 213.5 | 208.1 |
| 1800 | 223.2 | 227.2 | 215.3 | 93.4 | 95.8 | 95.5 | 220.0 | 223.0 | 217.6 |
| 1900 | 228.3 | 232.4 | 220.5 | 94.4 | 96.8 | 96.5 | 229.4 | 232.6 | 227.2 |
| 2000 | 233.1 | 237.4 | 225.4 | 95.2 | 97.6 | 97.4 | 238.8 | 242.4 | 236.9 |

SP3b

|      |       |       |       |      |      |      |       |       |       |
|------|-------|-------|-------|------|------|------|-------|-------|-------|
| 200  | 90.7  | 91.2  | 85.8  | 27.7 | 27.1 | 26.4 | 99.2  | 99.2  | 99.0  |
| 250  | 97.3  | 97.7  | 92.2  | 32.2 | 31.7 | 31.2 | 100.7 | 100.7 | 100.4 |
| 300  | 103.6 | 104.0 | 98.4  | 37.0 | 36.6 | 36.3 | 102.5 | 102.4 | 102.1 |
| 350  | 109.7 | 110.0 | 104.3 | 42.0 | 41.7 | 41.4 | 104.4 | 104.3 | 104.0 |
| 400  | 115.6 | 115.9 | 110.2 | 46.7 | 46.6 | 46.4 | 106.7 | 106.5 | 106.2 |
| 450  | 121.4 | 121.6 | 115.9 | 51.1 | 51.2 | 51.0 | 109.1 | 109.0 | 108.7 |
| 500  | 127.0 | 127.2 | 121.5 | 55.1 | 55.3 | 55.2 | 111.8 | 111.6 | 111.3 |
| 550  | 132.4 | 132.7 | 127.0 | 58.7 | 59.1 | 58.9 | 114.6 | 114.5 | 114.2 |
| 600  | 137.7 | 138.0 | 132.2 | 62.0 | 62.4 | 62.3 | 117.6 | 117.5 | 117.2 |
| 650  | 142.7 | 143.1 | 137.4 | 64.9 | 65.5 | 65.4 | 120.8 | 120.7 | 120.4 |
| 700  | 147.7 | 148.0 | 142.3 | 67.5 | 68.2 | 68.2 | 124.1 | 124.1 | 123.8 |
| 750  | 152.4 | 152.8 | 147.1 | 69.9 | 70.8 | 70.7 | 127.5 | 127.6 | 127.2 |
| 800  | 157.0 | 157.5 | 151.7 | 72.0 | 73.0 | 73.0 | 131.1 | 131.2 | 130.8 |
| 850  | 161.4 | 162.0 | 156.2 | 74.0 | 75.1 | 75.1 | 134.7 | 134.9 | 134.5 |
| 900  | 165.7 | 166.3 | 160.6 | 75.8 | 77.1 | 77.0 | 138.5 | 138.7 | 138.3 |
| 950  | 169.8 | 170.5 | 164.8 | 77.5 | 78.9 | 78.8 | 142.3 | 142.6 | 142.2 |
| 1000 | 173.8 | 174.6 | 168.9 | 79.1 | 80.5 | 80.5 | 146.2 | 146.5 | 146.2 |
| 1100 | 181.5 | 182.4 | 176.7 | 81.8 | 83.4 | 83.4 | 154.3 | 154.8 | 154.4 |
| 1200 | 188.7 | 189.8 | 184.1 | 84.2 | 86.0 | 85.9 | 162.6 | 163.2 | 162.9 |
| 1300 | 195.6 | 196.8 | 191.0 | 86.3 | 88.2 | 88.1 | 171.1 | 171.9 | 171.6 |
| 1400 | 202.0 | 203.4 | 197.6 | 88.1 | 90.1 | 90.0 | 179.8 | 180.8 | 180.5 |
| 1500 | 208.1 | 209.7 | 203.9 | 89.6 | 91.7 | 91.7 | 188.7 | 189.9 | 189.6 |
| 1600 | 214.0 | 215.6 | 209.9 | 91.0 | 93.2 | 93.1 | 197.8 | 199.2 | 198.8 |
| 1700 | 219.5 | 221.3 | 215.5 | 92.2 | 94.4 | 94.4 | 206.9 | 208.6 | 208.2 |
| 1800 | 224.8 | 226.7 | 221.0 | 93.2 | 95.6 | 95.5 | 216.2 | 218.1 | 217.7 |
| 1900 | 229.9 | 231.9 | 226.2 | 94.2 | 96.5 | 96.5 | 225.6 | 227.7 | 227.3 |
| 2000 | 234.7 | 236.9 | 231.1 | 95.0 | 97.4 | 97.4 | 235.0 | 237.4 | 237.0 |

SP4

|     |       |       |       |      |      |      |       |       |       |
|-----|-------|-------|-------|------|------|------|-------|-------|-------|
| 200 | 91.2  | 91.9  | 89.2  | 27.8 | 27.3 | 25.6 | 99.2  | 99.2  | 98.9  |
| 250 | 97.8  | 98.4  | 95.4  | 32.0 | 31.5 | 30.2 | 100.7 | 100.6 | 100.3 |
| 300 | 104.1 | 104.5 | 101.4 | 36.8 | 36.2 | 35.3 | 102.4 | 102.3 | 101.9 |
| 350 | 110.1 | 110.5 | 107.2 | 41.7 | 41.1 | 40.5 | 104.4 | 104.2 | 103.8 |
| 400 | 116.0 | 116.3 | 112.9 | 46.5 | 46.0 | 45.5 | 106.6 | 106.4 | 105.9 |
| 450 | 121.8 | 122.0 | 118.6 | 51.0 | 50.5 | 50.2 | 109.0 | 108.8 | 108.3 |
| 500 | 127.4 | 127.5 | 124.1 | 55.1 | 54.7 | 54.4 | 111.7 | 111.5 | 111.0 |
| 550 | 132.8 | 132.9 | 129.4 | 58.8 | 58.5 | 58.3 | 114.5 | 114.3 | 113.8 |
| 600 | 138.0 | 138.2 | 134.7 | 62.1 | 61.9 | 61.7 | 117.5 | 117.3 | 116.8 |
| 650 | 143.1 | 143.2 | 139.7 | 65.1 | 65.0 | 64.9 | 120.7 | 120.5 | 119.9 |

|      |       |       |       |      |      |      |       |       |       |
|------|-------|-------|-------|------|------|------|-------|-------|-------|
| 700  | 148.1 | 148.2 | 144.6 | 67.7 | 67.8 | 67.7 | 124.0 | 123.8 | 123.3 |
| 750  | 152.8 | 152.9 | 149.4 | 70.1 | 70.4 | 70.3 | 127.5 | 127.3 | 126.7 |
| 800  | 157.4 | 157.6 | 154.0 | 72.4 | 72.8 | 72.7 | 131.1 | 130.8 | 130.3 |
| 850  | 161.9 | 162.0 | 158.5 | 74.4 | 74.9 | 74.8 | 134.7 | 134.5 | 134.0 |
| 900  | 166.2 | 166.4 | 162.8 | 76.2 | 76.9 | 76.8 | 138.5 | 138.3 | 137.8 |
| 950  | 170.3 | 170.6 | 167.0 | 77.9 | 78.7 | 78.7 | 142.3 | 142.2 | 141.6 |
| 1000 | 174.4 | 174.7 | 171.1 | 79.5 | 80.4 | 80.3 | 146.3 | 146.2 | 145.6 |
| 1100 | 182.1 | 182.5 | 178.9 | 82.3 | 83.4 | 83.4 | 154.4 | 154.4 | 153.8 |
| 1200 | 189.3 | 189.8 | 186.3 | 84.7 | 86.0 | 86.0 | 162.7 | 162.9 | 162.3 |
| 1300 | 196.2 | 196.8 | 193.2 | 86.7 | 88.2 | 88.2 | 171.3 | 171.6 | 171.0 |
| 1400 | 202.7 | 203.4 | 199.8 | 88.5 | 90.2 | 90.1 | 180.1 | 180.5 | 179.9 |
| 1500 | 208.9 | 209.7 | 206.1 | 90.1 | 91.8 | 91.8 | 189.0 | 189.6 | 189.0 |
| 1600 | 214.7 | 215.7 | 212.1 | 91.4 | 93.3 | 93.3 | 198.1 | 198.9 | 198.3 |
| 1700 | 220.3 | 221.4 | 217.8 | 92.6 | 94.6 | 94.5 | 207.3 | 208.3 | 207.7 |
| 1800 | 225.6 | 226.8 | 223.2 | 93.6 | 95.7 | 95.7 | 216.6 | 217.8 | 217.2 |
| 1900 | 230.7 | 232.0 | 228.4 | 94.5 | 96.7 | 96.7 | 226.0 | 227.4 | 226.8 |
| 2000 | 235.6 | 237.0 | 233.4 | 95.4 | 97.6 | 97.5 | 235.5 | 237.1 | 236.5 |

SP<sub>cpt</sub>

|      |       |       |       |      |      |      |       |       |       |
|------|-------|-------|-------|------|------|------|-------|-------|-------|
| 200  | 84.6  | 85.5  | 83.3  | 23.4 | 23.1 | 22.8 | 95.9  | 95.9  | 95.8  |
| 250  | 90.3  | 91.0  | 88.9  | 27.7 | 27.2 | 27.1 | 97.2  | 97.1  | 97.0  |
| 300  | 95.8  | 96.4  | 94.2  | 32.5 | 32.0 | 31.9 | 98.7  | 98.6  | 98.5  |
| 350  | 101.1 | 101.7 | 99.5  | 37.3 | 36.9 | 36.8 | 100.4 | 100.3 | 100.2 |
| 400  | 106.4 | 107.0 | 104.8 | 42.0 | 41.6 | 41.6 | 102.4 | 102.3 | 102.2 |
| 450  | 111.6 | 112.1 | 109.9 | 46.4 | 46.0 | 46.0 | 104.6 | 104.5 | 104.3 |
| 500  | 116.7 | 117.2 | 115.0 | 50.4 | 50.1 | 50.1 | 107.0 | 106.9 | 106.7 |
| 550  | 121.7 | 122.1 | 119.9 | 54.0 | 53.8 | 53.7 | 109.6 | 109.5 | 109.3 |
| 600  | 126.5 | 127.0 | 124.7 | 57.2 | 57.1 | 57.1 | 112.4 | 112.3 | 112.1 |
| 650  | 131.2 | 131.6 | 129.4 | 60.1 | 60.1 | 60.1 | 115.4 | 115.2 | 115.0 |
| 700  | 135.8 | 136.2 | 134.0 | 62.7 | 62.8 | 62.8 | 118.4 | 118.3 | 118.1 |
| 750  | 140.2 | 140.6 | 138.4 | 65.1 | 65.3 | 65.3 | 121.6 | 121.5 | 121.3 |
| 800  | 144.5 | 144.9 | 142.7 | 67.3 | 67.6 | 67.6 | 124.9 | 124.8 | 124.6 |
| 850  | 148.6 | 149.1 | 146.8 | 69.3 | 69.7 | 69.7 | 128.4 | 128.2 | 128.1 |
| 900  | 152.6 | 153.1 | 150.9 | 71.1 | 71.6 | 71.6 | 131.9 | 131.8 | 131.6 |
| 950  | 156.5 | 157.0 | 154.8 | 72.8 | 73.4 | 73.4 | 135.5 | 135.4 | 135.2 |
| 1000 | 160.3 | 160.8 | 158.6 | 74.4 | 75.0 | 75.0 | 139.1 | 139.1 | 138.9 |
| 1100 | 167.5 | 168.1 | 165.9 | 77.2 | 77.9 | 77.9 | 146.7 | 146.7 | 146.6 |
| 1200 | 174.3 | 175.0 | 172.8 | 79.6 | 80.5 | 80.4 | 154.6 | 154.7 | 154.5 |
| 1300 | 180.8 | 181.5 | 179.3 | 81.6 | 82.6 | 82.6 | 162.6 | 162.8 | 162.7 |
| 1400 | 186.9 | 187.7 | 185.5 | 83.4 | 84.5 | 84.5 | 170.9 | 171.2 | 171.0 |
| 1500 | 192.7 | 193.6 | 191.4 | 85.0 | 86.2 | 86.1 | 179.3 | 179.7 | 179.6 |
| 1600 | 198.2 | 199.2 | 197.0 | 86.3 | 87.6 | 87.6 | 187.9 | 188.4 | 188.3 |
| 1700 | 203.5 | 204.6 | 202.4 | 87.5 | 88.8 | 88.8 | 196.6 | 197.2 | 197.1 |
| 1800 | 208.5 | 209.7 | 207.5 | 88.5 | 89.9 | 89.9 | 205.4 | 206.2 | 206.0 |
| 1900 | 213.3 | 214.6 | 212.4 | 89.5 | 90.9 | 90.9 | 214.3 | 215.2 | 215.1 |
| 2000 | 217.9 | 219.3 | 217.0 | 90.3 | 91.8 | 91.8 | 223.2 | 224.3 | 224.2 |

<sup>a</sup> The zero of energy is set equal to the potential energy of the global minimum.

<sup>b</sup> Calculated using the lowest-energy conformer.

## 6. Location of generalized transition state at different temperatures

Table S9 Location of generalized transition state along different temperatures.

| T (K) | R1      | R2a    | R2b    | R3a    | R3b     | R4     | <i>Rcpt</i> |
|-------|---------|--------|--------|--------|---------|--------|-------------|
| 200   | -0.1676 | 0.0189 | 0.0055 | 0.0141 | -0.0036 | 0.011  | -0.0195     |
| 250   | -0.1669 | 0.0195 | 0.0052 | 0.0136 | -0.0036 | 0.0104 | -0.02       |
| 300   | -0.1664 | 0.0204 | 0.0051 | 0.0131 | -0.0036 | 0.01   | -0.0206     |
| 350   | -0.166  | 0.0213 | 0.0049 | 0.0128 | -0.0036 | 0.0095 | -0.0213     |
| 400   | -0.1658 | 0.0224 | 0.0048 | 0.0126 | -0.0035 | 0.0091 | -0.022      |
| 450   | -0.1656 | 0.0237 | 0.0047 | 0.0124 | -0.0035 | 0.0087 | -0.0231     |
| 500   | -0.1656 | 0.0252 | 0.0046 | 0.0124 | -0.0035 | 0.0083 | -0.0246     |
| 550   | -0.1655 | 0.0268 | 0.0045 | 0.0124 | -0.0034 | 0.008  | -0.0261     |
| 600   | -0.1656 | 0.0284 | 0.0045 | 0.0124 | -0.0034 | 0.0078 | -0.0277     |
| 650   | -0.1656 | 0.03   | 0.0044 | 0.0125 | -0.0034 | 0.0075 | -0.0294     |
| 700   | -0.1657 | 0.0317 | 0.0044 | 0.0126 | -0.0033 | 0.0073 | -0.0311     |
| 750   | -0.1658 | 0.0334 | 0.0043 | 0.0127 | -0.0033 | 0.007  | -0.0328     |
| 800   | -0.1659 | 0.0351 | 0.0043 | 0.0128 | -0.0033 | 0.0068 | -0.0346     |
| 850   | -0.166  | 0.0369 | 0.0042 | 0.013  | -0.0032 | 0.0067 | -0.0363     |
| 900   | -0.1661 | 0.0386 | 0.0042 | 0.0131 | -0.0032 | 0.0065 | -0.0381     |
| 950   | -0.1662 | 0.0404 | 0.0041 | 0.0133 | -0.0032 | 0.0063 | -0.0399     |
| 1000  | -0.1664 | 0.0421 | 0.0041 | 0.0134 | -0.0031 | 0.0062 | -0.0417     |
| 1100  | -0.1666 | 0.0456 | 0.004  | 0.0138 | -0.0031 | 0.0059 | -0.1714     |
| 1200  | -0.1668 | 0.0491 | 0.004  | 0.0141 | -0.003  | 0.0057 | -0.1728     |
| 1300  | -0.167  | 0.0525 | 0.0039 | 0.0145 | -0.003  | 0.0054 | -0.1739     |
| 1400  | -0.1672 | 0.056  | 0.0039 | 0.0148 | -0.003  | 0.0052 | -0.175      |
| 1500  | -0.1674 | 0.0593 | 0.0038 | 0.0151 | -0.0029 | 0.005  | -0.1759     |
| 1600  | -0.1676 | 0.2174 | 0.0038 | 0.0155 | -0.0029 | 0.0049 | -0.1767     |
| 1700  | -0.1678 | 0.2184 | 0.0037 | 0.0158 | -0.0028 | 0.0047 | -0.1775     |
| 1800  | -0.1679 | 0.2193 | 0.0037 | 0.0161 | -0.0028 | 0.0046 | -0.1781     |
| 1900  | -0.1681 | 0.2201 | 0.0037 | 0.0164 | -0.0028 | 0.0044 | -0.1787     |

|      |         |        |        |        |         |        |         |
|------|---------|--------|--------|--------|---------|--------|---------|
| 2000 | -0.1682 | 0.2208 | 0.0036 | 0.0166 | -0.0027 | 0.0043 | -0.1793 |
|------|---------|--------|--------|--------|---------|--------|---------|

---

## 7. Transmission coefficients

Table S10 Canonical recrossing coefficients at different temperatures.

| T (K) | R1    | R2a   | R2b   | R3a   | R3b   | R4    | <i>Rcpt</i> |
|-------|-------|-------|-------|-------|-------|-------|-------------|
| 200   | 0.203 | 0.848 | 0.739 | 0.875 | 0.815 | 0.990 | 0.873       |
| 250   | 0.244 | 0.868 | 0.758 | 0.897 | 0.817 | 0.993 | 0.890       |
| 300   | 0.272 | 0.880 | 0.772 | 0.911 | 0.820 | 0.996 | 0.899       |
| 350   | 0.290 | 0.887 | 0.782 | 0.921 | 0.823 | 0.997 | 0.905       |
| 400   | 0.301 | 0.890 | 0.791 | 0.927 | 0.827 | 0.998 | 0.909       |
| 450   | 0.307 | 0.898 | 0.798 | 0.932 | 0.831 | 0.998 | 0.916       |
| 500   | 0.309 | 0.897 | 0.805 | 0.935 | 0.834 | 0.999 | 0.916       |
| 550   | 0.310 | 0.896 | 0.810 | 0.937 | 0.838 | 0.999 | 0.916       |
| 600   | 0.308 | 0.894 | 0.815 | 0.938 | 0.841 | 0.999 | 0.915       |
| 650   | 0.306 | 0.891 | 0.819 | 0.939 | 0.844 | 1.000 | 0.913       |
| 700   | 0.303 | 0.888 | 0.823 | 0.940 | 0.847 | 1.000 | 0.912       |
| 750   | 0.300 | 0.884 | 0.826 | 0.940 | 0.850 | 1.000 | 0.910       |
| 800   | 0.296 | 0.880 | 0.830 | 0.941 | 0.853 | 1.000 | 0.908       |
| 850   | 0.293 | 0.876 | 0.833 | 0.941 | 0.855 | 1.000 | 0.905       |
| 900   | 0.289 | 0.872 | 0.835 | 0.941 | 0.858 | 1.000 | 0.903       |
| 950   | 0.286 | 0.868 | 0.838 | 0.940 | 0.860 | 1.000 | 0.901       |
| 1000  | 0.282 | 0.864 | 0.840 | 0.940 | 0.862 | 1.000 | 0.898       |
| 1100  | 0.275 | 0.855 | 0.845 | 0.940 | 0.866 | 1.000 | 0.837       |
| 1200  | 0.269 | 0.846 | 0.849 | 0.939 | 0.870 | 1.000 | 0.770       |
| 1300  | 0.263 | 0.837 | 0.852 | 0.938 | 0.873 | 1.000 | 0.715       |
| 1400  | 0.258 | 0.828 | 0.856 | 0.937 | 0.876 | 1.000 | 0.670       |
| 1500  | 0.254 | 0.819 | 0.859 | 0.937 | 0.879 | 1.000 | 0.632       |
| 1600  | 0.249 | 0.749 | 0.861 | 0.936 | 0.882 | 1.000 | 0.601       |
| 1700  | 0.245 | 0.684 | 0.864 | 0.935 | 0.884 | 1.000 | 0.573       |
| 1800  | 0.242 | 0.631 | 0.866 | 0.935 | 0.887 | 1.000 | 0.549       |
| 1900  | 0.239 | 0.586 | 0.869 | 0.934 | 0.889 | 1.000 | 0.529       |

|      |       |       |       |       |       |       |       |
|------|-------|-------|-------|-------|-------|-------|-------|
| 2000 | 0.236 | 0.548 | 0.871 | 0.933 | 0.891 | 1.000 | 0.511 |
|------|-------|-------|-------|-------|-------|-------|-------|

Table S11 Tunneling transmission coefficients calculated using the multi-dimensional small-curvature tunneling (SCT) approximation and zero-curvature tunneling (ZCT) approximation, as well as one-dimensional Eckart tunneling (ET) approximation.

| T (K)      | R1    | R2a     | R2b    | R3a    | R3b    | R4   | <i>Rc<sub>pt</sub></i> |
|------------|-------|---------|--------|--------|--------|------|------------------------|
| <b>SCT</b> |       |         |        |        |        |      |                        |
| 200        | 24.98 | 1127.30 | 477.35 | 195.18 | 575.05 | 6.70 | 631.13                 |
| 250        | 7.55  | 140.26  | 62.30  | 46.56  | 66.90  | 3.73 | 70.94                  |
| 300        | 4.05  | 38.72   | 19.47  | 18.58  | 19.80  | 2.62 | 20.49                  |
| 350        | 2.80  | 16.55   | 9.38   | 9.92   | 9.29   | 2.08 | 9.49                   |
| 400        | 2.20  | 9.18    | 5.74   | 6.34   | 5.62   | 1.77 | 5.70                   |
| 450        | 1.87  | 6.00    | 4.06   | 4.56   | 3.95   | 1.58 | 4.00                   |
| 500        | 1.66  | 4.38    | 3.15   | 3.54   | 3.06   | 1.46 | 3.09                   |
| 550        | 1.52  | 3.45    | 2.60   | 2.92   | 2.52   | 1.37 | 2.55                   |
| 600        | 1.43  | 2.86    | 2.24   | 2.50   | 2.18   | 1.31 | 2.21                   |
| 650        | 1.35  | 2.46    | 2.00   | 2.21   | 1.94   | 1.26 | 1.97                   |
| 700        | 1.30  | 2.19    | 1.82   | 2.00   | 1.77   | 1.22 | 1.79                   |
| 750        | 1.26  | 1.99    | 1.69   | 1.84   | 1.64   | 1.19 | 1.67                   |
| 800        | 1.22  | 1.83    | 1.58   | 1.72   | 1.54   | 1.16 | 1.57                   |
| 850        | 1.19  | 1.71    | 1.50   | 1.62   | 1.47   | 1.14 | 1.49                   |
| 900        | 1.17  | 1.62    | 1.44   | 1.54   | 1.41   | 1.13 | 1.43                   |
| 950        | 1.15  | 1.54    | 1.39   | 1.48   | 1.36   | 1.11 | 1.38                   |
| 1000       | 1.14  | 1.48    | 1.34   | 1.43   | 1.31   | 1.10 | 1.33                   |
| 1100       | 1.11  | 1.38    | 1.28   | 1.34   | 1.25   | 1.08 | 1.27                   |
| 1200       | 1.09  | 1.32    | 1.23   | 1.28   | 1.20   | 1.07 | 1.22                   |
| 1300       | 1.08  | 1.26    | 1.19   | 1.24   | 1.17   | 1.06 | 1.19                   |
| 1400       | 1.07  | 1.22    | 1.16   | 1.20   | 1.14   | 1.05 | 1.16                   |
| 1500       | 1.06  | 1.19    | 1.14   | 1.17   | 1.12   | 1.04 | 1.14                   |



|      |      |      |      |      |      |      |      |
|------|------|------|------|------|------|------|------|
| 1600 | 1.05 | 1.17 | 1.12 | 1.15 | 1.11 | 1.04 | 1.12 |
| 1700 | 1.05 | 1.15 | 1.11 | 1.13 | 1.09 | 1.03 | 1.11 |
| 1800 | 1.04 | 1.13 | 1.09 | 1.12 | 1.08 | 1.03 | 1.09 |
| 1900 | 1.04 | 1.12 | 1.08 | 1.11 | 1.07 | 1.03 | 1.08 |
| 2000 | 1.03 | 1.10 | 1.07 | 1.10 | 1.06 | 1.02 | 1.08 |

# **ZCT**

|      |      |        |       |       |       |      |       |
|------|------|--------|-------|-------|-------|------|-------|
| 200  | 4.26 | 139.29 | 51.10 | 89.25 | 37.10 | 4.03 | 39.63 |
| 250  | 2.45 | 28.13  | 14.30 | 24.03 | 10.09 | 2.52 | 10.48 |
| 300  | 1.85 | 11.17  | 6.85  | 10.61 | 4.98  | 1.92 | 5.13  |
| 350  | 1.57 | 6.22   | 4.29  | 6.17  | 3.25  | 1.62 | 3.34  |
| 400  | 1.41 | 4.18   | 3.12  | 4.22  | 2.46  | 1.45 | 2.53  |
| 450  | 1.31 | 3.16   | 2.49  | 3.21  | 2.03  | 1.34 | 2.09  |
| 500  | 1.25 | 2.57   | 2.11  | 2.62  | 1.76  | 1.27 | 1.82  |
| 550  | 1.20 | 2.20   | 1.86  | 2.24  | 1.59  | 1.22 | 1.64  |
| 600  | 1.16 | 1.95   | 1.69  | 1.99  | 1.47  | 1.18 | 1.52  |
| 650  | 1.14 | 1.77   | 1.57  | 1.81  | 1.39  | 1.15 | 1.43  |
| 700  | 1.12 | 1.64   | 1.48  | 1.67  | 1.32  | 1.13 | 1.36  |
| 750  | 1.10 | 1.54   | 1.40  | 1.57  | 1.27  | 1.11 | 1.31  |
| 800  | 1.09 | 1.47   | 1.35  | 1.49  | 1.23  | 1.10 | 1.27  |
| 850  | 1.08 | 1.41   | 1.30  | 1.42  | 1.20  | 1.09 | 1.23  |
| 900  | 1.07 | 1.36   | 1.27  | 1.37  | 1.17  | 1.08 | 1.20  |
| 950  | 1.06 | 1.32   | 1.24  | 1.33  | 1.15  | 1.07 | 1.18  |
| 1000 | 1.06 | 1.28   | 1.21  | 1.29  | 1.14  | 1.06 | 1.16  |
| 1100 | 1.05 | 1.23   | 1.17  | 1.24  | 1.11  | 1.05 | 1.13  |
| 1200 | 1.04 | 1.19   | 1.14  | 1.20  | 1.09  | 1.04 | 1.11  |
| 1300 | 1.03 | 1.16   | 1.12  | 1.17  | 1.07  | 1.03 | 1.09  |
| 1400 | 1.03 | 1.14   | 1.10  | 1.14  | 1.06  | 1.03 | 1.08  |
| 1500 | 1.02 | 1.12   | 1.09  | 1.12  | 1.05  | 1.03 | 1.07  |
| 1600 | 1.02 | 1.10   | 1.08  | 1.11  | 1.04  | 1.02 | 1.06  |

|      |      |      |      |      |      |      |      |
|------|------|------|------|------|------|------|------|
| 1700 | 1.02 | 1.09 | 1.07 | 1.09 | 1.04 | 1.02 | 1.05 |
| 1800 | 1.02 | 1.08 | 1.06 | 1.08 | 1.03 | 1.02 | 1.05 |
| 1900 | 1.02 | 1.07 | 1.05 | 1.07 | 1.03 | 1.01 | 1.04 |
| 2000 | 1.01 | 1.06 | 1.05 | 1.07 | 1.02 | 1.01 | 1.04 |

# **ET**

|      |       |        |         |       |         |      |         |
|------|-------|--------|---------|-------|---------|------|---------|
| 200  | 88.73 | 488.44 | 1174.33 | 60.46 | 1255.86 | 7.54 | 1093.44 |
| 250  | 17.91 | 70.38  | 105.42  | 17.67 | 102.91  | 4.22 | 93.99   |
| 300  | 7.29  | 21.39  | 25.48   | 8.48  | 24.46   | 3.01 | 23.08   |
| 350  | 4.23  | 9.99   | 10.61   | 5.21  | 10.06   | 2.39 | 9.66    |
| 400  | 2.99  | 5.97   | 5.99    | 3.70  | 5.71    | 2.03 | 5.53    |
| 450  | 2.36  | 4.15   | 4.06    | 2.89  | 3.88    | 1.80 | 3.80    |
| 500  | 1.99  | 3.19   | 3.08    | 2.41  | 2.96    | 1.65 | 2.91    |
| 550  | 1.76  | 2.62   | 2.51    | 2.10  | 2.43    | 1.57 | 2.40    |
| 600  | 1.60  | 2.25   | 2.16    | 1.89  | 2.10    | 1.46 | 2.07    |
| 650  | 1.49  | 2.00   | 1.92    | 1.76  | 1.87    | 1.43 | 1.85    |
| 700  | 1.41  | 1.82   | 1.75    | 1.63  | 1.71    | 1.35 | 1.69    |
| 750  | 1.34  | 1.68   | 1.62    | 1.53  | 1.59    | 1.31 | 1.58    |
| 800  | 1.30  | 1.58   | 1.53    | 1.46  | 1.50    | 1.29 | 1.49    |
| 850  | 1.26  | 1.50   | 1.45    | 1.40  | 1.43    | 1.25 | 1.42    |
| 900  | 1.22  | 1.43   | 1.39    | 1.36  | 1.37    | 1.23 | 1.37    |
| 950  | 1.20  | 1.38   | 1.34    | 1.32  | 1.33    | 1.22 | 1.32    |
| 1000 | 1.18  | 1.34   | 1.30    | 1.29  | 1.29    | 1.20 | 1.28    |
| 1100 | 1.14  | 1.27   | 1.24    | 1.24  | 1.23    | 1.17 | 1.23    |
| 1200 | 1.12  | 1.22   | 1.20    | 1.20  | 1.19    | 1.14 | 1.18    |
| 1300 | 1.10  | 1.19   | 1.16    | 1.18  | 1.16    | 1.15 | 1.15    |
| 1400 | 1.08  | 1.16   | 1.14    | 1.15  | 1.13    | 1.11 | 1.13    |
| 1500 | 1.07  | 1.13   | 1.12    | 1.13  | 1.11    | 1.11 | 1.11    |
| 1600 | 1.06  | 1.12   | 1.10    | 1.11  | 1.10    | 1.11 | 1.10    |
| 1700 | 1.05  | 1.10   | 1.09    | 1.10  | 1.08    | 1.09 | 1.08    |

|      |      |      |      |      |      |      |      |
|------|------|------|------|------|------|------|------|
| 1800 | 1.05 | 1.09 | 1.08 | 1.09 | 1.07 | 1.08 | 1.07 |
| 1900 | 1.04 | 1.08 | 1.07 | 1.08 | 1.07 | 1.07 | 1.06 |
| 2000 | 1.04 | 1.07 | 1.06 | 1.07 | 1.06 | 1.07 | 1.06 |

---

## 8. Changes of vibrational frequencies along the reaction coordinate

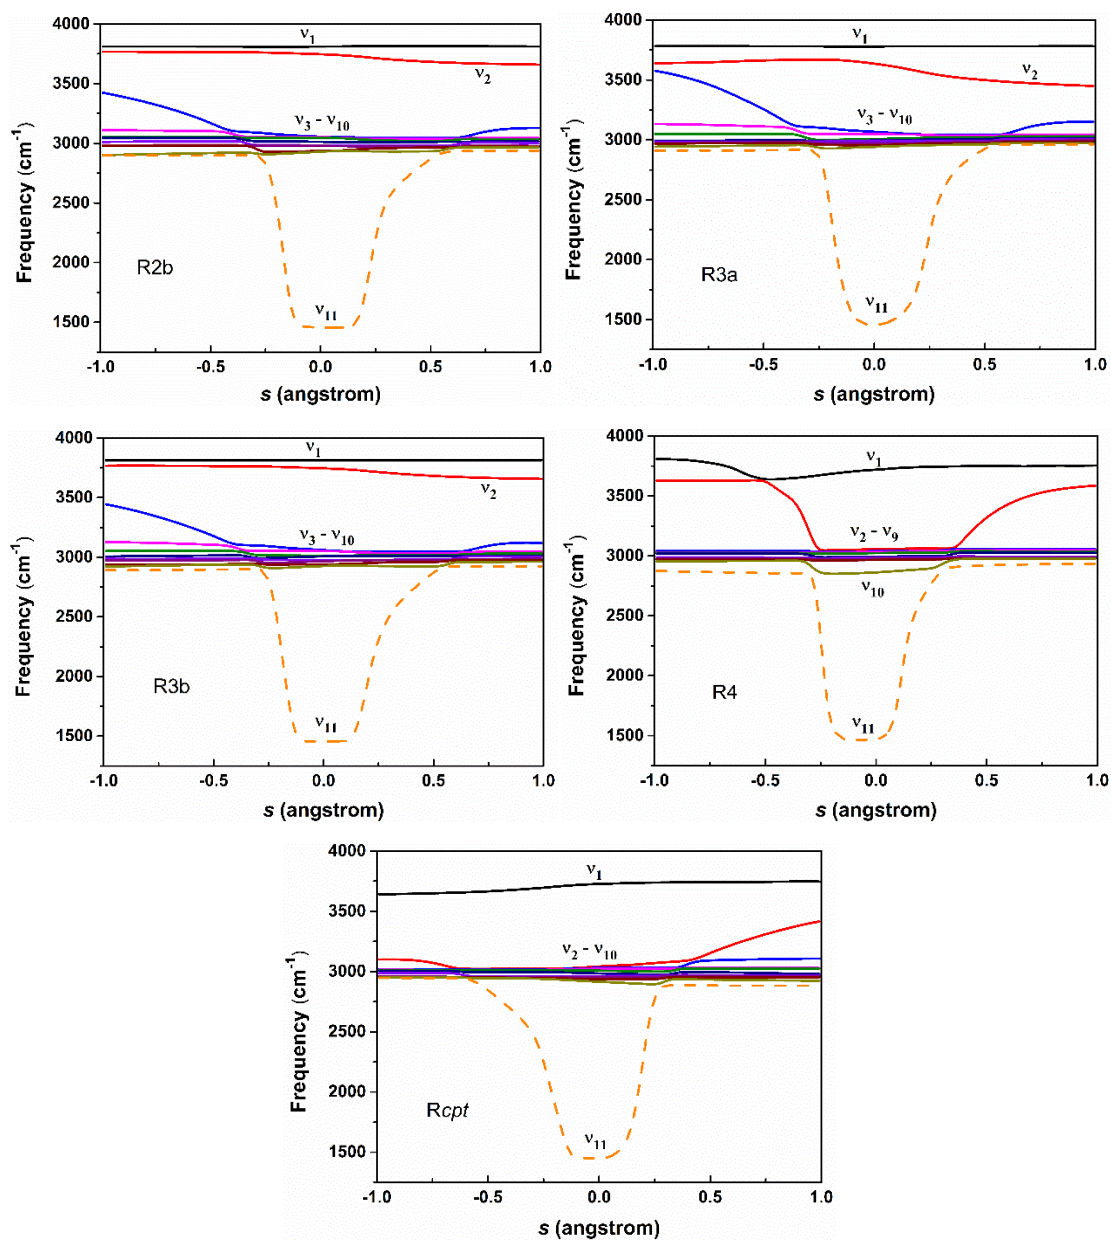

Figure S1 The eleven highest vibrational frequencies for R2b, R3a, R3b, R4 and Rcpt as functions of the reaction coordinate ( $s$ ). The saddle points are located at  $s = 0$ .

## 9. Vibrationally adiabatic ground energy along MEPs

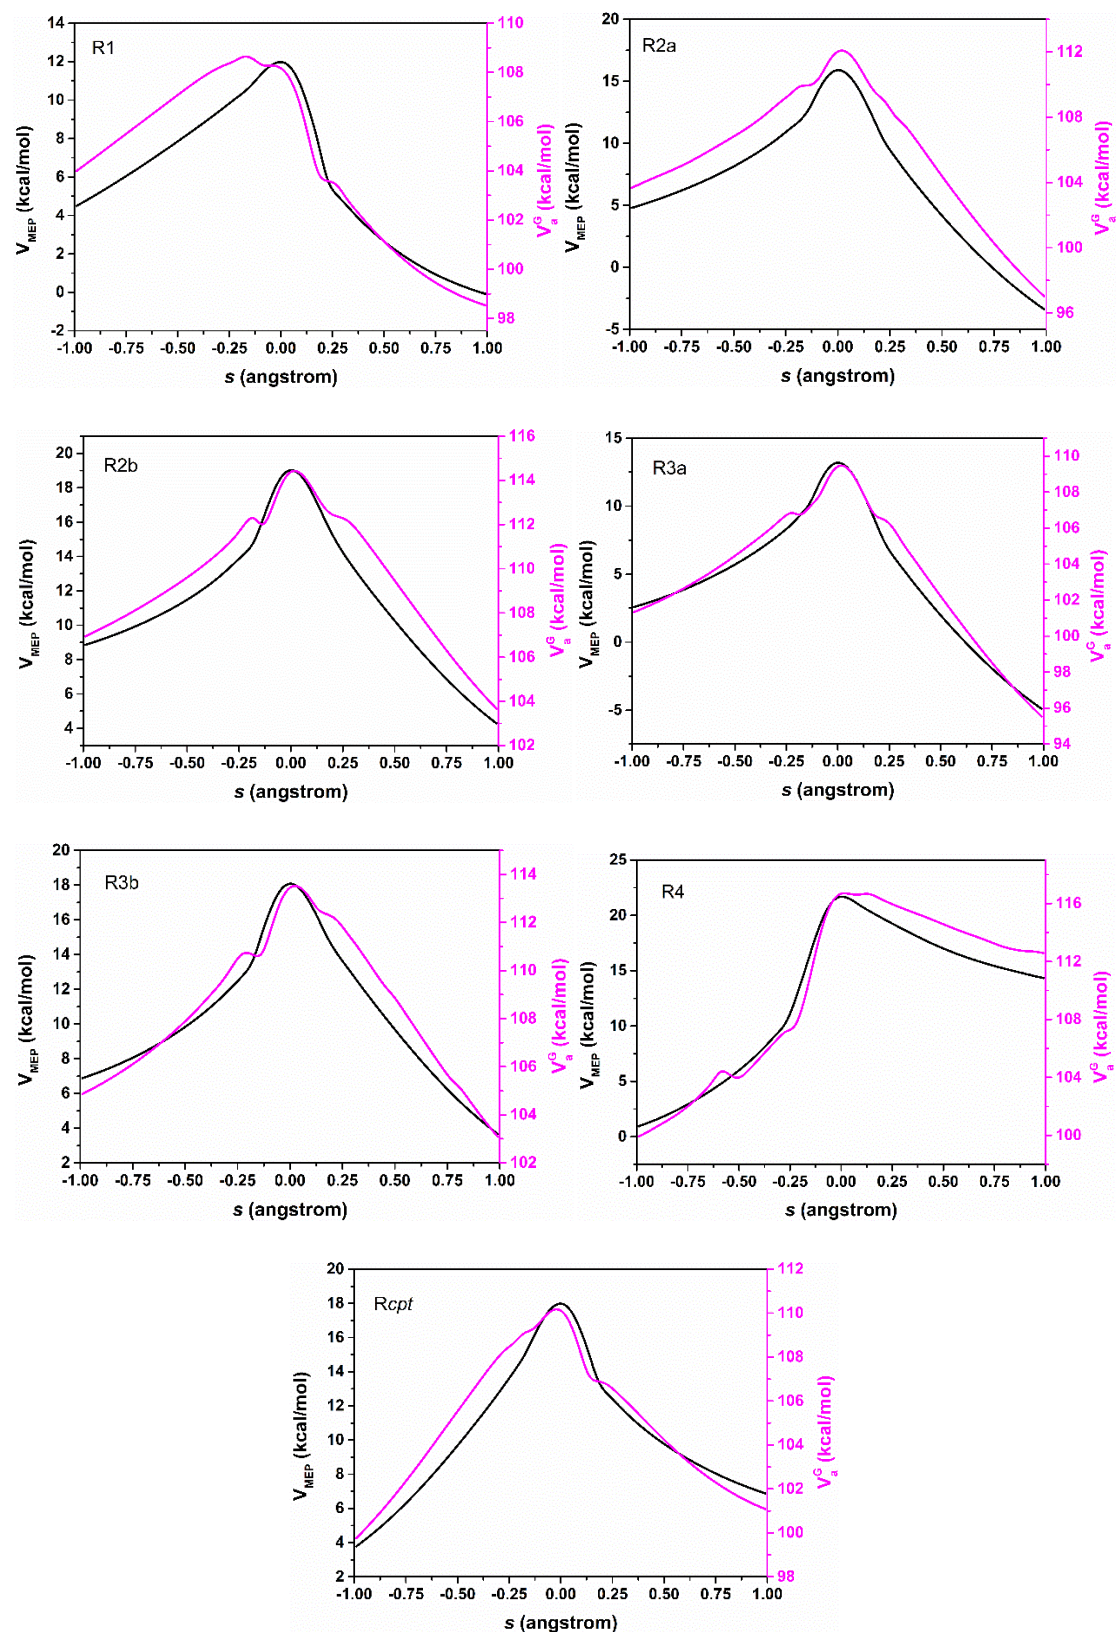

Fig. S2 The potential energy ( $V_{\text{MEP}}$ ) and vibrationally adiabatic ground energy ( $V_a^G$ ) with respect to the reaction coordinate ( $s$ ).

## 10. Tabulated rate constants using different methods

From Fig. S3, the SS-QH-TST method is observed to significantly underestimate rate constants as compared with MS-T-CVT/SCT method except for R1. The ratios of  $k^{\text{MS-T-CVT/SCT}}$  to  $k^{\text{SS-QH-TST}}$  lie in the range of 0.8 – 1486 at atmospheric conditions (200 – 500 K) and are within 0.8 – 22.7 at typical combustion conditions (500 – 2000 K). This significant deviation at low temperatures is mainly caused by the multi-dimensional tunneling effect and the key factor is superseded by the anharmonicity effect at high temperatures, while the variational effect is moderate over the entire temperature range. The ratios of  $k^{\text{MS-T-TST/Eckart}}$  to  $k^{\text{MS-T-CVT/SCT}}$  lie in the range of 0.35 – 17.6, and the largest discrepancy is observed in the case of  $\alpha$ -carbon site (R1) caused by the strong variational effect. The ratios of  $k^{\text{MS-T-TST/Eckart}}$  to  $k^{\text{MS-T-CVT/SCT}}$  lie in the range of 0.35 – 17.6. To facilitate usage for various purposes, numerical values in tabular form calculated using three different methods are also provided in Table S12.

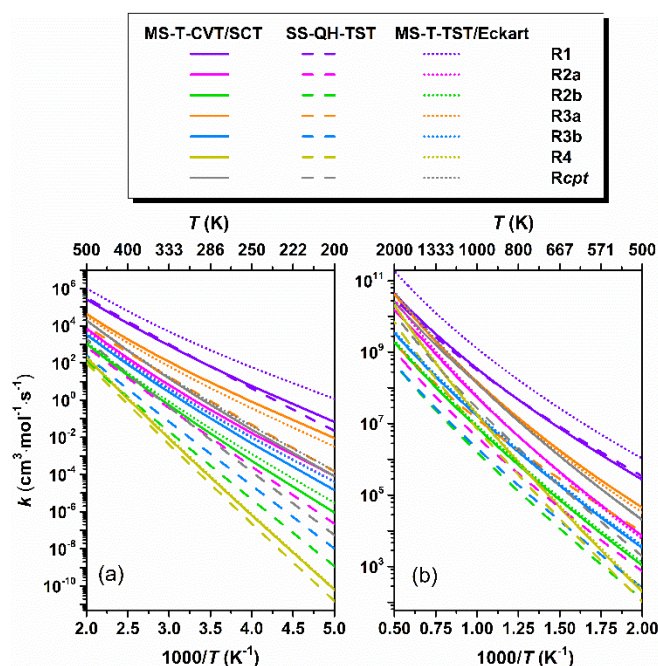

Fig. S3 The site-specific rate constants per hydrogen atom of H-atom abstraction reactions from cyclopentanol and cyclopentane by  $\text{HO}_2$  calculated by MS-T-CVT/SCT (solid lines), MS-T-TST/Eckart (dotted lines) and SS-QH-TST (dashed lines) methods over the temperature range of (a) 200 – 500 K and (b) 500–2000 K.

Table S12 The site-specific rate constants per hydrogen atom of H-atom abstraction reactions from cyclopentanol and cyclopentane by HO<sub>2</sub> radical calculated using MS-T-CVT/SCT method.

| T (K)                    | R1       | R2a      | R2b      | R3a      | R3b      | R4       | <i>R<sub>cpt</sub></i> |
|--------------------------|----------|----------|----------|----------|----------|----------|------------------------|
| <b>Forward reactions</b> |          |          |          |          |          |          |                        |
| 200                      | 6.71E-02 | 8.22E-05 | 8.92E-07 | 9.03E-03 | 1.45E-05 | 6.26E-11 | 8.14E-05               |
| 250                      | 5.68E+00 | 1.67E-02 | 5.38E-04 | 8.12E-01 | 4.69E-03 | 6.30E-07 | 2.53E-02               |
| 300                      | 1.48E+02 | 8.05E-01 | 5.01E-02 | 2.04E+01 | 2.98E-01 | 3.39E-04 | 1.61E+00               |
| 350                      | 1.82E+03 | 1.62E+01 | 1.50E+00 | 2.46E+02 | 6.96E+00 | 3.39E-02 | 3.78E+01               |
| 400                      | 1.34E+04 | 1.81E+02 | 2.14E+01 | 1.87E+03 | 8.30E+01 | 1.17E+00 | 4.62E+02               |
| 450                      | 6.84E+04 | 1.33E+03 | 1.82E+02 | 1.02E+04 | 6.20E+02 | 1.95E+01 | 3.59E+03               |
| 500                      | 2.67E+05 | 7.15E+03 | 1.07E+03 | 4.42E+04 | 3.30E+03 | 1.96E+02 | 1.98E+04               |
| 550                      | 8.58E+05 | 3.02E+04 | 4.74E+03 | 1.58E+05 | 1.36E+04 | 1.36E+03 | 8.41E+04               |
| 600                      | 2.35E+06 | 1.06E+05 | 1.70E+04 | 4.81E+05 | 4.58E+04 | 7.04E+03 | 2.94E+05               |
| 650                      | 5.69E+06 | 3.17E+05 | 5.17E+04 | 1.30E+06 | 1.32E+05 | 2.92E+04 | 8.76E+05               |
| 700                      | 1.24E+07 | 8.43E+05 | 1.37E+05 | 3.16E+06 | 3.35E+05 | 1.02E+05 | 2.30E+06               |
| 750                      | 2.49E+07 | 2.02E+06 | 3.23E+05 | 7.02E+06 | 7.62E+05 | 3.06E+05 | 5.43E+06               |
| 800                      | 4.68E+07 | 4.43E+06 | 6.98E+05 | 1.45E+07 | 1.61E+06 | 8.15E+05 | 1.18E+07               |
| 850                      | 8.26E+07 | 9.05E+06 | 1.39E+06 | 2.80E+07 | 3.13E+06 | 1.97E+06 | 2.36E+07               |
| 900                      | 1.39E+08 | 1.73E+07 | 2.61E+06 | 5.12E+07 | 5.73E+06 | 4.37E+06 | 4.45E+07               |
| 950                      | 2.23E+08 | 3.14E+07 | 4.61E+06 | 8.91E+07 | 9.93E+06 | 9.04E+06 | 7.94E+07               |
| 1000                     | 3.46E+08 | 5.44E+07 | 7.74E+06 | 1.48E+08 | 1.64E+07 | 1.75E+07 | 1.35E+08               |
| 1100                     | 7.57E+08 | 1.44E+08 | 1.95E+07 | 3.70E+08 | 4.02E+07 | 5.68E+07 | 3.27E+08               |
| 1200                     | 1.49E+09 | 3.34E+08 | 4.29E+07 | 8.17E+08 | 8.65E+07 | 1.56E+08 | 6.86E+08               |
| 1300                     | 2.69E+09 | 7.01E+08 | 8.52E+07 | 1.63E+09 | 1.68E+08 | 3.73E+08 | 1.31E+09               |
| 1400                     | 4.56E+09 | 1.34E+09 | 1.55E+08 | 3.03E+09 | 3.02E+08 | 8.07E+08 | 2.32E+09               |
| 1500                     | 7.29E+09 | 2.39E+09 | 2.64E+08 | 5.26E+09 | 5.06E+08 | 1.60E+09 | 3.85E+09               |
| 1600                     | 1.12E+10 | 3.74E+09 | 4.24E+08 | 8.64E+09 | 8.05E+08 | 2.94E+09 | 6.08E+09               |
| 1700                     | 1.65E+10 | 5.59E+09 | 6.50E+08 | 1.35E+10 | 1.22E+09 | 5.13E+09 | 9.20E+09               |
| 1800                     | 2.34E+10 | 8.05E+09 | 9.53E+08 | 2.04E+10 | 1.78E+09 | 8.44E+09 | 1.34E+10               |



|      |          |          |          |          |          |          |          |
|------|----------|----------|----------|----------|----------|----------|----------|
| 1900 | 3.24E+10 | 1.12E+10 | 1.36E+09 | 2.97E+10 | 2.50E+09 | 1.33E+10 | 1.89E+10 |
| 2000 | 4.36E+10 | 1.53E+10 | 1.87E+09 | 4.21E+10 | 3.43E+09 | 2.03E+10 | 2.61E+10 |

**Reverse reactions**

|      |          |          |          |          |          |          |          |
|------|----------|----------|----------|----------|----------|----------|----------|
| 200  | 8.40E+04 | 1.36E+06 | 2.19E+05 | 2.81E+07 | 1.98E+05 | 6.60E+08 | 1.30E+06 |
| 250  | 4.39E+05 | 2.38E+06 | 6.89E+05 | 3.41E+07 | 6.14E+05 | 1.17E+09 | 4.26E+06 |
| 300  | 1.75E+06 | 4.64E+06 | 1.86E+06 | 4.69E+07 | 1.70E+06 | 1.99E+09 | 1.25E+07 |
| 350  | 5.47E+06 | 9.17E+06 | 4.33E+06 | 6.93E+07 | 4.10E+06 | 3.24E+09 | 3.17E+07 |
| 400  | 1.42E+07 | 1.76E+07 | 8.87E+06 | 1.07E+08 | 8.72E+06 | 5.07E+09 | 7.14E+07 |
| 450  | 3.21E+07 | 3.24E+07 | 1.64E+07 | 1.66E+08 | 1.68E+07 | 7.64E+09 | 1.47E+08 |
| 500  | 6.45E+07 | 5.67E+07 | 2.82E+07 | 2.60E+08 | 2.98E+07 | 1.12E+10 | 2.75E+08 |
| 550  | 1.20E+08 | 9.48E+07 | 4.53E+07 | 3.98E+08 | 4.93E+07 | 1.59E+10 | 4.78E+08 |
| 600  | 2.06E+08 | 1.52E+08 | 6.91E+07 | 5.98E+08 | 7.77E+07 | 2.20E+10 | 7.89E+08 |
| 650  | 3.36E+08 | 2.34E+08 | 1.01E+08 | 8.83E+08 | 1.17E+08 | 2.98E+10 | 1.24E+09 |
| 700  | 5.21E+08 | 3.51E+08 | 1.43E+08 | 1.27E+09 | 1.69E+08 | 3.97E+10 | 1.87E+09 |
| 750  | 7.77E+08 | 5.10E+08 | 1.95E+08 | 1.78E+09 | 2.35E+08 | 5.19E+10 | 2.73E+09 |
| 800  | 1.12E+09 | 7.17E+08 | 2.61E+08 | 2.46E+09 | 3.21E+08 | 6.67E+10 | 3.87E+09 |
| 850  | 1.57E+09 | 9.92E+08 | 3.40E+08 | 3.33E+09 | 4.27E+08 | 8.47E+10 | 5.31E+09 |
| 900  | 2.14E+09 | 1.34E+09 | 4.34E+08 | 4.42E+09 | 5.54E+08 | 1.06E+11 | 7.16E+09 |
| 950  | 2.86E+09 | 1.77E+09 | 5.45E+08 | 5.78E+09 | 7.07E+08 | 1.31E+11 | 9.43E+09 |
| 1000 | 3.75E+09 | 2.32E+09 | 6.72E+08 | 7.42E+09 | 8.87E+08 | 1.60E+11 | 1.22E+10 |
| 1100 | 6.13E+09 | 3.75E+09 | 9.89E+08 | 1.18E+10 | 1.34E+09 | 2.33E+11 | 1.84E+10 |
| 1200 | 9.43E+09 | 5.76E+09 | 1.39E+09 | 1.79E+10 | 1.92E+09 | 3.27E+11 | 2.59E+10 |
| 1300 | 1.39E+10 | 8.53E+09 | 1.89E+09 | 2.59E+10 | 2.66E+09 | 4.45E+11 | 3.53E+10 |
| 1400 | 1.97E+10 | 1.21E+10 | 2.48E+09 | 3.65E+10 | 3.56E+09 | 5.93E+11 | 4.68E+10 |
| 1500 | 2.70E+10 | 1.67E+10 | 3.18E+09 | 4.99E+10 | 4.62E+09 | 7.71E+11 | 6.05E+10 |
| 1600 | 3.62E+10 | 2.07E+10 | 3.99E+09 | 6.66E+10 | 5.87E+09 | 9.81E+11 | 7.66E+10 |
| 1700 | 4.73E+10 | 2.53E+10 | 4.90E+09 | 8.67E+10 | 7.28E+09 | 1.24E+12 | 9.55E+10 |
| 1800 | 6.05E+10 | 3.05E+10 | 5.92E+09 | 1.11E+11 | 8.93E+09 | 1.52E+12 | 1.17E+11 |
| 1900 | 7.61E+10 | 3.63E+10 | 7.08E+09 | 1.39E+11 | 1.07E+10 | 1.86E+12 | 1.42E+11 |



|      |          |          |          |          |          |          |          |
|------|----------|----------|----------|----------|----------|----------|----------|
| 2000 | 9.43E+10 | 4.28E+10 | 8.34E+09 | 1.73E+11 | 1.28E+10 | 2.24E+12 | 1.69E+11 |
|------|----------|----------|----------|----------|----------|----------|----------|

Table S13 The site-specific rate constants per hydrogen atom of H-atom abstraction reactions from cyclopentanol and cyclopentane by HO<sub>2</sub> radical calculated using MS-LH-CVT/SCT method.

| T (K)                    | R1       | R2a      | R2b      | R3a      | R3b      | R4       | <i>R<sub>cpt</sub></i> |
|--------------------------|----------|----------|----------|----------|----------|----------|------------------------|
| <b>Forward reactions</b> |          |          |          |          |          |          |                        |
| 200                      | 9.60E-02 | 1.10E-04 | 1.08E-06 | 1.13E-02 | 1.68E-05 | 7.46E-11 | 1.31E-04               |
| 250                      | 7.93E+00 | 2.21E-02 | 6.18E-04 | 9.69E-01 | 5.14E-03 | 7.17E-07 | 4.02E-02               |
| 300                      | 2.01E+02 | 1.05E+00 | 5.52E-02 | 2.30E+01 | 3.11E-01 | 3.69E-04 | 2.51E+00               |
| 350                      | 2.39E+03 | 2.05E+01 | 1.60E+00 | 2.64E+02 | 6.91E+00 | 3.52E-02 | 5.79E+01               |
| 400                      | 1.69E+04 | 2.23E+02 | 2.22E+01 | 1.94E+03 | 7.89E+01 | 1.16E+00 | 6.95E+02               |
| 450                      | 8.35E+04 | 1.59E+03 | 1.85E+02 | 1.05E+04 | 5.67E+02 | 1.86E+01 | 5.32E+03               |
| 500                      | 3.15E+05 | 8.28E+03 | 1.06E+03 | 4.50E+04 | 2.91E+03 | 1.79E+02 | 2.89E+04               |
| 550                      | 9.76E+05 | 3.39E+04 | 4.66E+03 | 1.61E+05 | 1.16E+04 | 1.19E+03 | 1.21E+05               |
| 600                      | 2.59E+06 | 1.15E+05 | 1.65E+04 | 4.99E+05 | 3.81E+04 | 5.96E+03 | 4.18E+05               |
| 650                      | 6.06E+06 | 3.35E+05 | 4.96E+04 | 1.37E+06 | 1.07E+05 | 2.39E+04 | 1.23E+06               |
| 700                      | 1.28E+07 | 8.67E+05 | 1.30E+05 | 3.39E+06 | 2.66E+05 | 8.04E+04 | 3.21E+06               |
| 750                      | 2.51E+07 | 2.03E+06 | 3.05E+05 | 7.67E+06 | 5.94E+05 | 2.35E+05 | 7.51E+06               |
| 800                      | 4.59E+07 | 4.34E+06 | 6.56E+05 | 1.61E+07 | 1.23E+06 | 6.10E+05 | 1.62E+07               |
| 850                      | 7.93E+07 | 8.69E+06 | 1.31E+06 | 3.18E+07 | 2.37E+06 | 1.44E+06 | 3.23E+07               |
| 900                      | 1.30E+08 | 1.63E+07 | 2.43E+06 | 5.92E+07 | 4.28E+06 | 3.12E+06 | 6.07E+07               |
| 950                      | 2.06E+08 | 2.90E+07 | 4.30E+06 | 1.05E+08 | 7.34E+06 | 6.33E+06 | 1.08E+08               |
| 1000                     | 3.13E+08 | 4.95E+07 | 7.22E+06 | 1.78E+08 | 1.20E+07 | 1.20E+07 | 1.83E+08               |
| 1100                     | 6.66E+08 | 1.28E+08 | 1.82E+07 | 4.57E+08 | 2.90E+07 | 3.78E+07 | 4.43E+08               |
| 1200                     | 1.28E+09 | 2.89E+08 | 4.03E+07 | 1.04E+09 | 6.19E+07 | 1.01E+08 | 9.32E+08               |
| 1300                     | 2.27E+09 | 5.95E+08 | 8.06E+07 | 2.14E+09 | 1.20E+08 | 2.37E+08 | 1.78E+09               |
| 1400                     | 3.79E+09 | 1.12E+09 | 1.48E+08 | 4.10E+09 | 2.15E+08 | 5.05E+08 | 3.18E+09               |
| 1500                     | 5.98E+09 | 1.98E+09 | 2.55E+08 | 7.33E+09 | 3.61E+08 | 9.88E+08 | 5.34E+09               |
| 1600                     | 9.10E+09 | 3.07E+09 | 4.14E+08 | 1.24E+10 | 5.76E+08 | 1.80E+09 | 8.51E+09               |

|      |          |          |          |          |          |          |          |
|------|----------|----------|----------|----------|----------|----------|----------|
| 1700 | 1.33E+10 | 4.56E+09 | 6.43E+08 | 1.99E+10 | 8.75E+08 | 3.12E+09 | 1.30E+10 |
| 1800 | 1.88E+10 | 6.54E+09 | 9.57E+08 | 3.08E+10 | 1.29E+09 | 5.12E+09 | 1.93E+10 |
| 1900 | 2.60E+10 | 9.11E+09 | 1.38E+09 | 4.61E+10 | 1.83E+09 | 8.07E+09 | 2.75E+10 |
| 2000 | 3.50E+10 | 1.24E+10 | 1.93E+09 | 6.68E+10 | 2.53E+09 | 1.23E+10 | 3.84E+10 |

**Reverse reactions**

|      |          |          |          |          |          |          |          |
|------|----------|----------|----------|----------|----------|----------|----------|
| 200  | 1.20E+05 | 1.82E+06 | 2.65E+05 | 3.52E+07 | 2.29E+05 | 7.87E+08 | 2.09E+06 |
| 250  | 6.13E+05 | 3.15E+06 | 7.91E+05 | 4.07E+07 | 6.73E+05 | 1.34E+09 | 6.76E+06 |
| 300  | 2.36E+06 | 6.05E+06 | 2.05E+06 | 5.30E+07 | 1.77E+06 | 2.16E+09 | 1.95E+07 |
| 350  | 7.18E+06 | 1.16E+07 | 4.61E+06 | 7.45E+07 | 4.07E+06 | 3.36E+09 | 4.86E+07 |
| 400  | 1.80E+07 | 2.17E+07 | 9.21E+06 | 1.11E+08 | 8.29E+06 | 5.04E+09 | 1.07E+08 |
| 450  | 3.91E+07 | 3.87E+07 | 1.67E+07 | 1.71E+08 | 1.53E+07 | 7.27E+09 | 2.17E+08 |
| 500  | 7.60E+07 | 6.56E+07 | 2.80E+07 | 2.64E+08 | 2.62E+07 | 1.02E+10 | 4.01E+08 |
| 550  | 1.36E+08 | 1.06E+08 | 4.45E+07 | 4.07E+08 | 4.22E+07 | 1.39E+10 | 6.88E+08 |
| 600  | 2.27E+08 | 1.65E+08 | 6.70E+07 | 6.20E+08 | 6.46E+07 | 1.86E+10 | 1.12E+09 |
| 650  | 3.58E+08 | 2.48E+08 | 9.72E+07 | 9.29E+08 | 9.46E+07 | 2.44E+10 | 1.74E+09 |
| 700  | 5.38E+08 | 3.61E+08 | 1.36E+08 | 1.36E+09 | 1.34E+08 | 3.14E+10 | 2.61E+09 |
| 750  | 7.83E+08 | 5.11E+08 | 1.84E+08 | 1.95E+09 | 1.83E+08 | 3.99E+10 | 3.77E+09 |
| 800  | 1.10E+09 | 7.03E+08 | 2.45E+08 | 2.74E+09 | 2.46E+08 | 4.99E+10 | 5.32E+09 |
| 850  | 1.51E+09 | 9.52E+08 | 3.19E+08 | 3.78E+09 | 3.23E+08 | 6.19E+10 | 7.27E+09 |
| 900  | 2.01E+09 | 1.26E+09 | 4.04E+08 | 5.11E+09 | 4.14E+08 | 7.55E+10 | 9.76E+09 |
| 950  | 2.64E+09 | 1.64E+09 | 5.08E+08 | 6.81E+09 | 5.22E+08 | 9.17E+10 | 1.28E+10 |
| 1000 | 3.39E+09 | 2.10E+09 | 6.26E+08 | 8.90E+09 | 6.47E+08 | 1.09E+11 | 1.65E+10 |
| 1100 | 5.39E+09 | 3.33E+09 | 9.24E+08 | 1.46E+10 | 9.66E+08 | 1.55E+11 | 2.49E+10 |
| 1200 | 8.12E+09 | 4.98E+09 | 1.31E+09 | 2.27E+10 | 1.38E+09 | 2.12E+11 | 3.53E+10 |
| 1300 | 1.17E+10 | 7.24E+09 | 1.79E+09 | 3.40E+10 | 1.90E+09 | 2.83E+11 | 4.81E+10 |
| 1400 | 1.64E+10 | 1.01E+10 | 2.37E+09 | 4.95E+10 | 2.53E+09 | 3.71E+11 | 6.43E+10 |
| 1500 | 2.21E+10 | 1.38E+10 | 3.07E+09 | 6.96E+10 | 3.29E+09 | 4.76E+11 | 8.39E+10 |
| 1600 | 2.94E+10 | 1.70E+10 | 3.89E+09 | 9.55E+10 | 4.20E+09 | 6.00E+11 | 1.07E+11 |
| 1700 | 3.82E+10 | 2.07E+10 | 4.85E+09 | 1.27E+11 | 5.23E+09 | 7.52E+11 | 1.35E+11 |

|      |          |          |          |          |          |          |          |
|------|----------|----------|----------|----------|----------|----------|----------|
| 1800 | 4.86E+10 | 2.48E+10 | 5.95E+09 | 1.67E+11 | 6.47E+09 | 9.24E+11 | 1.68E+11 |
| 1900 | 6.11E+10 | 2.94E+10 | 7.20E+09 | 2.16E+11 | 7.84E+09 | 1.12E+12 | 2.06E+11 |
| 2000 | 7.56E+10 | 3.47E+10 | 8.61E+09 | 2.74E+11 | 9.41E+09 | 1.36E+12 | 2.50E+11 |

Table S14 The site-specific rate constants per hydrogen atom of H-atom abstraction reactions from cyclopentanol and cyclopentane by HO<sub>2</sub> radical calculated using MS-T-TST/Eckart method.

| T (K)                    | R1       | R2a      | R2b      | R3a      | R3b      | R4       | R <sub>cpt</sub> |
|--------------------------|----------|----------|----------|----------|----------|----------|------------------|
| <b>Forward reactions</b> |          |          |          |          |          |          |                  |
| 200                      | 1.18E+00 | 4.20E-05 | 2.97E-06 | 3.20E-03 | 3.89E-05 | 7.11E-11 | 1.62E-04         |
| 250                      | 5.51E+01 | 9.67E-03 | 1.20E-03 | 3.44E-01 | 8.84E-03 | 7.15E-07 | 3.78E-02         |
| 300                      | 9.84E+02 | 5.06E-01 | 8.50E-02 | 1.02E+01 | 4.49E-01 | 3.93E-04 | 2.01E+00         |
| 350                      | 9.52E+03 | 1.11E+01 | 2.17E+00 | 1.40E+02 | 9.13E+00 | 3.91E-02 | 4.26E+01         |
| 400                      | 6.02E+04 | 1.33E+02 | 2.83E+01 | 1.17E+03 | 1.02E+02 | 1.34E+00 | 4.93E+02         |
| 450                      | 2.81E+05 | 1.04E+03 | 2.28E+02 | 6.98E+03 | 7.33E+02 | 2.23E+01 | 3.72E+03         |
| 500                      | 1.04E+06 | 5.86E+03 | 1.30E+03 | 3.22E+04 | 3.83E+03 | 2.22E+02 | 2.03E+04         |
| 550                      | 3.20E+06 | 2.59E+04 | 5.66E+03 | 1.21E+05 | 1.56E+04 | 1.55E+03 | 8.62E+04         |
| 600                      | 8.58E+06 | 9.44E+04 | 2.00E+04 | 3.88E+05 | 5.24E+04 | 7.89E+03 | 3.02E+05         |
| 650                      | 2.04E+07 | 2.95E+05 | 6.04E+04 | 1.10E+06 | 1.51E+05 | 3.33E+04 | 8.99E+05         |
| 700                      | 4.43E+07 | 8.05E+05 | 1.59E+05 | 2.73E+06 | 3.81E+05 | 1.12E+05 | 2.38E+06         |
| 750                      | 8.90E+07 | 1.99E+06 | 3.75E+05 | 6.21E+06 | 8.72E+05 | 3.37E+05 | 5.66E+06         |
| 800                      | 1.67E+08 | 4.47E+06 | 8.06E+05 | 1.31E+07 | 1.83E+06 | 9.03E+05 | 1.23E+07         |
| 850                      | 2.96E+08 | 9.33E+06 | 1.61E+06 | 2.58E+07 | 3.56E+06 | 2.15E+06 | 2.49E+07         |
| 900                      | 5.02E+08 | 1.83E+07 | 3.01E+06 | 4.79E+07 | 6.52E+06 | 4.75E+06 | 4.72E+07         |
| 950                      | 8.10E+08 | 3.38E+07 | 5.33E+06 | 8.44E+07 | 1.13E+07 | 9.86E+06 | 8.47E+07         |
| 1000                     | 1.27E+09 | 5.95E+07 | 8.94E+06 | 1.43E+08 | 1.87E+07 | 1.91E+07 | 1.45E+08         |
| 1100                     | 2.81E+09 | 1.64E+08 | 2.25E+07 | 3.62E+08 | 4.56E+07 | 6.13E+07 | 3.78E+08         |
| 1200                     | 5.62E+09 | 3.93E+08 | 4.93E+07 | 8.11E+08 | 9.81E+07 | 1.66E+08 | 8.64E+08         |
| 1300                     | 1.04E+10 | 8.42E+08 | 9.80E+07 | 1.66E+09 | 1.90E+08 | 4.08E+08 | 1.78E+09         |
| 1400                     | 1.79E+10 | 1.66E+09 | 1.78E+08 | 3.08E+09 | 3.41E+08 | 8.55E+08 | 3.37E+09         |

|      |          |          |          |          |          |          |          |
|------|----------|----------|----------|----------|----------|----------|----------|
| 1500 | 2.91E+10 | 3.05E+09 | 3.02E+08 | 5.41E+09 | 5.72E+08 | 1.70E+09 | 5.96E+09 |
| 1600 | 4.52E+10 | 5.25E+09 | 4.84E+08 | 8.91E+09 | 9.06E+08 | 3.14E+09 | 9.91E+09 |
| 1700 | 6.74E+10 | 8.59E+09 | 7.41E+08 | 1.41E+10 | 1.37E+09 | 5.41E+09 | 1.57E+10 |
| 1800 | 9.74E+10 | 1.35E+10 | 1.09E+09 | 2.13E+10 | 1.99E+09 | 8.85E+09 | 2.39E+10 |
| 1900 | 1.36E+11 | 2.03E+10 | 1.54E+09 | 3.11E+10 | 2.80E+09 | 1.40E+10 | 3.52E+10 |
| 2000 | 1.85E+11 | 2.96E+10 | 2.12E+09 | 4.40E+10 | 3.83E+09 | 2.12E+10 | 5.01E+10 |

**Reverse reactions**

|      |          |          |          |          |          |          |          |
|------|----------|----------|----------|----------|----------|----------|----------|
| 200  | 1.48E+06 | 6.95E+05 | 7.29E+05 | 9.96E+06 | 5.30E+05 | 7.50E+08 | 2.59E+06 |
| 250  | 4.26E+06 | 1.38E+06 | 1.54E+06 | 1.45E+07 | 1.16E+06 | 1.33E+09 | 6.35E+06 |
| 300  | 1.16E+07 | 2.92E+06 | 3.16E+06 | 2.35E+07 | 2.55E+06 | 2.31E+09 | 1.56E+07 |
| 350  | 2.86E+07 | 6.29E+06 | 6.26E+06 | 3.95E+07 | 5.37E+06 | 3.74E+09 | 3.57E+07 |
| 400  | 6.40E+07 | 1.29E+07 | 1.17E+07 | 6.69E+07 | 1.07E+07 | 5.82E+09 | 7.62E+07 |
| 450  | 1.32E+08 | 2.53E+07 | 2.06E+07 | 1.13E+08 | 1.98E+07 | 8.72E+09 | 1.52E+08 |
| 500  | 2.51E+08 | 4.64E+07 | 3.43E+07 | 1.89E+08 | 3.45E+07 | 1.26E+10 | 2.82E+08 |
| 550  | 4.46E+08 | 8.12E+07 | 5.40E+07 | 3.06E+08 | 5.68E+07 | 1.81E+10 | 4.90E+08 |
| 600  | 7.53E+08 | 1.36E+08 | 8.12E+07 | 4.82E+08 | 8.89E+07 | 2.46E+10 | 8.11E+08 |
| 650  | 1.21E+09 | 2.18E+08 | 1.18E+08 | 7.46E+08 | 1.33E+08 | 3.40E+10 | 1.27E+09 |
| 700  | 1.86E+09 | 3.35E+08 | 1.66E+08 | 1.10E+09 | 1.92E+08 | 4.38E+10 | 1.94E+09 |
| 750  | 2.78E+09 | 5.01E+08 | 2.27E+08 | 1.58E+09 | 2.69E+08 | 5.73E+10 | 2.84E+09 |
| 800  | 4.01E+09 | 7.24E+08 | 3.01E+08 | 2.23E+09 | 3.66E+08 | 7.39E+10 | 4.04E+09 |
| 850  | 5.63E+09 | 1.02E+09 | 3.92E+08 | 3.07E+09 | 4.85E+08 | 9.24E+10 | 5.61E+09 |
| 900  | 7.76E+09 | 1.41E+09 | 5.01E+08 | 4.14E+09 | 6.31E+08 | 1.15E+11 | 7.59E+09 |
| 950  | 1.04E+10 | 1.91E+09 | 6.30E+08 | 5.47E+09 | 8.04E+08 | 1.43E+11 | 1.01E+10 |
| 1000 | 1.38E+10 | 2.53E+09 | 7.75E+08 | 7.15E+09 | 1.01E+09 | 1.74E+11 | 1.31E+10 |
| 1100 | 2.28E+10 | 4.27E+09 | 1.14E+09 | 1.15E+10 | 1.52E+09 | 2.51E+11 | 2.13E+10 |
| 1200 | 3.57E+10 | 6.78E+09 | 1.60E+09 | 1.77E+10 | 2.18E+09 | 3.49E+11 | 3.27E+10 |
| 1300 | 5.36E+10 | 1.02E+10 | 2.17E+09 | 2.64E+10 | 3.00E+09 | 4.87E+11 | 4.81E+10 |
| 1400 | 7.73E+10 | 1.50E+10 | 2.85E+09 | 3.72E+10 | 4.01E+09 | 6.28E+11 | 6.81E+10 |
| 1500 | 1.08E+11 | 2.12E+10 | 3.64E+09 | 5.14E+10 | 5.21E+09 | 8.20E+11 | 9.37E+10 |

|      |          |          |          |          |          |          |          |
|------|----------|----------|----------|----------|----------|----------|----------|
| 1600 | 1.46E+11 | 2.91E+10 | 4.55E+09 | 6.86E+10 | 6.60E+09 | 1.05E+12 | 1.25E+11 |
| 1700 | 1.94E+11 | 3.89E+10 | 5.59E+09 | 9.03E+10 | 8.19E+09 | 1.30E+12 | 1.63E+11 |
| 1800 | 2.52E+11 | 5.12E+10 | 6.77E+09 | 1.16E+11 | 9.98E+09 | 1.60E+12 | 2.09E+11 |
| 1900 | 3.20E+11 | 6.56E+10 | 8.04E+09 | 1.46E+11 | 1.20E+10 | 1.95E+12 | 2.63E+11 |
| 2000 | 4.00E+11 | 8.29E+10 | 9.46E+09 | 1.81E+11 | 1.42E+10 | 2.34E+12 | 3.26E+11 |

Table S15 The site-specific rate constants per hydrogen atom of H-atom abstraction reactions from cyclopentanol and cyclopentane by HO<sub>2</sub> radical calculated using SS-QH-TST method.

| T (K)                    | R1       | R2a      | R2b      | R3a      | R3b      | R4       | <i>R<sub>cpt</sub></i> |
|--------------------------|----------|----------|----------|----------|----------|----------|------------------------|
| <b>Forward reactions</b> |          |          |          |          |          |          |                        |
| 200                      | 2.22E-02 | 2.23E-07 | 1.16E-09 | 1.47E-04 | 1.03E-08 | 1.52E-11 | 5.48E-08               |
| 250                      | 4.30E+00 | 2.66E-04 | 4.56E-06 | 4.71E-02 | 2.52E-05 | 2.32E-07 | 1.38E-04               |
| 300                      | 1.58E+02 | 3.23E-02 | 1.20E-03 | 2.37E+00 | 4.82E-03 | 1.54E-04 | 2.82E-02               |
| 350                      | 2.22E+03 | 1.06E+00 | 6.81E-02 | 4.14E+01 | 2.17E-01 | 1.69E-02 | 1.36E+00               |
| 400                      | 1.70E+04 | 1.54E+01 | 1.47E+00 | 3.74E+02 | 3.94E+00 | 6.08E-01 | 2.64E+01               |
| 450                      | 8.68E+04 | 1.29E+02 | 1.66E+01 | 2.17E+03 | 3.89E+01 | 1.03E+01 | 2.79E+02               |
| 500                      | 3.32E+05 | 7.32E+02 | 1.19E+02 | 9.15E+03 | 2.50E+02 | 1.03E+02 | 1.93E+03               |
| 550                      | 1.03E+06 | 3.14E+03 | 6.12E+02 | 3.08E+04 | 1.18E+03 | 6.98E+02 | 9.68E+03               |
| 600                      | 2.73E+06 | 1.09E+04 | 2.44E+03 | 8.69E+04 | 4.39E+03 | 3.55E+03 | 3.83E+04               |
| 650                      | 6.36E+06 | 3.19E+04 | 8.07E+03 | 2.14E+05 | 1.36E+04 | 1.43E+04 | 1.25E+05               |
| 700                      | 1.34E+07 | 8.19E+04 | 2.28E+04 | 4.74E+05 | 3.64E+04 | 4.85E+04 | 3.56E+05               |
| 750                      | 2.60E+07 | 1.89E+05 | 5.68E+04 | 9.62E+05 | 8.67E+04 | 1.41E+05 | 8.95E+05               |
| 800                      | 4.71E+07 | 3.99E+05 | 1.28E+05 | 1.82E+06 | 1.88E+05 | 3.68E+05 | 2.03E+06               |
| 850                      | 8.08E+07 | 7.81E+05 | 2.65E+05 | 3.21E+06 | 3.74E+05 | 8.67E+05 | 4.27E+06               |
| 900                      | 1.32E+08 | 1.44E+06 | 5.10E+05 | 5.42E+06 | 6.98E+05 | 1.88E+06 | 8.36E+06               |
| 950                      | 2.07E+08 | 2.52E+06 | 9.26E+05 | 8.74E+06 | 1.23E+06 | 3.80E+06 | 1.54E+07               |
| 1000                     | 3.14E+08 | 4.19E+06 | 1.59E+06 | 1.36E+07 | 2.06E+06 | 7.22E+06 | 2.70E+07               |
| 1100                     | 6.59E+08 | 1.04E+07 | 4.15E+06 | 2.97E+07 | 5.13E+06 | 2.25E+07 | 7.30E+07               |
| 1200                     | 1.25E+09 | 2.29E+07 | 9.39E+06 | 5.89E+07 | 1.12E+07 | 5.97E+07 | 1.72E+08               |

|      |          |          |          |          |          |          |          |
|------|----------|----------|----------|----------|----------|----------|----------|
| 1300 | 2.22E+09 | 4.54E+07 | 1.91E+07 | 1.07E+08 | 2.20E+07 | 1.40E+08 | 3.64E+08 |
| 1400 | 3.67E+09 | 8.36E+07 | 3.55E+07 | 1.83E+08 | 4.00E+07 | 2.94E+08 | 7.06E+08 |
| 1500 | 5.80E+09 | 1.44E+08 | 6.18E+07 | 2.96E+08 | 6.78E+07 | 5.73E+08 | 1.28E+09 |
| 1600 | 8.77E+09 | 2.36E+08 | 1.01E+08 | 4.56E+08 | 1.09E+08 | 1.04E+09 | 2.17E+09 |
| 1700 | 1.28E+10 | 3.68E+08 | 1.58E+08 | 6.78E+08 | 1.66E+08 | 1.79E+09 | 3.50E+09 |
| 1800 | 1.81E+10 | 5.54E+08 | 2.36E+08 | 9.75E+08 | 2.44E+08 | 2.92E+09 | 5.44E+09 |
| 1900 | 2.48E+10 | 8.04E+08 | 3.40E+08 | 1.36E+09 | 3.48E+08 | 4.58E+09 | 8.15E+09 |
| 2000 | 3.34E+10 | 1.14E+09 | 4.76E+08 | 1.85E+09 | 4.82E+08 | 6.92E+09 | 1.18E+10 |

**Reverse reactions**

|      |          |          |          |          |          |          |          |
|------|----------|----------|----------|----------|----------|----------|----------|
| 200  | 2.78E+04 | 3.69E+03 | 2.85E+02 | 4.57E+05 | 1.40E+02 | 1.60E+08 | 8.74E+02 |
| 250  | 3.32E+05 | 3.79E+04 | 5.84E+03 | 1.98E+06 | 3.30E+03 | 4.32E+08 | 2.32E+04 |
| 300  | 1.86E+06 | 1.86E+05 | 4.46E+04 | 5.46E+06 | 2.74E+04 | 9.03E+08 | 2.19E+05 |
| 350  | 6.67E+06 | 6.01E+05 | 1.96E+05 | 1.17E+07 | 1.28E+05 | 1.62E+09 | 1.14E+06 |
| 400  | 1.81E+07 | 1.50E+06 | 6.10E+05 | 2.14E+07 | 4.14E+05 | 2.64E+09 | 4.08E+06 |
| 450  | 4.07E+07 | 3.14E+06 | 1.50E+06 | 3.53E+07 | 1.05E+06 | 4.03E+09 | 1.14E+07 |
| 500  | 8.01E+07 | 5.80E+06 | 3.14E+06 | 5.37E+07 | 2.26E+06 | 5.85E+09 | 2.68E+07 |
| 550  | 1.43E+08 | 9.85E+06 | 5.84E+06 | 7.78E+07 | 4.29E+06 | 8.16E+09 | 5.51E+07 |
| 600  | 2.39E+08 | 1.57E+07 | 9.91E+06 | 1.08E+08 | 7.44E+06 | 1.11E+10 | 1.03E+08 |
| 650  | 3.76E+08 | 2.36E+07 | 1.58E+07 | 1.45E+08 | 1.20E+07 | 1.46E+10 | 1.77E+08 |
| 700  | 5.63E+08 | 3.41E+07 | 2.38E+07 | 1.90E+08 | 1.83E+07 | 1.90E+10 | 2.90E+08 |
| 750  | 8.11E+08 | 4.76E+07 | 3.43E+07 | 2.45E+08 | 2.67E+07 | 2.40E+10 | 4.50E+08 |
| 800  | 1.13E+09 | 6.46E+07 | 4.78E+07 | 3.09E+08 | 3.76E+07 | 3.01E+10 | 6.67E+08 |
| 850  | 1.54E+09 | 8.56E+07 | 6.45E+07 | 3.82E+08 | 5.10E+07 | 3.73E+10 | 9.62E+08 |
| 900  | 2.04E+09 | 1.11E+08 | 8.48E+07 | 4.68E+08 | 6.76E+07 | 4.55E+10 | 1.34E+09 |
| 950  | 2.66E+09 | 1.42E+08 | 1.09E+08 | 5.67E+08 | 8.75E+07 | 5.50E+10 | 1.83E+09 |
| 1000 | 3.40E+09 | 1.78E+08 | 1.38E+08 | 6.80E+08 | 1.11E+08 | 6.58E+10 | 2.44E+09 |
| 1100 | 5.34E+09 | 2.71E+08 | 2.11E+08 | 9.47E+08 | 1.71E+08 | 9.21E+10 | 4.11E+09 |
| 1200 | 7.93E+09 | 3.95E+08 | 3.04E+08 | 1.29E+09 | 2.49E+08 | 1.25E+11 | 6.51E+09 |
| 1300 | 1.15E+10 | 5.53E+08 | 4.23E+08 | 1.70E+09 | 3.48E+08 | 1.67E+11 | 9.83E+09 |

|      |          |          |          |          |          |          |          |
|------|----------|----------|----------|----------|----------|----------|----------|
| 1400 | 1.58E+10 | 7.54E+08 | 5.68E+08 | 2.21E+09 | 4.71E+08 | 2.16E+11 | 1.43E+10 |
| 1500 | 2.15E+10 | 1.00E+09 | 7.44E+08 | 2.81E+09 | 6.18E+08 | 2.76E+11 | 2.01E+10 |
| 1600 | 2.84E+10 | 1.31E+09 | 9.49E+08 | 3.51E+09 | 7.94E+08 | 3.47E+11 | 2.74E+10 |
| 1700 | 3.68E+10 | 1.67E+09 | 1.19E+09 | 4.34E+09 | 9.93E+08 | 4.31E+11 | 3.63E+10 |
| 1800 | 4.68E+10 | 2.10E+09 | 1.47E+09 | 5.30E+09 | 1.22E+09 | 5.27E+11 | 4.75E+10 |
| 1900 | 5.83E+10 | 2.60E+09 | 1.77E+09 | 6.38E+09 | 1.49E+09 | 6.38E+11 | 6.09E+10 |
| 2000 | 7.22E+10 | 3.19E+09 | 2.12E+09 | 7.60E+09 | 1.79E+09 | 7.63E+11 | 7.67E+10 |

---

## 11. Fitting parameters of modified Arrhenius equations

Table S16 Fitting parameters of modified Arrhenius equations of the MS-T-CVT/SCT rate constants per H-atom at 200–2000 K<sup>a</sup>.

|             | Forward reactions      |       |        | Reverse reactions     |       |        |
|-------------|------------------------|-------|--------|-----------------------|-------|--------|
|             | $A$                    | $n$   | $E$    | $A$                   | $n$   | $E$    |
| R1          | $1.37 \times 10^{-4}$  | 4.662 | 7.468  | $2.32 \times 10^{-3}$ | 4.206 | 2.032  |
| R2a         | $1.49 \times 10^{-8}$  | 5.811 | 8.994  | $7.96 \times 10^{-7}$ | 5.108 | -0.284 |
| R2b         | $8.28 \times 10^{-4}$  | 4.15  | 11.565 | $5.07 \times 10^{-2}$ | 3.457 | 1.293  |
| R3a         | $1.76 \times 10^{-10}$ | 6.429 | 6.594  | $1.80 \times 10^{-8}$ | 5.721 | -1.767 |
| R3b         | $1.01 \times 10^{-4}$  | 4.469 | 10.312 | $8.02 \times 10^{-3}$ | 3.758 | 1.254  |
| R4          | $5.01 \times 10^{-3}$  | 4.375 | 16.466 | $3.23 \times 10^{-2}$ | 4.182 | -0.607 |
| <i>Rcpt</i> | $3.17 \times 10^{-4}$  | 4.597 | 10.396 | $4.94 \times 10^{-2}$ | 3.877 | 1.523  |

<sup>a</sup> Rate constants are in the unit of  $\text{cm}^3 \cdot \text{mol}^{-1} \cdot \text{s}^{-1}$ .  $E$  is in the unit of  $\text{kcal} \cdot \text{mol}^{-1}$ .



## 12. Temperature-dependent activation energies

From Fig. 17, significant discrepancies of computed activation energies are observed between MS-T-CVT/SCT and SS-QH-TST results. For example, R3a and Rcpt show the largest discrepancies of above two methods with a difference range of -3.78 – 5.55 and -5.22 – -1.68 kcal/mol respectively at 200 – 2000 K. The quantum mechanical tunneling effect is mainly responsible for those deviations at low temperatures, while the deviations noted at high temperatures should be mainly attributed to the importance of anharmonicity effect. The numerical values of activation energies in tabular form are provided in Tables S17. From Fig. S4, it can be noted that activation energies derived from MS-LH-CVT/SCT generally deviates from those obtained by more accurate MS-T-CVT/SCT above 400 K with the maximum deviation being less than 2.02 kcal/mol due to the torsional anharmonicity.

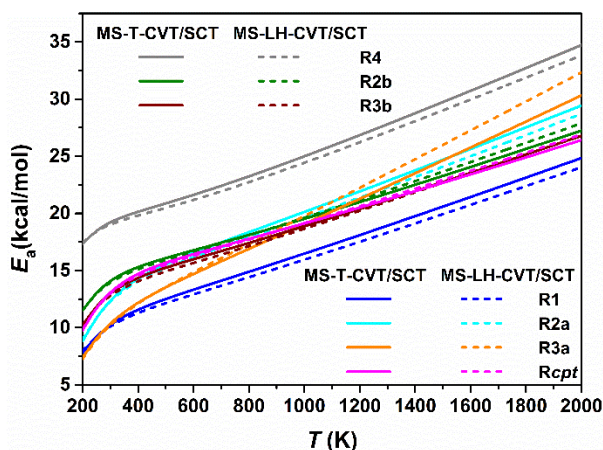

Fig. S4 The activation energies for the forward site-specific reactions for the H-atom abstraction from cyclopentanol and cyclopentane by  $\text{HO}_2$  radical derived from MS-T-CVT/SCT and MS-LH-CVT/SCT rate constants.

Table S17 The temperature-dependent activation energies for H-atom abstraction reactions from cyclopentanol and cyclopentane by  $\text{HO}_2$  radical calculated using MS-T-CVT/SCT method.

| T (K)                    | R1   | R2a  | R2b   | R3a  | R3b   | R4    | Rcpt |
|--------------------------|------|------|-------|------|-------|-------|------|
| <b>Forward reactions</b> |      |      |       |      |       |       |      |
| 200                      | 7.83 | 8.83 | 11.51 | 7.39 | 10.22 | 17.33 | 9.79 |

|                          |       |       |       |       |       |       |       |
|--------------------------|-------|-------|-------|-------|-------|-------|-------|
| 250                      | 9.29  | 10.95 | 13.13 | 9.13  | 11.94 | 18.55 | 11.82 |
| 300                      | 10.28 | 12.43 | 14.14 | 10.41 | 13.04 | 19.25 | 13.15 |
| 350                      | 11.01 | 13.50 | 14.81 | 11.40 | 13.80 | 19.74 | 14.06 |
| 400                      | 11.58 | 14.32 | 15.31 | 12.20 | 14.37 | 20.14 | 14.73 |
| 450                      | 12.07 | 14.98 | 15.73 | 12.90 | 14.84 | 20.51 | 15.25 |
| 500                      | 12.51 | 15.56 | 16.10 | 13.53 | 15.25 | 20.88 | 15.69 |
| 550                      | 12.93 | 16.07 | 16.44 | 14.13 | 15.63 | 21.24 | 16.08 |
| 600                      | 13.33 | 16.56 | 16.78 | 14.70 | 15.99 | 21.62 | 16.44 |
| 650                      | 13.72 | 17.02 | 17.11 | 15.26 | 16.35 | 22.01 | 16.78 |
| 700                      | 14.11 | 17.47 | 17.44 | 15.81 | 16.71 | 22.41 | 17.11 |
| 750                      | 14.50 | 17.91 | 17.78 | 16.35 | 17.06 | 22.82 | 17.45 |
| 800                      | 14.90 | 18.36 | 18.12 | 16.90 | 17.42 | 23.24 | 17.78 |
| 850                      | 15.29 | 18.80 | 18.46 | 17.44 | 17.78 | 23.67 | 18.11 |
| 900                      | 15.68 | 19.24 | 18.81 | 17.98 | 18.14 | 24.10 | 18.44 |
| 950                      | 16.08 | 19.68 | 19.16 | 18.53 | 18.51 | 24.54 | 18.78 |
| 1000                     | 16.48 | 20.13 | 19.52 | 19.08 | 18.88 | 24.99 | 19.12 |
| 1100                     | 17.29 | 21.02 | 20.25 | 20.17 | 19.63 | 25.91 | 19.81 |
| 1200                     | 18.10 | 21.93 | 20.99 | 21.28 | 20.39 | 26.85 | 20.51 |
| 1300                     | 18.93 | 22.84 | 21.74 | 22.39 | 21.17 | 27.80 | 21.22 |
| 1400                     | 19.76 | 23.77 | 22.51 | 23.51 | 21.95 | 28.76 | 21.94 |
| 1500                     | 20.59 | 24.70 | 23.28 | 24.64 | 22.74 | 29.74 | 22.67 |
| 1600                     | 21.44 | 25.63 | 24.06 | 25.77 | 23.54 | 30.72 | 23.41 |
| 1700                     | 22.28 | 26.58 | 24.85 | 26.90 | 24.35 | 31.71 | 24.16 |
| 1800                     | 23.13 | 27.53 | 25.64 | 28.04 | 25.16 | 32.71 | 24.91 |
| 1900                     | 23.99 | 28.48 | 26.44 | 29.18 | 25.97 | 33.72 | 25.66 |
| 2000                     | 24.84 | 29.44 | 27.24 | 30.32 | 26.79 | 34.72 | 26.42 |
| <b>Reverse reactions</b> |       |       |       |       |       |       |       |
| 200                      | 2.74  | 0.78  | 1.83  | 0.33  | 1.78  | 0.86  | 1.70  |
| 250                      | 3.71  | 1.50  | 2.62  | 0.75  | 2.63  | 1.32  | 2.68  |

|      |       |       |       |       |       |       |       |
|------|-------|-------|-------|-------|-------|-------|-------|
| 300  | 4.49  | 2.34  | 3.28  | 1.31  | 3.38  | 1.81  | 3.59  |
| 350  | 5.13  | 3.20  | 3.83  | 1.98  | 4.01  | 2.31  | 4.38  |
| 400  | 5.67  | 4.03  | 4.30  | 2.72  | 4.55  | 2.78  | 5.04  |
| 450  | 6.13  | 4.80  | 4.71  | 3.48  | 5.01  | 3.24  | 5.59  |
| 500  | 6.56  | 5.49  | 5.07  | 4.24  | 5.42  | 3.69  | 6.05  |
| 550  | 6.96  | 6.12  | 5.41  | 4.98  | 5.79  | 4.11  | 6.46  |
| 600  | 7.34  | 6.68  | 5.72  | 5.67  | 6.13  | 4.53  | 6.82  |
| 650  | 7.71  | 7.19  | 6.02  | 6.33  | 6.46  | 4.93  | 7.14  |
| 700  | 8.07  | 7.65  | 6.32  | 6.94  | 6.77  | 5.33  | 7.44  |
| 750  | 8.43  | 8.07  | 6.60  | 7.51  | 7.08  | 5.73  | 7.72  |
| 800  | 8.79  | 8.45  | 6.89  | 8.04  | 7.38  | 6.12  | 7.99  |
| 850  | 9.14  | 8.82  | 7.17  | 8.53  | 7.67  | 6.50  | 8.25  |
| 900  | 9.50  | 9.16  | 7.45  | 8.99  | 7.96  | 6.89  | 8.50  |
| 950  | 9.85  | 9.48  | 7.73  | 9.43  | 8.25  | 7.27  | 8.74  |
| 1000 | 10.21 | 9.79  | 8.01  | 9.84  | 8.54  | 7.66  | 8.99  |
| 1100 | 10.93 | 10.38 | 8.57  | 10.60 | 9.12  | 8.42  | 9.46  |
| 1200 | 11.64 | 10.95 | 9.13  | 11.29 | 9.70  | 9.19  | 9.94  |
| 1300 | 12.37 | 11.49 | 9.69  | 11.94 | 10.28 | 9.96  | 10.41 |
| 1400 | 13.09 | 12.02 | 10.26 | 12.56 | 10.86 | 10.73 | 10.88 |
| 1500 | 13.83 | 12.55 | 10.82 | 13.15 | 11.45 | 11.50 | 11.36 |
| 1600 | 14.56 | 13.07 | 11.39 | 13.73 | 12.03 | 12.27 | 11.83 |
| 1700 | 15.30 | 13.59 | 11.97 | 14.29 | 12.62 | 13.05 | 12.31 |
| 1800 | 16.03 | 14.11 | 12.54 | 14.85 | 13.22 | 13.83 | 12.79 |
| 1900 | 16.78 | 14.63 | 13.12 | 15.39 | 13.81 | 14.60 | 13.28 |
| 2000 | 17.52 | 15.15 | 13.70 | 15.94 | 14.41 | 15.38 | 13.76 |

---

### 13. Optimized geometries and calculated non-scaled frequencies

Table S18 Geometries and non-scaled frequencies of the lowest energy conformers for reaction species obtained at the level of M06-2X/MG3S.

| Species | Geometries (Å) |           |           | Frequencies (cm <sup>-1</sup> ) |           |           |           |
|---------|----------------|-----------|-----------|---------------------------------|-----------|-----------|-----------|
| CPL     | C              | -0.782613 | 0.012112  | 0.352609                        | 35.6956   | 196.4621  | 256.0791  |
|         | C              | 0.021455  | -1.208032 | -0.083608                       | 364.3953  | 475.7271  | 544.9814  |
|         | C              | 1.496035  | -0.751886 | -0.049835                       | 618.1056  | 771.5156  | 824.7866  |
|         | C              | 1.456975  | 0.790531  | 0.107336                        | 897.2032  | 909.6508  | 963.1951  |
|         | C              | 0.015417  | 1.177313  | -0.226711                       | 976.6219  | 992.9944  | 1059.5563 |
|         | H              | -0.776584 | 0.084525  | 1.448211                        | 1091.9917 | 1142.5808 | 1195.4343 |
|         | H              | -0.290743 | -1.451078 | -1.100448                       | 1208.0317 | 1213.2279 | 1269.9522 |
|         | H              | -0.177580 | -2.078903 | 0.537472                        | 1278.5612 | 1304.4364 | 1322.5456 |
|         | H              | 2.041814  | -1.212185 | 0.771814                        | 1334.5753 | 1344.6950 | 1385.5778 |
|         | H              | 2.007947  | -1.038837 | -0.966583                       | 1433.1669 | 1489.8754 | 1499.2542 |
|         | H              | 1.678993  | 1.065762  | 1.139405                        | 1503.2275 | 1527.5451 | 3001.0766 |
|         | H              | 2.186796  | 1.295782  | -0.521905                       | 3092.8853 | 3113.8859 | 3118.7123 |
|         | H              | -0.278873 | 2.147130  | 0.175805                        | 3131.9035 | 3142.9099 | 3901.8707 |
|         | H              | -0.145353 | 1.191000  | -1.307640                       |           |           |           |
|         | O              | -2.109772 | -0.098609 | -0.118277                       |           |           |           |
| H       | -2.611858      | 0.665443  | 0.171337  |                                 |           |           |           |
| CPT     | C              | 0.618087  | -1.118651 | 0.154629                        | 10.6552   | 278.7406  | 548.0241  |
|         | C              | 1.270328  | 0.274443  | -0.010139                       | 614.9242  | 770.8019  | 829.0240  |
|         | C              | 0.097605  | 1.278780  | -0.134710                       | 880.2642  | 902.9477  | 917.7995  |
|         | C              | -1.154498 | 0.482971  | 0.253634                        | 926.1354  | 971.9984  | 1004.2297 |
|         | C              | -0.842718 | -0.921079 | -0.263176                       | 1048.7612 | 1066.9394 | 1186.4214 |
|         | H              | 1.125055  | -1.890525 | -0.422018                       | 1208.9301 | 1232.4704 | 1241.3938 |
|         | H              | 0.651758  | -1.423735 | 1.201796                        | 1288.5041 | 1309.3598 | 1328.2135 |
|         | H              | 1.903268  | 0.309592  | -0.895651                       | 1345.1007 | 1353.0713 | 1355.0768 |
|         | H              | 1.907863  | 0.509196  | 0.840773                        | 1490.4000 | 1495.9406 | 1501.9301 |

|                 |   |           |           |           |            |           |           |
|-----------------|---|-----------|-----------|-----------|------------|-----------|-----------|
|                 | H | 0.239584  | 2.166840  | 0.478767  | 1502.8725  | 1529.0979 | 3053.9669 |
|                 | H | 0.003623  | 1.614489  | -1.168399 | 3061.1359  | 3071.0176 | 3072.5033 |
|                 | H | -1.259184 | 0.453582  | 1.341080  | 3088.0105  | 3110.0535 | 3119.3282 |
|                 | H | -2.070949 | 0.905438  | -0.156164 | 3122.4703  | 3124.3765 | 3137.4407 |
|                 | H | -1.507162 | -1.688721 | 0.131294  |            |           |           |
|                 | H | -0.926682 | -0.934928 | -1.352902 |            |           |           |
|                 | O | 0.054956  | -0.598793 | 0.000000  | 1264.6120  | 1470.4057 | 3705.3984 |
| HO <sub>2</sub> | H | -0.879301 | -0.866630 | 0.000000  |            |           |           |
|                 | O | 0.054956  | 0.707122  | 0.000000  |            |           |           |
|                 | C | 0.035985  | 0.484096  | 0.118902  | -1526.9303 | 48.0090   | 59.2146   |
|                 | C | 1.127199  | 0.901151  | -0.858492 | 113.2927   | 154.0734  | 223.9209  |
|                 | C | 2.322711  | -0.016400 | -0.525983 | 263.1832   | 343.9754  | 385.8361  |
|                 | C | 1.726007  | -1.159693 | 0.310591  | 416.5299   | 522.0504  | 549.6377  |
|                 | C | 0.654440  | -0.456211 | 1.141345  | 557.4677   | 633.9652  | 784.2717  |
|                 | H | -0.771201 | -0.267806 | -0.490387 | 847.7925   | 882.5865  | 913.7028  |
|                 | H | 1.354310  | 1.957834  | -0.715164 | 947.8097   | 972.9861  | 1027.1018 |
|                 | H | 0.793666  | 0.780938  | -1.889177 | 1047.8605  | 1097.3565 | 1109.0104 |
|                 | H | 2.841933  | -0.370120 | -1.414054 | 1166.6131  | 1193.1806 | 1221.2464 |
| SP1             | H | 3.046694  | 0.530082  | 0.079674  | 1237.2373  | 1250.2592 | 1280.3740 |
|                 | H | 1.252332  | -1.897239 | -0.340784 | 1301.9414  | 1330.0370 | 1343.1065 |
|                 | H | 2.468744  | -1.676741 | 0.914539  | 1360.2311  | 1390.1065 | 1424.1692 |
|                 | H | -0.078391 | -1.127870 | 1.588626  | 1481.3191  | 1484.1154 | 1499.1072 |
|                 | H | 1.111889  | 0.143107  | 1.935663  | 1515.7364  | 1550.7096 | 3040.2686 |
|                 | O | -0.727501 | 1.533804  | 0.579888  | 3069.7564  | 3077.8549 | 3081.6341 |
|                 | H | -1.421839 | 1.178379  | 1.146533  | 3115.6572  | 3116.2062 | 3132.9252 |
|                 | O | -2.772410 | -0.362670 | 0.037842  | 3139.8828  | 3811.4081 | 3836.9425 |
|                 | H | -3.188999 | 0.305717  | -0.520471 |            |           |           |
|                 | O | -1.825988 | -0.930377 | -0.794378 |            |           |           |
| SP2a            | C | -0.752149 | 1.001220  | 0.511378  | -1931.7750 | 77.7307   | 141.4664  |

|      |   |           |           |           |            |           |           |
|------|---|-----------|-----------|-----------|------------|-----------|-----------|
|      | C | -1.893862 | 0.437557  | -0.330371 | 165.3507   | 181.7858  | 233.3039  |
|      | C | -1.354776 | -0.910228 | -0.816904 | 305.4973   | 399.9330  | 417.4988  |
|      | C | -0.632145 | -1.471725 | 0.417606  | 450.4250   | 529.9998  | 583.4156  |
|      | C | -0.149935 | -0.242327 | 1.171651  | 609.9429   | 760.6209  | 813.0708  |
|      | H | -1.092274 | 1.733398  | 1.246244  | 849.3582   | 863.7723  | 917.4198  |
|      | H | -2.170325 | 1.125259  | -1.127547 | 934.9271   | 951.9190  | 1009.5983 |
|      | H | -2.763405 | 0.281249  | 0.311217  | 1032.0179  | 1050.5242 | 1077.7876 |
|      | H | -2.135919 | -1.572981 | -1.183555 | 1085.1934  | 1161.0518 | 1185.8051 |
|      | H | -0.643094 | -0.754722 | -1.627578 | 1198.2865  | 1238.8068 | 1262.6383 |
|      | H | -1.326476 | -2.035724 | 1.046380  | 1294.1339  | 1312.9046 | 1341.8490 |
|      | H | 0.185315  | -2.144660 | 0.155521  | 1353.4317  | 1362.6840 | 1414.1814 |
|      | H | -0.174065 | -0.280883 | 2.257671  | 1465.6883  | 1478.3655 | 1484.7179 |
|      | H | 1.155598  | -0.174363 | 0.930806  | 1487.8178  | 1508.4841 | 3050.9282 |
|      | O | 0.156248  | 1.636885  | -0.393062 | 3065.1522  | 3078.1153 | 3091.1561 |
|      | H | 0.933193  | 1.911962  | 0.103876  | 3103.8683  | 3135.3448 | 3142.7245 |
|      | O | 2.018646  | -0.489204 | -0.861011 | 3145.0287  | 3728.0988 | 3857.7727 |
|      | H | 1.553647  | 0.258186  | -1.270408 |            |           |           |
|      | O | 2.221982  | -0.051893 | 0.433724  |            |           |           |
|      | C | 1.194862  | 0.580044  | -0.332209 | -1839.5722 | 39.3285   | 59.3994   |
|      | C | 1.392301  | -0.876566 | -0.780724 | 106.8795   | 126.3838  | 222.3939  |
|      | C | 0.166043  | -1.634507 | -0.264439 | 289.3520   | 294.4530  | 389.2952  |
|      | C | -0.117645 | -0.953353 | 1.077975  | 409.4678   | 460.6392  | 554.0792  |
|      | C | 0.130309  | 0.500218  | 0.761161  | 600.4374   | 640.3489  | 808.0425  |
| SP2b | H | 0.848849  | 1.201293  | -1.163872 | 865.0359   | 877.0887  | 924.6861  |
|      | H | 2.293339  | -1.238981 | -0.282390 | 932.8102   | 947.4869  | 1033.4557 |
|      | H | 1.542629  | -0.965344 | -1.854221 | 1047.7214  | 1073.9077 | 1085.4118 |
|      | H | -0.687649 | -1.483723 | -0.927530 | 1092.8918  | 1163.4558 | 1190.1427 |
|      | H | 0.339546  | -2.705010 | -0.174851 | 1211.4717  | 1236.1700 | 1271.3284 |
|      | H | -1.118972 | -1.147854 | 1.462438  | 1282.7727  | 1312.2247 | 1334.6812 |

|      |   |           |           |           |            |           |           |
|------|---|-----------|-----------|-----------|------------|-----------|-----------|
|      | H | 0.599289  | -1.289496 | 1.836035  | 1347.3230  | 1367.1235 | 1418.9632 |
|      | H | -0.966770 | 0.869826  | 0.145103  | 1422.3635  | 1457.9418 | 1467.7190 |
|      | H | 0.221950  | 1.212847  | 1.578021  | 1494.3004  | 1511.1321 | 3025.9680 |
|      | O | 2.435184  | 1.077205  | 0.149187  | 3037.7388  | 3077.3154 | 3081.7875 |
|      | H | 2.370566  | 2.026643  | 0.269872  | 3107.6305  | 3134.9392 | 3137.9393 |
|      | O | -2.801785 | 0.022346  | -0.180523 | 3144.3723  | 3817.8417 | 3900.6895 |
|      | H | -3.367704 | 0.378958  | 0.514824  |            |           |           |
|      | O | -1.967185 | 1.081177  | -0.490416 |            |           |           |
|      | C | 1.258975  | -0.853144 | 0.173172  | -1905.5327 | 75.6924   | 136.3201  |
|      | C | 1.508852  | 0.048920  | -1.030104 | 161.5966   | 201.8011  | 226.7204  |
|      | C | 0.561139  | 1.253308  | -0.837022 | 322.8239   | 360.1889  | 390.8355  |
|      | C | 0.191767  | 1.234706  | 0.636363  | 430.7753   | 555.3893  | 632.8350  |
|      | C | 0.993144  | 0.137525  | 1.307179  | 676.0701   | 740.8140  | 796.5126  |
|      | H | 2.100946  | -1.516424 | 0.381015  | 838.1422   | 877.3951  | 913.6891  |
|      | H | 1.344853  | -0.487814 | -1.962519 | 924.6376   | 968.1293  | 1003.5876 |
|      | H | 2.548460  | 0.377164  | -1.009516 | 1036.7658  | 1060.0461 | 1083.7726 |
|      | H | 1.035313  | 2.193332  | -1.121222 | 1095.2383  | 1151.9557 | 1194.3138 |
| SP3a | H | -0.334190 | 1.157086  | -1.456166 | 1220.4055  | 1229.8977 | 1252.0691 |
|      | H | 0.100293  | 2.184828  | 1.154181  | 1278.5145  | 1312.6802 | 1328.3302 |
|      | H | -1.062803 | 0.777261  | 0.669704  | 1356.5944  | 1380.9181 | 1418.5193 |
|      | H | 1.950000  | 0.525596  | 1.672392  | 1470.1210  | 1472.2677 | 1488.4342 |
|      | H | 0.483561  | -0.318128 | 2.158962  | 1494.8715  | 1503.9107 | 3036.6022 |
|      | O | 0.102694  | -1.640518 | -0.115157 | 3059.3663  | 3071.1518 | 3087.4710 |
|      | H | -0.242105 | -2.002169 | 0.705960  | 3090.0880  | 3099.5264 | 3141.6604 |
|      | O | -2.200449 | -0.155362 | -0.727030 | 3153.9324  | 3689.7569 | 3876.1353 |
|      | H | -1.570325 | -0.890938 | -0.813731 |            |           |           |
|      | O | -2.081903 | 0.179919  | 0.607614  |            |           |           |
| SP3b | C | -1.005608 | -0.598095 | -0.220620 | -1833.6048 | 60.8773   | 67.7310   |
|      | C | -1.560792 | 0.757290  | -0.645958 | 105.1100   | 153.0701  | 199.4323  |

|     |   |           |           |           |            |           |           |
|-----|---|-----------|-----------|-----------|------------|-----------|-----------|
|     | C | -0.492746 | 1.774954  | -0.204208 | 283.3724   | 295.2563  | 366.9966  |
|     | C | 0.346855  | 1.033905  | 0.834737  | 419.6732   | 471.4151  | 555.6924  |
|     | C | -0.324160 | -0.287476 | 1.114708  | 578.0827   | 650.5826  | 776.3483  |
|     | H | -0.243807 | -0.928472 | -0.935639 | 832.4807   | 895.8679  | 911.1770  |
|     | H | -2.492299 | 0.912630  | -0.098227 | 956.1129   | 981.4739  | 992.2447  |
|     | H | -1.786636 | 0.799634  | -1.708830 | 1067.2205  | 1088.0043 | 1093.2030 |
|     | H | 0.127179  | 2.093506  | -1.044465 | 1142.9051  | 1163.6663 | 1184.1979 |
|     | H | -0.935785 | 2.678721  | 0.215185  | 1222.6673  | 1237.7229 | 1273.4981 |
|     | H | 1.416992  | 0.688362  | 0.181030  | 1277.9880  | 1305.2852 | 1327.8565 |
|     | H | 0.741836  | 1.601291  | 1.673091  | 1340.4635  | 1380.7095 | 1422.0659 |
|     | H | 0.364275  | -1.067342 | 1.442500  | 1442.8654  | 1454.9165 | 1470.1871 |
|     | H | -1.099627 | -0.172776 | 1.881526  | 1483.9233  | 1510.3305 | 3023.9280 |
|     | O | -2.053878 | -1.539535 | -0.140101 | 3040.9295  | 3065.9046 | 3077.0543 |
|     | H | -1.682747 | -2.413755 | -0.007848 | 3100.7359  | 3105.8256 | 3144.0647 |
|     | O | 2.344798  | -1.100378 | -0.240046 | 3145.1933  | 3817.8785 | 3907.0093 |
|     | H | 3.061048  | -1.169947 | 0.402680  |            |           |           |
|     | O | 2.302614  | 0.251748  | -0.528973 |            |           |           |
| SP4 | C | 0.162782  | 0.431917  | 0.169129  | -1820.3992 | 20.6058   | 57.0103   |
|     | C | 0.472609  | -0.800219 | -0.678690 | 74.8366    | 104.4273  | 181.8170  |
|     | C | 1.793077  | -1.290477 | -0.081883 | 246.6031   | 344.1028  | 433.9478  |
|     | C | 2.558565  | -0.002561 | 0.311635  | 464.5939   | 536.4825  | 613.9651  |
|     | C | 1.541448  | 1.154065  | 0.219070  | 668.3122   | 768.6106  | 817.5748  |
|     | H | -0.100999 | 0.132654  | 1.194260  | 844.8414   | 878.2522  | 903.0793  |
|     | H | 0.600151  | -0.474866 | -1.713530 | 959.0442   | 970.3815  | 993.4843  |
|     | H | -0.331238 | -1.533634 | -0.643265 | 1051.2680  | 1061.3521 | 1114.7558 |
|     | H | 1.593244  | -1.891251 | 0.805731  | 1161.5567  | 1192.4709 | 1203.6744 |
|     | H | 2.354643  | -1.917305 | -0.771297 | 1217.5872  | 1260.9803 | 1287.2419 |
|     | H | 2.966361  | -0.083169 | 1.317578  | 1295.3095  | 1310.8920 | 1329.7190 |
|     | H | 3.396429  | 0.184039  | -0.357774 | 1342.3500  | 1394.0565 | 1434.8776 |



|       |   |           |           |           |            |           |           |
|-------|---|-----------|-----------|-----------|------------|-----------|-----------|
|       | H | 1.592596  | 1.860295  | 1.043548  | 1488.3607  | 1495.8240 | 1502.0372 |
|       | H | 1.650334  | 1.707165  | -0.713078 | 1507.4741  | 1524.4635 | 2979.7957 |
|       | O | -0.762323 | 1.300160  | -0.343854 | 3071.4371  | 3082.0634 | 3089.7792 |
|       | H | -1.848100 | 0.702453  | -0.471292 | 3097.3117  | 3122.2284 | 3135.6835 |
|       | O | -2.542369 | -0.723020 | 0.712554  | 3141.3222  | 3157.7557 | 3806.3757 |
|       | H | -3.053174 | -0.217495 | 1.357896  |            |           |           |
|       | O | -2.694201 | -0.005294 | -0.454242 |            |           |           |
| SPcpt | C | 1.026245  | 1.298892  | -0.055285 | -1818.0308 | 32.7307   | 53.0157   |
|       | C | 0.247519  | 0.577258  | 1.024823  | 120.6215   | 173.9703  | 261.7063  |
|       | C | 0.620720  | -0.895677 | 0.971910  | 319.8466   | 408.1705  | 535.6541  |
|       | C | 1.505466  | -1.039243 | -0.285885 | 582.9517   | 649.9417  | 784.8498  |
|       | C | 1.202633  | 0.211881  | -1.118376 | 839.1089   | 875.7392  | 912.6356  |
|       | H | 0.519754  | 2.192165  | -0.419463 | 918.8596   | 930.5911  | 960.6089  |
|       | H | 2.002578  | 1.607671  | 0.336194  | 1013.7525  | 1048.9626 | 1068.6914 |
|       | H | -0.970872 | 0.632277  | 0.571588  | 1090.0679  | 1165.9206 | 1199.6829 |
|       | H | 0.161862  | 1.048109  | 2.000931  | 1207.6041  | 1233.1599 | 1244.6434 |
|       | H | 1.134727  | -1.211582 | 1.881109  | 1292.8514  | 1302.9300 | 1337.1531 |
|       | H | -0.273029 | -1.518976 | 0.887395  | 1353.1848  | 1354.6322 | 1417.5266 |
|       | H | 2.557881  | -1.036436 | 0.003761  | 1453.7404  | 1476.7349 | 1477.4259 |
|       | H | 1.315272  | -1.964207 | -0.826460 | 1495.6385  | 1511.7360 | 3024.1649 |
|       | H | 1.982232  | 0.440214  | -1.842896 | 3055.0241  | 3068.1437 | 3077.3289 |
|       | H | 0.261703  | 0.082210  | -1.656412 | 3090.3878  | 3114.1870 | 3129.6020 |
|       | O | -2.153586 | -0.641497 | -0.532667 | 3136.7789  | 3143.3810 | 3818.0776 |
|       | H | -2.713300 | -1.103299 | 0.103331  |            |           |           |
|       | O | -2.045701 | 0.630646  | -0.000108 |            |           |           |
| Prdl  | C | 0.795099  | 0.003992  | -0.228268 | 99.8796    | 241.3570  | 304.6180  |
|       | C | -0.031846 | -1.241841 | -0.151186 | 315.1142   | 386.4236  | 555.5979  |
|       | C | -1.420149 | -0.719061 | 0.265898  | 566.4025   | 780.2841  | 849.7756  |
|       | C | -1.435246 | 0.747993  | -0.190163 | 871.3560   | 910.1371  | 922.1606  |

|       |   |           |           |           |           |           |           |
|-------|---|-----------|-----------|-----------|-----------|-----------|-----------|
|       | C | -0.006804 | 1.223582  | 0.101564  | 969.0797  | 1025.2574 | 1042.8062 |
|       | H | 0.386389  | -1.951378 | 0.567072  | 1107.7178 | 1138.3364 | 1168.2400 |
|       | H | -0.073249 | -1.757950 | -1.115327 | 1226.3258 | 1247.2071 | 1283.3246 |
|       | H | -2.241077 | -1.300718 | -0.149252 | 1299.2694 | 1323.1664 | 1343.0390 |
|       | H | -1.507846 | -0.754216 | 1.353256  | 1387.7901 | 1420.9493 | 1484.6864 |
|       | H | -1.623387 | 0.802667  | -1.263754 | 1486.9682 | 1495.7325 | 1515.7310 |
|       | H | -2.194905 | 1.341826  | 0.314651  | 2967.3266 | 3030.3558 | 3062.7146 |
|       | H | 0.278758  | 2.106235  | -0.475714 | 3063.9954 | 3076.7379 | 3079.3175 |
|       | H | 0.099291  | 1.482107  | 1.166401  | 3125.8674 | 3133.6570 | 3896.6340 |
|       | O | 2.117547  | -0.102567 | 0.093955  |           |           |           |
|       | H | 2.529324  | 0.763968  | 0.063958  |           |           |           |
|       | C | -0.875406 | 0.095600  | 0.496993  | 129.4074  | 201.7778  | 215.4982  |
|       | C | 0.022934  | -1.140370 | 0.517363  | 310.3262  | 415.8217  | 461.6257  |
|       | C | 1.159192  | -0.778300 | -0.446573 | 597.9539  | 768.8243  | 835.4217  |
|       | C | 1.426206  | 0.708855  | -0.149951 | 851.1764  | 914.5582  | 917.4343  |
|       | C | 0.098494  | 1.214105  | 0.313508  | 934.9300  | 988.4511  | 1041.5551 |
|       | H | -1.478107 | 0.194285  | 1.403988  | 1045.9214 | 1053.6575 | 1149.7748 |
|       | H | -0.527759 | -2.034473 | 0.231570  | 1190.3160 | 1233.0802 | 1246.0240 |
| Prd2a | H | 0.414972  | -1.279734 | 1.526904  | 1308.8460 | 1311.9870 | 1345.2175 |
|       | H | 2.041715  | -1.401699 | -0.318439 | 1349.0741 | 1376.5713 | 1403.5946 |
|       | H | 0.809880  | -0.890224 | -1.472669 | 1473.0914 | 1485.2191 | 1505.3320 |
|       | H | 2.175387  | 0.814499  | 0.645351  | 3001.8660 | 3048.0225 | 3074.0800 |
|       | H | 1.817823  | 1.254127  | -1.010997 | 3076.0585 | 3093.1708 | 3135.6965 |
|       | H | -0.127722 | 2.251175  | 0.514989  | 3143.3476 | 3216.7891 | 3893.4351 |
|       | O | -1.752192 | -0.041501 | -0.631250 |           |           |           |
|       | H | -2.097181 | 0.824716  | -0.858734 |           |           |           |
|       | C | -0.821964 | -0.029013 | 0.401859  | 99.7753   | 230.3090  | 260.2615  |
| Prd2b | C | 0.059714  | -1.177807 | -0.097016 | 326.5283  | 389.9748  | 512.7127  |
|       | C | 1.491404  | -0.678712 | 0.110593  | 564.5360  | 637.0350  | 844.6876  |

|       |   |           |           |           |           |           |           |
|-------|---|-----------|-----------|-----------|-----------|-----------|-----------|
|       | C | 1.407892  | 0.815402  | -0.251701 | 878.0415  | 898.9953  | 927.0768  |
|       | C | 0.026291  | 1.182513  | 0.172116  | 955.4940  | 1015.1617 | 1042.2392 |
|       | H | -1.040462 | -0.156234 | 1.472150  | 1070.2151 | 1089.6337 | 1127.7755 |
|       | H | -0.147390 | -1.298722 | -1.162359 | 1207.7605 | 1229.8608 | 1267.5705 |
|       | H | -0.155310 | -2.121474 | 0.399758  | 1301.1248 | 1307.3641 | 1326.9322 |
|       | H | 1.774736  | -0.782927 | 1.159667  | 1349.5958 | 1364.8003 | 1417.6764 |
|       | H | 2.220863  | -1.223501 | -0.485642 | 1474.9129 | 1494.8475 | 1508.9793 |
|       | H | 2.183108  | 1.418717  | 0.223837  | 2971.0212 | 2994.0325 | 3067.6195 |
|       | H | 1.533356  | 0.947549  | -1.334697 | 3077.5234 | 3084.2996 | 3129.6700 |
|       | H | -0.346109 | 2.192882  | 0.259476  | 3141.2266 | 3219.3313 | 3902.3228 |
|       | O | -2.049172 | -0.039789 | -0.319118 |           |           |           |
|       | H | -2.609429 | 0.667731  | 0.005642  |           |           |           |
|       | C | -0.859657 | -0.020538 | 0.473328  | 155.1009  | 186.6677  | 291.9018  |
|       | C | 0.186884  | -1.124889 | 0.575770  | 311.9239  | 394.2170  | 416.3387  |
|       | C | 1.298693  | -0.667076 | -0.383905 | 657.3364  | 766.3033  | 826.6582  |
|       | C | 1.224929  | 0.823537  | -0.303096 | 864.2753  | 910.9330  | 931.2909  |
|       | C | -0.021647 | 1.265374  | 0.393667  | 940.4613  | 980.3252  | 1038.4237 |
|       | H | -1.550512 | -0.018728 | 1.320485  | 1048.8043 | 1061.0413 | 1122.4927 |
|       | H | -0.237836 | -2.094949 | 0.325981  | 1178.0583 | 1226.3688 | 1250.2870 |
| Prd3a | H | 0.566356  | -1.163104 | 1.598047  | 1282.8912 | 1314.0478 | 1326.5760 |
|       | H | 2.278834  | -1.065151 | -0.114245 | 1361.0867 | 1389.2258 | 1417.5730 |
|       | H | 1.084858  | -1.016105 | -1.400511 | 1465.5445 | 1473.4677 | 1491.2811 |
|       | H | 1.943734  | 1.494469  | -0.746235 | 2998.7122 | 3020.2720 | 3053.4029 |
|       | H | 0.184743  | 1.638145  | 1.405546  | 3055.5395 | 3074.2495 | 3088.1740 |
|       | H | -0.556605 | 2.066252  | -0.125566 | 3143.5276 | 3233.6956 | 3901.9776 |
|       | O | -1.569342 | -0.250306 | -0.735098 |           |           |           |
|       | H | -2.134051 | 0.503166  | -0.917299 |           |           |           |
| Prd3b | C | -0.747121 | -0.034145 | 0.356902  | 161.1542  | 180.3599  | 270.9586  |
|       | C | 0.129850  | -1.164994 | -0.168051 | 312.4708  | 368.2491  | 475.1089  |

|         |   |           |           |           |           |           |           |
|---------|---|-----------|-----------|-----------|-----------|-----------|-----------|
|         | C | 1.560114  | -0.658698 | 0.068121  | 554.1091  | 660.2944  | 822.0205  |
|         | C | 1.422927  | 0.829002  | -0.041938 | 885.5880  | 909.2832  | 932.0226  |
|         | C | -0.011301 | 1.235656  | -0.100489 | 968.1214  | 1003.4081 | 1052.5547 |
|         | H | -0.755708 | -0.066009 | 1.453482  | 1069.8012 | 1105.3188 | 1135.9392 |
|         | H | -0.067171 | -1.265685 | -1.237424 | 1185.4367 | 1231.7855 | 1273.3346 |
|         | H | -0.087127 | -2.118428 | 0.308844  | 1276.3644 | 1308.1819 | 1328.8415 |
|         | H | 1.913805  | -0.950054 | 1.065217  | 1348.7786 | 1384.7416 | 1434.2650 |
|         | H | 2.277049  | -1.077307 | -0.641160 | 1474.5205 | 1481.2498 | 1506.7505 |
|         | H | 2.254705  | 1.514874  | -0.074244 | 2987.4296 | 3002.2378 | 3013.2817 |
|         | H | -0.245534 | 2.111885  | 0.508953  | 3068.4101 | 3070.3108 | 3081.0784 |
|         | H | -0.332782 | 1.463465  | -1.126447 | 3140.6223 | 3232.7175 | 3902.6688 |
|         | O | -2.059034 | -0.172152 | -0.145037 |           |           |           |
|         | H | -2.611782 | 0.523541  | 0.215815  |           |           |           |
|         | C | 0.950227  | 0.019644  | 0.439271  | 60.4637   | 245.8863  | 362.2104  |
|         | C | 0.005704  | 1.259512  | 0.202077  | 401.7924  | 561.3445  | 659.2387  |
|         | C | -1.390540 | 0.670508  | -0.065719 | 802.0518  | 827.5951  | 852.4513  |
|         | C | -1.131543 | -0.786914 | -0.452997 | 889.8464  | 924.6615  | 937.7440  |
|         | C | -0.000079 | -1.183919 | 0.490253  | 991.8479  | 1011.3524 | 1051.0647 |
|         | H | 1.543808  | 0.154029  | 1.349495  | 1064.5585 | 1154.0131 | 1193.1303 |
|         | H | 0.377427  | 1.824228  | -0.651645 | 1235.2322 | 1246.7152 | 1274.8758 |
| Prd4    | H | 0.039703  | 1.914591  | 1.069347  | 1301.4930 | 1323.7814 | 1328.5680 |
|         | H | -1.984537 | 0.701761  | 0.849189  | 1349.3044 | 1386.5378 | 1483.0029 |
|         | H | -1.931493 | 1.227798  | -0.828028 | 1484.4368 | 1494.6600 | 1515.7429 |
|         | H | -2.013573 | -1.418272 | -0.361873 | 3031.0267 | 3065.7814 | 3072.3634 |
|         | H | -0.778855 | -0.842476 | -1.483993 | 3081.6011 | 3096.0597 | 3126.0708 |
|         | H | -0.376485 | -1.296329 | 1.510098  | 3129.4338 | 3136.5689 | 3148.6041 |
|         | H | 0.513604  | -2.102800 | 0.212163  |           |           |           |
|         | O | 1.750974  | -0.004439 | -0.667758 |           |           |           |
| Prd-cpt | C | 0.618087  | -1.118651 | 0.154629  | 171.8126  | 247.2005  | 321.2383  |

|                               |   |           |           |           |           |           |           |
|-------------------------------|---|-----------|-----------|-----------|-----------|-----------|-----------|
|                               | C | 1.270328  | 0.274443  | -0.010139 | 561.5318  | 657.1119  | 829.0402  |
|                               | C | 0.097605  | 1.278780  | -0.134710 | 863.9802  | 898.3117  | 914.2029  |
|                               | C | -1.154498 | 0.482971  | 0.253634  | 929.1983  | 938.7157  | 1016.3723 |
|                               | C | -0.842718 | -0.921079 | -0.263176 | 1043.3653 | 1051.6096 | 1097.2218 |
|                               | H | 1.125055  | -1.890525 | -0.422018 | 1190.7801 | 1229.6192 | 1245.2534 |
|                               | H | 0.651758  | -1.423735 | 1.201796  | 1297.2938 | 1306.1922 | 1334.7216 |
|                               | H | 1.903268  | 0.309592  | -0.895651 | 1353.3197 | 1373.5668 | 1477.7451 |
|                               | H | 1.907863  | 0.509196  | 0.840773  | 1479.9569 | 1494.4942 | 1510.6119 |
|                               | H | 0.239584  | 2.166840  | 0.478767  | 2990.8450 | 2991.6356 | 3060.8882 |
|                               | H | 0.003623  | 1.614489  | -1.168399 | 3065.2933 | 3076.0623 | 3076.7877 |
|                               | H | -1.259184 | 0.453582  | 1.341080  | 3124.0819 | 3130.1926 | 3230.6070 |
|                               | H | -2.070949 | 0.905438  | -0.156164 |           |           |           |
|                               | H | -1.507162 | -1.688721 | 0.131294  |           |           |           |
|                               | H | -0.926682 | -0.934928 | -1.352902 |           |           |           |
| H <sub>2</sub> O <sub>2</sub> | O | 0.000000  | -0.710054 | -0.058025 | 381.0059  | 1046.6469 | 1368.5939 |
|                               | H | -0.785844 | -0.903139 | 0.464198  | 1478.6921 | 3855.0882 | 3855.8399 |
|                               | O | 0.000000  | 0.710054  | -0.058025 |           |           |           |
|                               | H | 0.785844  | 0.903139  | 0.464198  |           |           |           |
